# Supplementary material for: A rhodium(iii)-catalyzed tunable coupling reaction of indole derivatives with alkylidenecyclopropanesviaC–H activation
Source: Royal Society of Chemistry journal article supplement (doi:10.1039/c9cc03134k), 2019-01-01
Supplement: c9cc03134k1.pdf [file c9cc03134k1.pdf]

## Supporting Information

### **Rhodium(III)-catalyzed tunable coupling reaction of indole derivatives with alkylidenecyclopropanes via C–H activation**

*Ruixing Liu,<sup>†</sup> Yin Wei,<sup>†</sup> and Min Shi<sup>†\*</sup>*

<sup>†</sup>State Key Laboratory of Organometallic Chemistry, Center for Excellence in Molecular Synthesis,  
Shanghai Institute of Organic Chemistry, University of Chinese Academy of Science, Chinese  
Academy of Sciences, 354 Fenglin Road, Shanghai 200032 China.

[mshi@mail.sioc.ac.cn](mailto:mshi@mail.sioc.ac.cn). Fax (+86)-21-64166128

#### CONTENTS

|                                                            |         |
|------------------------------------------------------------|---------|
| (A) General Remarks.....                                   | S2      |
| (B) Experimental Procedure and Condition Optimization..... | S3      |
| (C) Derivatization of Reaction Products.....               | S5      |
| (D) Product Characterization.....                          | S6-S48  |
| (E) X-ray Crystal Data.....                                | S49-S50 |

## **(A) General Remarks**

$^1\text{H}$  and  $^{13}\text{C}$  NMR spectra were recorded at 400 MHz, respectively. HRMS spectra were recorded by ESI method. Infrared spectra were recorded on a Perkin-Elmer PE-983 spectrometer with absorption in  $\text{cm}^{-1}$ . Mass spectra were recorded by ESI, HRMS was measured on Agilent 6224 LC/MS instrument. Melting points were determined on a digital melting point apparatus and temperatures were uncorrected. X-ray structure was determined on a Bruker Smart-1000 X-ray Diffraction meter. The employed solvents were dried up by standard methods when necessary. Commercially obtained reagents were used without further purification. All reactions were monitored by TLC with silica gel coated plates (Huanghai GF254). Flash column chromatography was performed by using 300-400 mesh silica gel eluting with ethyl acetate and petroleum ether at increased pressure.

## (B) Experimental Procedure and Condition Optimization

### General Procedure for the Preparation of 3aa

To a Schlenk tube with a magnetic stirring bar was added 1-(pyrimidin-2-yl)-1H-indole **1a**, methylenecyclopropane **2a**,  $[\text{RhCp}^*\text{Cl}_2]_2$ , and  $\text{AgSbF}_6$ . Then, DMF was injected to the reaction mixture and HOAc was added. The reaction mixture was stirred and it was turned to dark purple within 60 seconds. Next, the reaction was carried out at 120 °C. After the reaction was complete, the reaction mixture was filtered through a celite to remove the salts. The solution was concentrated under reduced pressure and the residue was purified with a silica gel column chromatography to afford the product.

### Preliminary Condition Optimization

**Table S1** Preliminary Condition Optimization of **3aa** and **4aa**

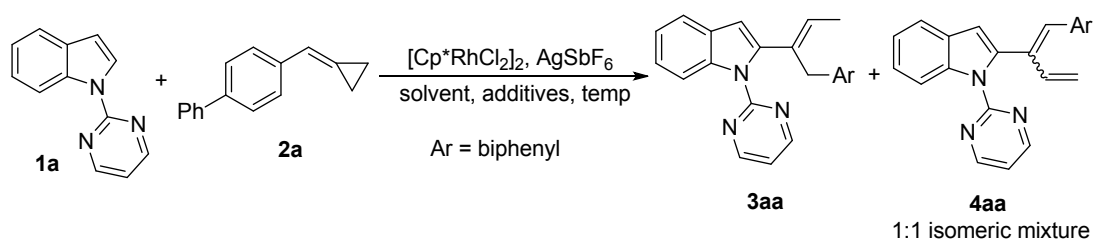

| entry | solvent | temp. | additives | yield of <b>3aa/4aa</b> (%) |
|-------|---------|-------|-----------|-----------------------------|
| 1     | DMF     | 20    | HOAc      | 1/30                        |
| 2     | DMF     | 70    | HOAc      | 16/43                       |
| 3     | DMF     | 120   | HOAc      | 17/62                       |
| 4     | DMF     | 120   | PivOH     | 30/52                       |
| 5     | DMF     | 120   | PhCOOH    | 28/60                       |
| 6     | DMF     | 120   | AdCOOH    | 28/62                       |
| 7     | DMF     | 120   | -         | 12/55                       |
| 8     | DCE     | 120   | HOAc      | 31/48                       |
| 9     | MeCN    | 120   | HOAc      | 15/58                       |
| 10    | EtOH    | 120   | HOAc      | 32/49                       |

<sup>a</sup> **1a** (0.10 mmol), **2a** (0.12 mmol), HOAc (0.20 mmol),  $[\text{Cp}^*\text{RhCl}_2]_2$  (4 mol %),  $\text{AgSbF}_6$  (20 mol %), additives (2 equiv) were added. All the reactions were carried out in a 0.10 mmol scale in solvent (1.0 mL) at 120 °C for 12 h.

## Condition Optimization of Halide Effect

To a Schlenk tube with a magnetic stirring bar was added 1-(pyrimidin-2-yl)-1H-indole **1a**, methylenecyclopropane **2a**,  $[\text{RhCp}^*\text{Cl}_2]_2$ , and  $\text{AgSbF}_6$ . Then, DMF was injected to the reaction mixture and HOAc was added. The reaction mixture was stirred and it was turned to dark purple within 60 seconds. Next, alkali metal halide was added into the mixture and the reaction was carried out at 120 °C. After reaction was complete, the mixture was filtered through a celite to remove the salts. The solution was concentrated under reduced pressure and the residue was purified with a silica gel column chromatography to afford the product. KBr and KI may poison the rhodium catalyst due to the large ionic radius and high coordination ability of  $\text{Br}^-$  or  $\text{I}^-$ , resulting none of the desired product being formed.

**Table S2** Condition Optimization of Halide Effect of **3aa** and **4aa**

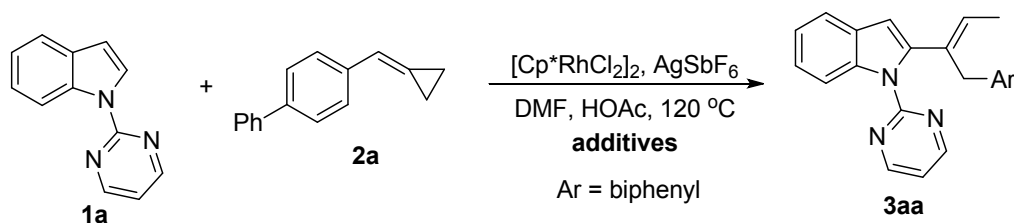

| entry <sup>a</sup> | additives (equiv)             | solvents | yield/[%] |
|--------------------|-------------------------------|----------|-----------|
| 1                  | LiCl (2.0)                    | DMF      | 63        |
| 2                  | NaCl (2.0)                    | DMF      | 70        |
| 3                  | KCl (2.0)                     | DMF      | 88        |
| 4                  | CsCl (2.0)                    | DMF      | 88        |
| 5                  | KI (2.0)                      | DMF      | 0         |
| 6                  | KBr (2.0)                     | DMF      | 9         |
| 7                  | $\text{C}_2\text{Cl}_6$ (2.0) | DMF      | 72        |
| 8                  | $\text{Me}_4\text{NCl}$ (2.0) | DMF      | 35        |
| 9                  | KCl (1.0)                     | DMF      | 65        |
| 10                 | KCl (3.0)                     | DMF      | 83        |
| 11                 | KCl (5.0)                     | DMF      | 71        |
| 12 <sup>b</sup>    | KCl (2.0)                     | DMF      | -         |

<sup>a</sup> **1a** (0.10 mmol), **2a** (0.12 mmol), HOAc (0.20 mmol),  $[\text{Cp}^*\text{RhCl}_2]_2$  (4 mol %),  $\text{AgSbF}_6$  (20 mol %), DMF (1.0 mL) and halide (2.0 equiv) were added. All the reactions were carried out in a 0.10 mmol scale in DMF (1.0 mL) at 120 °C for 12 h. <sup>b</sup> Without  $\text{AgSbF}_6$ .

**Table S3** Condition Optimization of **3na** and **4na**

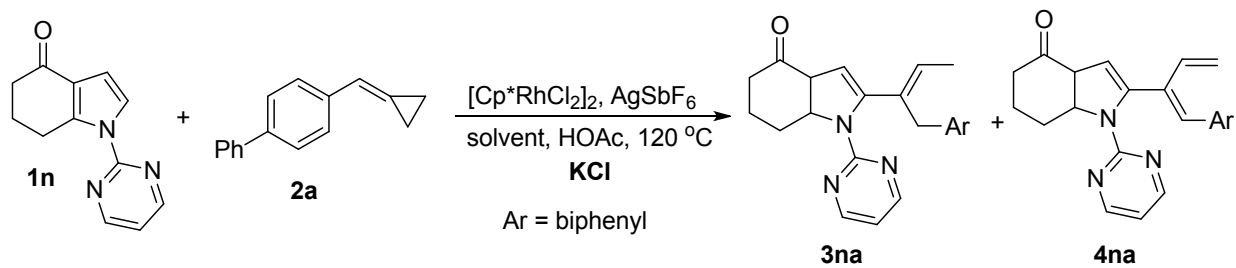

| entry <sup>a</sup> | solvent | yield/[%] <b>3na/4na</b> |
|--------------------|---------|--------------------------|
| 1                  | DMF     | 38/38                    |
| 2                  | DCE     | 35/36                    |
| 3                  | EtOH    | 37/37                    |

<sup>a</sup> **1n** (0.10 mmol), **2a** (0.12 mmol), HOAc (0.20 mmol),  $[\text{Cp}^*\text{RhCl}_2]_2$  (4 mol %),  $\text{AgSbF}_6$  (20 mol %), solvent (1.0 mL) and KCl (2.0 equiv) were added. All the reactions were carried out in a 0.10 mmol scale in DMF (1.0 mL) at  $120\text{ }^\circ\text{C}$  for 12 h.

### (C) Derivatization of Reaction Products

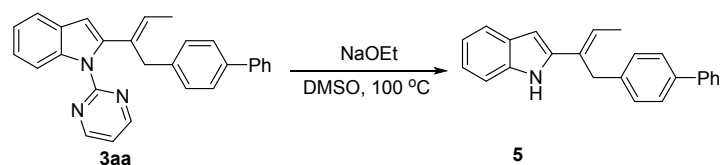

To a Schlenk tube with a magnetic stirring bar was added product **3aa** and NaOEt. Then DMSO was injected to the mixture. The reaction was carried out at 100 °C. After reaction was completed, the mixture was washed by water and dried over anhydrous Na<sub>2</sub>SO<sub>4</sub>. The solvent was removed under the reduced pressure and the residue was purified with a silica gel column chromatography to afford the product **5** in 86% yield.

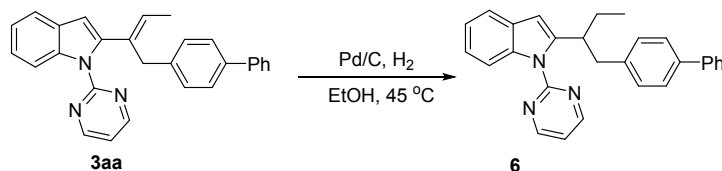

To a Schlenk tube with a magnetic stirring bar was added product **3aa** and palladium on coral. Then EtOH was injected to the mixture. The system was vacuumed and refilled with H<sub>2</sub> three times. The reaction was carried out at 45 °C. After reaction was completed, the mixture was filtered through a celite to remove the catalysts. The solvent was removed under reduced pressure and the residue was purified with a silica gel column chromatography to afford the product **6** in 91% yield.

## (D) Product Characterization

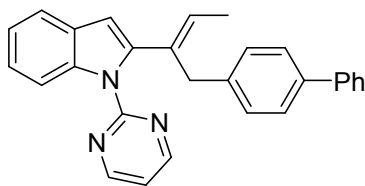

**Compound 3aa:** yellow (35.3 mg, 88%).  $^1\text{H}$  NMR (400 MHz, Chloroform-*d*)  $\delta$  1.85 (d,  $J = 7.0$  Hz, 3H), 3.60 (s, 2H), 5.93 (q,  $J = 7.0$  Hz, 1H), 6.47 (s, 1H), 7.13 – 7.18 (m, 4H), 7.20 – 7.25 (m, 1H), 7.27 – 7.33 (m, 1H), 7.36 – 7.43 (m, 4H), 7.52 (dd,  $J = 7.2$  Hz, 3H), 8.18 (d,  $J = 8.0$  Hz, 1H), 8.79 (d,  $J = 4.8$  Hz, 2H).  $^{13}\text{C}$  NMR (100 MHz, Chloroform-*d*)  $\delta$  14.5, 36.5, 108.0, 113.3, 117.3, 120.3, 121.9, 123.2, 126.8, 126.9, 127.0, 128.7, 128.9, 129.3, 130.2, 133.2, 137.4, 138.6, 138.8, 141.1, 142.9, 158.3, 158.4. IR (neat)  $\nu$  3021, 2919, 2846, 1570, 1559, 1486, 1336, 1311, 1256, 1184, 1121, 1038  $\text{cm}^{-1}$ . HRMS (ESI) Calcd. for  $\text{C}_{28}\text{H}_{24}\text{N}_3$  requires ( $\text{M}^+\text{+H}$ ): 402.1965, Found: 402.1968.

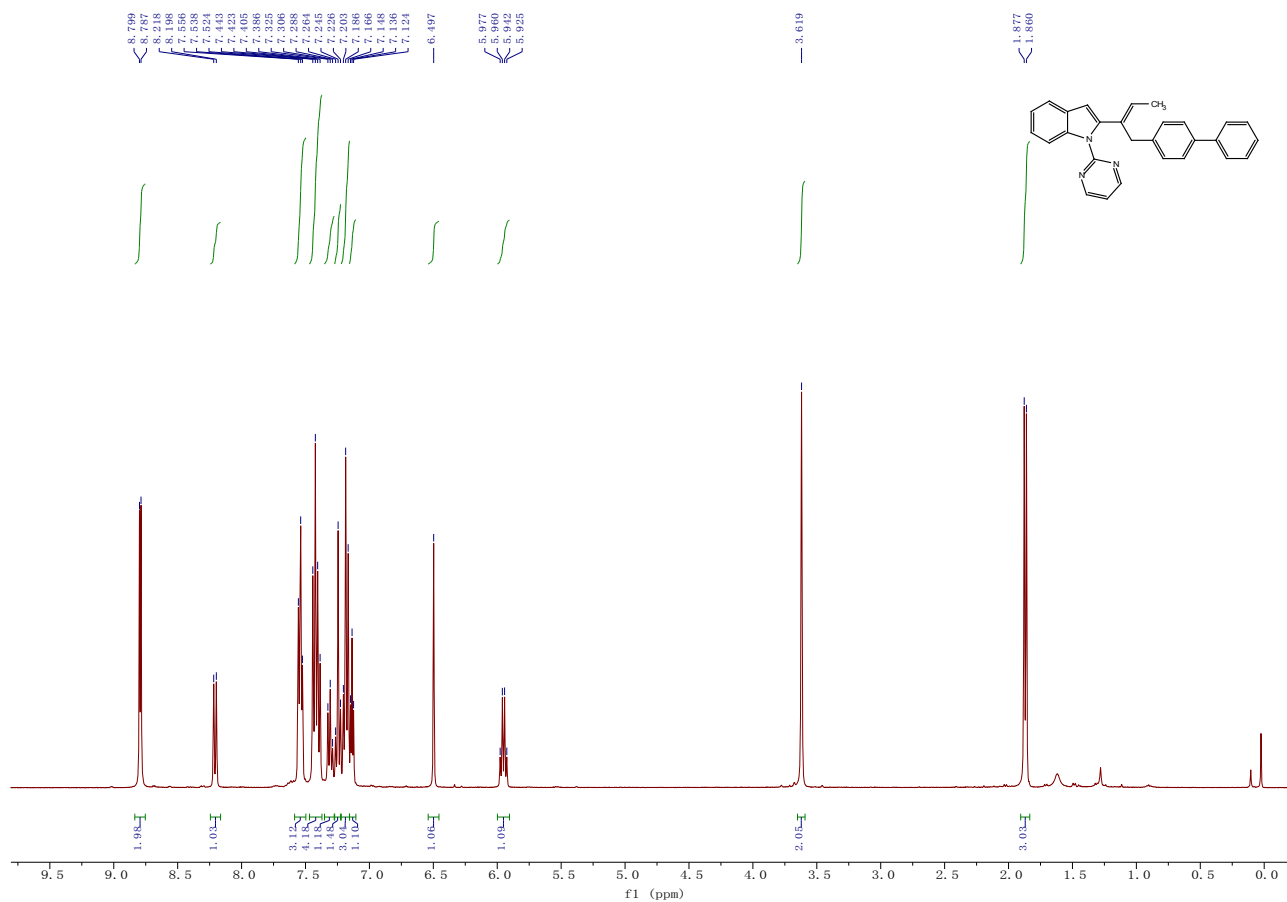

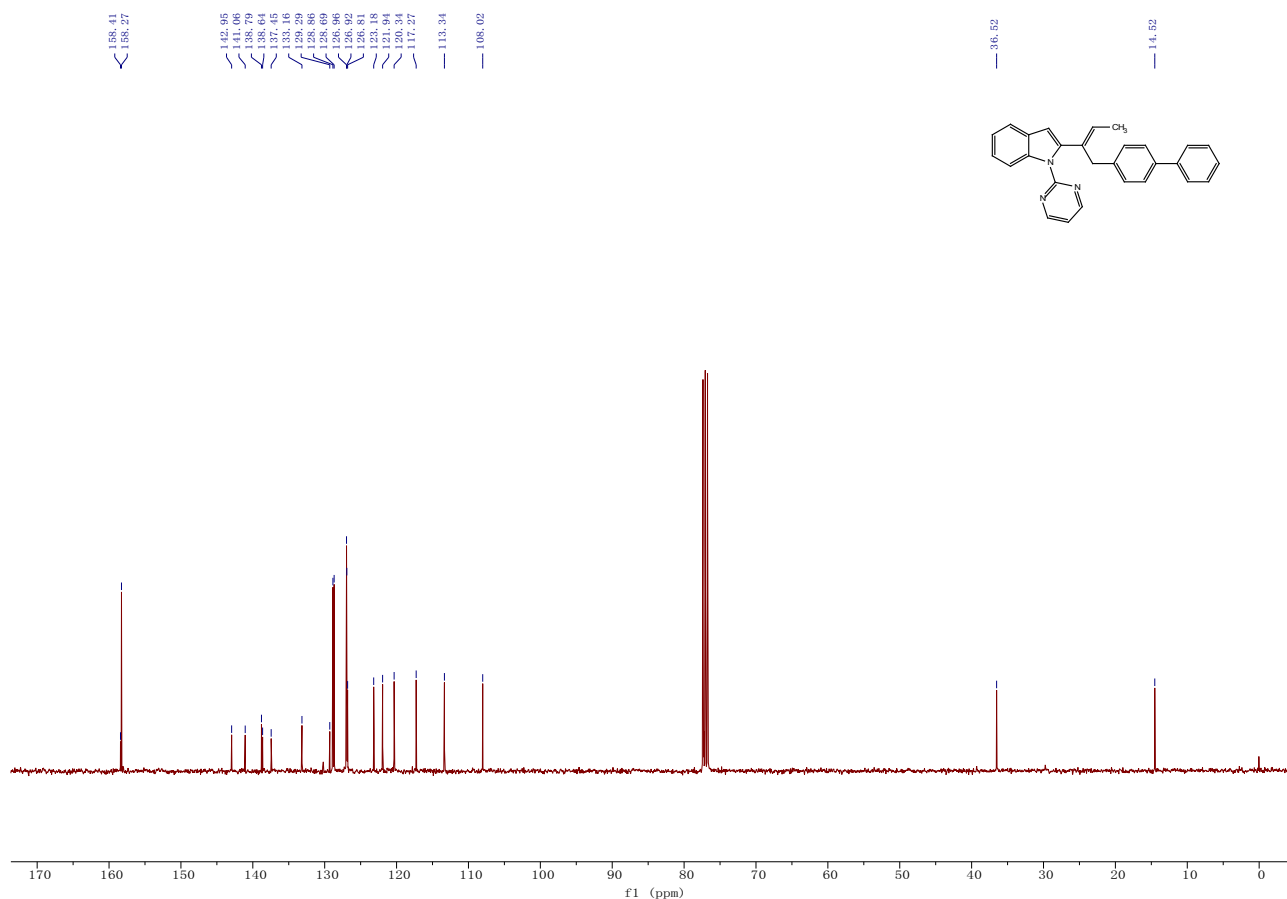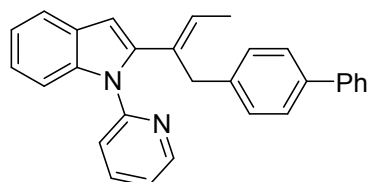

**Compound 3ba:** yellow oil (36.8 mg, 92%). <sup>1</sup>H NMR (400 MHz, Chloroform-*d*) δ 1.87 (d, *J* = 7.0 Hz, 3H), 3.67 (s, 2H), 5.80 (q, *J* = 7.0 Hz, 1H), 6.62 – 6.67 (m, 1H), 7.00 (d, *J* = 8.0 Hz, 1H), 7.17 – 7.27 (m, 4H), 7.28 – 7.32 (m, 1H), 7.36 (dd, *J* = 7.3 Hz, 1H), 7.43 – 7.52 (m, 4H), 7.57 – 7.66 (m, 4H), 7.71 – 7.78 (m, 1H), 8.72 (dd, *J* = 4.9, 1.2 Hz, 1H). <sup>13</sup>C NMR (100 MHz, Chloroform-*d*) δ 14.6, 35.9, 105.1, 111.2, 120.4, 121.1, 121.5, 121.7, 122.7, 127.0, 127.1, 128.5, 128.8, 128.9, 129.0, 131.2, 138.0, 138.2, 138.6, 138.9, 141.0, 142.0, 149.2, 152.7. IR (neat) ν 3047, 2912, 2846, 1561, 1451, 1379, 1345, 1213, 1173, 1121, 1038 cm<sup>-1</sup>. HRMS (ESI) Calcd. for C<sub>29</sub>H<sub>25</sub>N<sub>2</sub> requires (M<sup>+</sup>+H): 401.2012, Found: 401.2020.



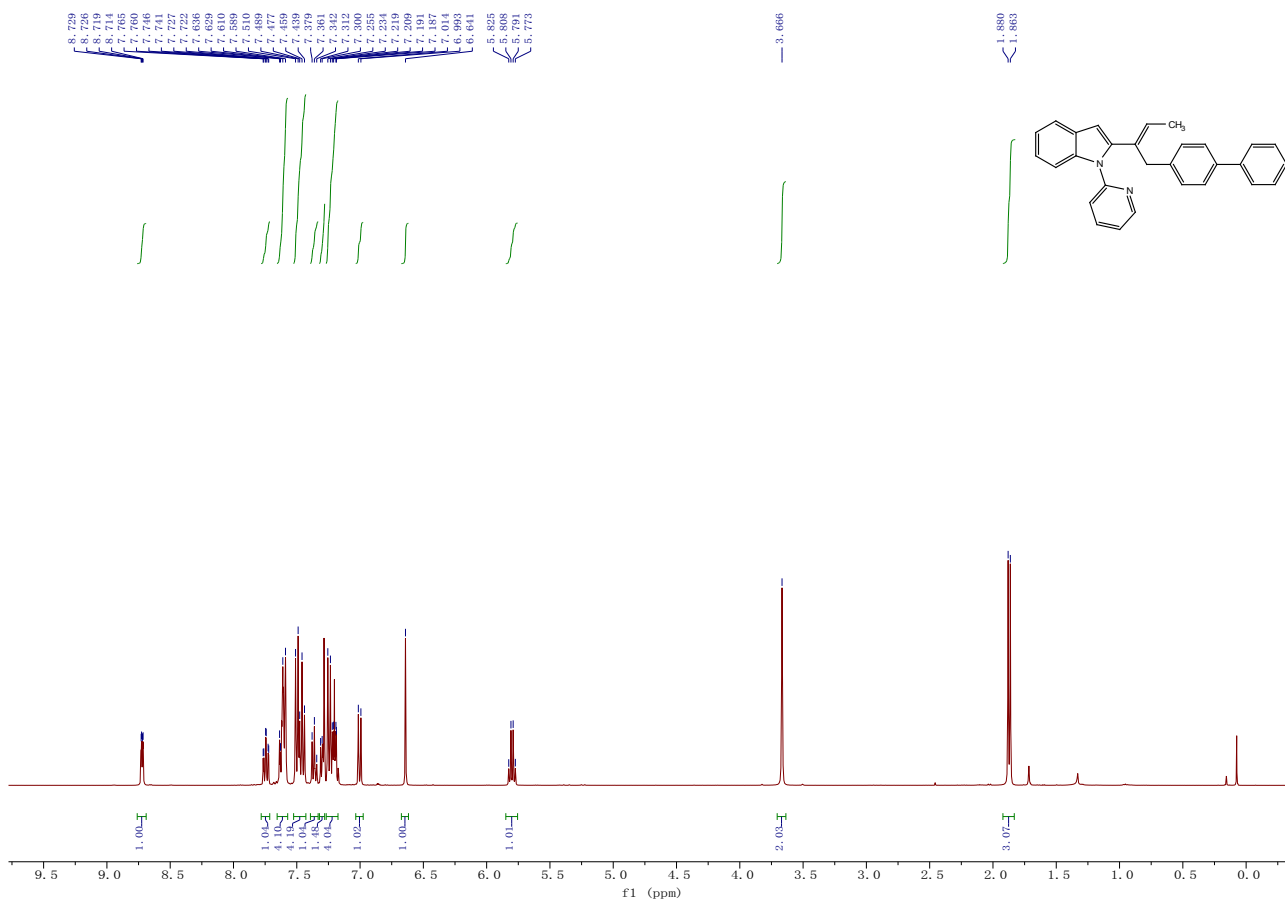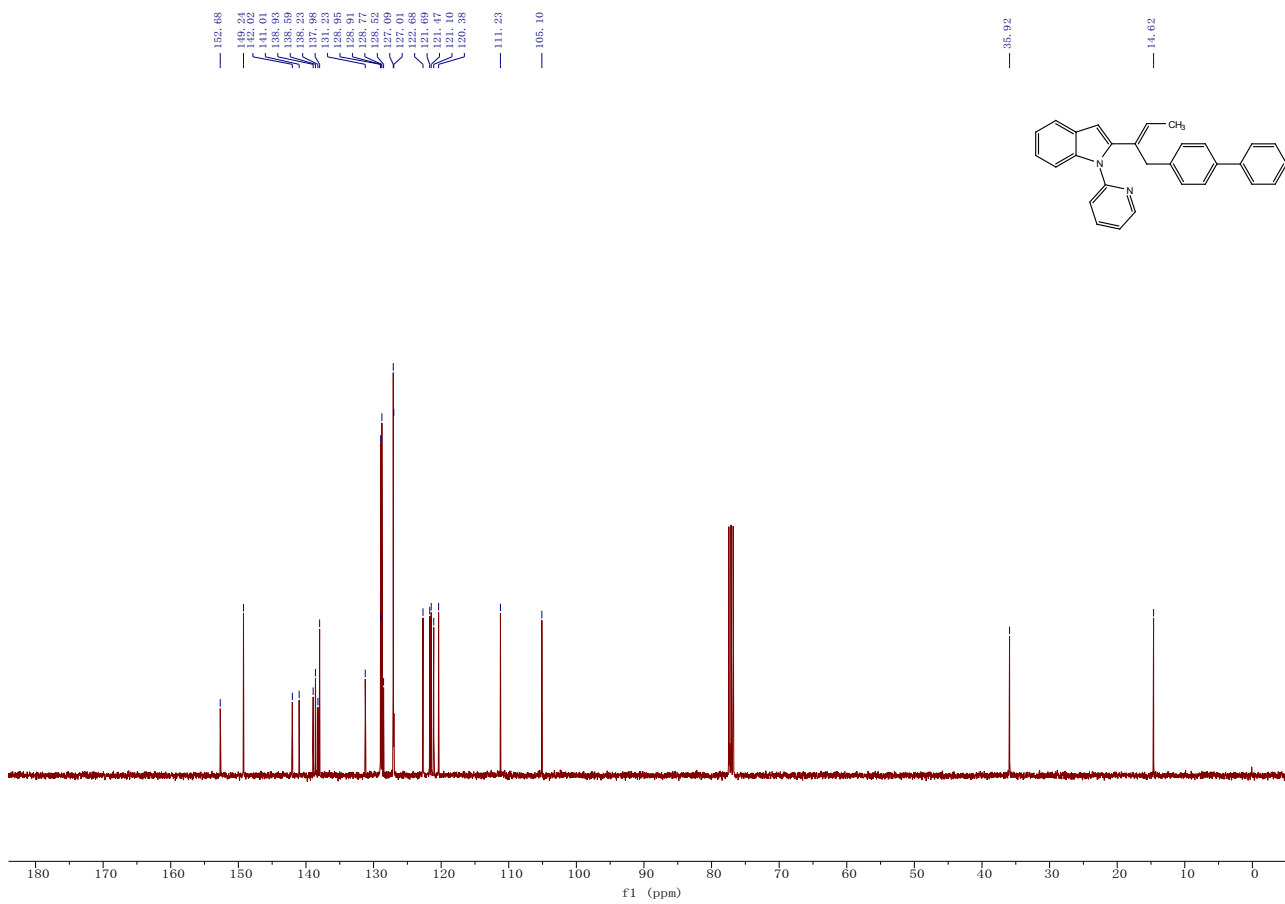

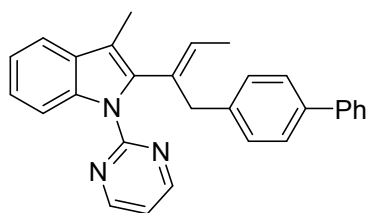

**Compound 3da:** yellow oil (37.8 mg, 91%).  $^1\text{H}$  NMR (400 MHz, Chloroform-*d*)  $\delta$  2.02 (d,  $J = 6.8$  Hz, 3H), 2.07 (s, 3H), 3.47 (s, 2H), 5.87 (q,  $J = 6.9$  Hz, 1H), 7.02 (d,  $J = 8.1$  Hz, 2H), 7.11 (dd,  $J = 4.8$  Hz, 1H), 7.20 – 7.26 (m, 1H), 7.27 – 7.34 (m, 2H), 7.33 – 7.45 (m, 4H), 7.46 – 7.57 (m, 3H), 8.35 (d,  $J = 8.2$  Hz, 1H), 8.78 (d,  $J = 4.9$  Hz, 2H).  $^{13}\text{C}$  NMR (100 MHz, Chloroform-*d*)  $\delta$  9.5, 14.5, 37.4, 113.8, 115.2, 116.6, 118.8, 121.6, 123.5, 126.7, 126.9, 127.0, 127.6, 128.7, 129.0, 130.7, 132.8, 136.2, 138.3, 138.5, 139.0, 141.0, 158.1, 158.3. IR (neat)  $\nu$  3034, 2914, 2844, 1561, 1507, 1451, 1380, 1348, 1257, 1120, 1037, 1017  $\text{cm}^{-1}$ . HRMS (ESI) Calcd. for  $\text{C}_{29}\text{H}_{26}\text{N}_3$  requires ( $\text{M}^+\text{+H}$ ): 416.2121, Found: 416.2138

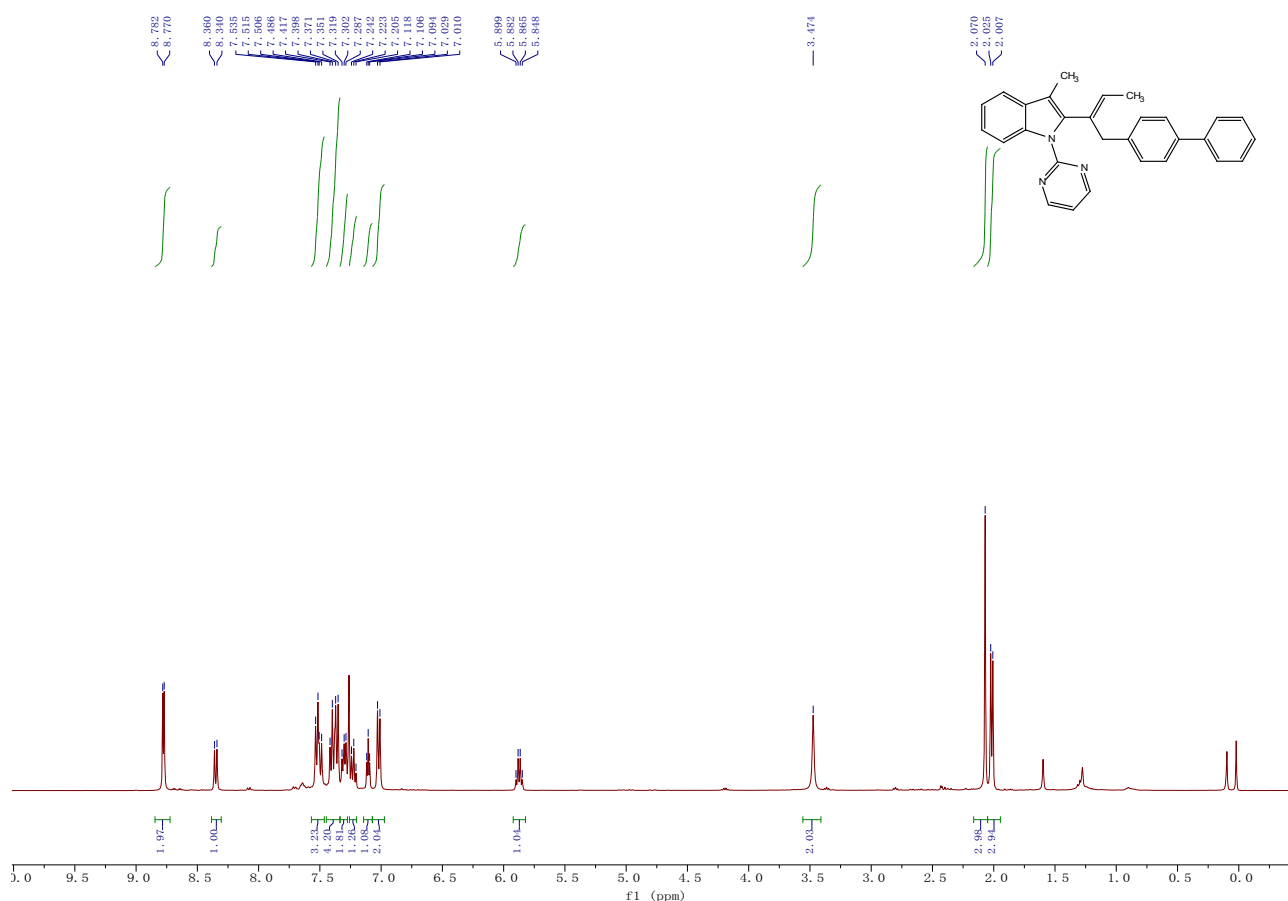

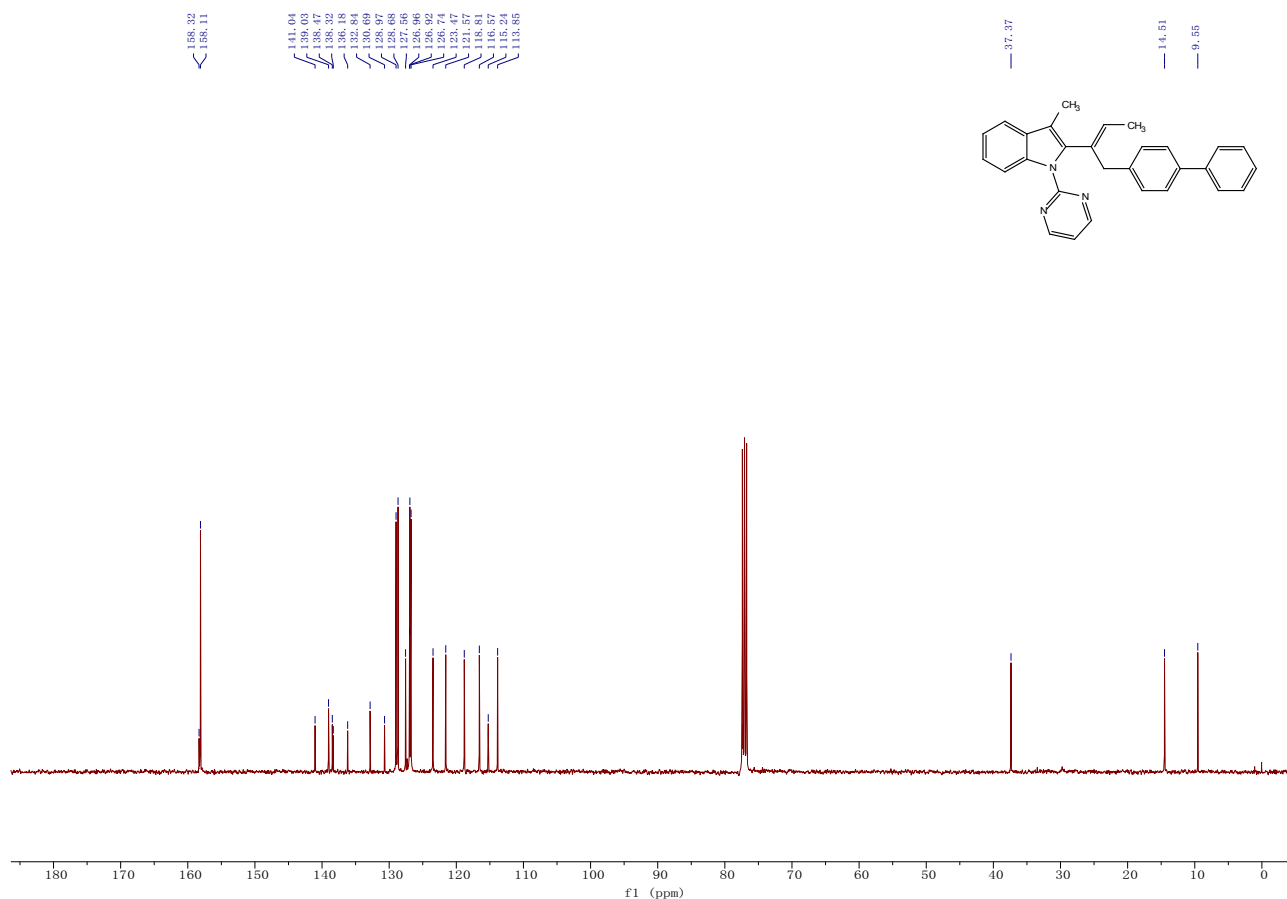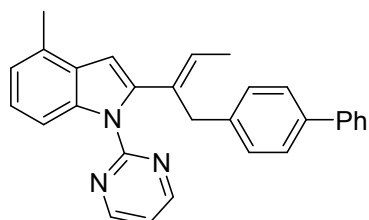

**Compound 3ea:** yellow oil (34.0 mg, 82%).  $^1\text{H}$  NMR (400 MHz, Chloroform-*d*) 1.84 (d,  $J = 6.9$  Hz, 3H), 2.48 (s, 3H), 3.56 (s, 2H), 5.95 (q,  $J = 7.0$  Hz, 1H), 6.50 (s, 1H), 6.96 (d,  $J = 7.2$  Hz, 1H), 7.05 – 7.17 (m, 4H), 7.28 (dd,  $J = 7.2$  Hz, 2H), 7.35 – 7.43 (m, 4H), 7.52 (d,  $J = 7.6$  Hz, 2H), 7.99 (d,  $J = 8.0$  Hz, 1H), 8.78 (d,  $J = 4.9$  Hz, 2H).  $^{13}\text{C}$  NMR (100 MHz, Chloroform-*d*)  $\delta$  14.5, 18.6, 36.5, 106.5, 110.9, 117.3, 122.3, 123.3, 126.6, 126.9, 127.0, 128.7, 128.9, 129.7, 133.3, 137.3, 138.6, 138.8, 141.1, 142.4, 158.3, 158.5. IR (neat)  $\nu$  3037, 2925, 2849, 1562, 1451, 1379, 1345, 1213, 1173, 1121, 1038  $\text{cm}^{-1}$ . HRMS (ESI) Calcd. for  $\text{C}_{29}\text{H}_{26}\text{N}_3$  requires ( $\text{M}^+\text{+H}$ ): 416.2121, Found: 416.2126.

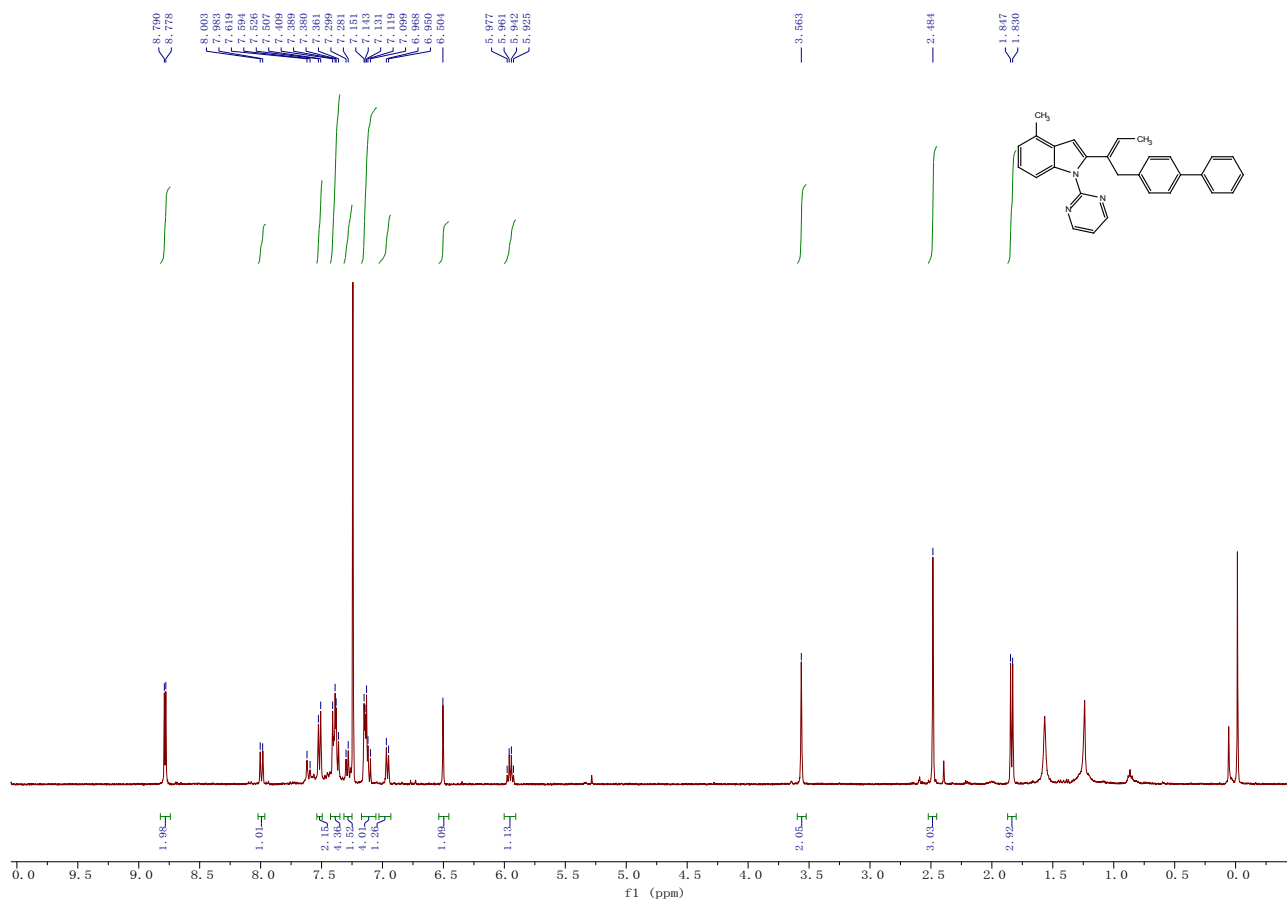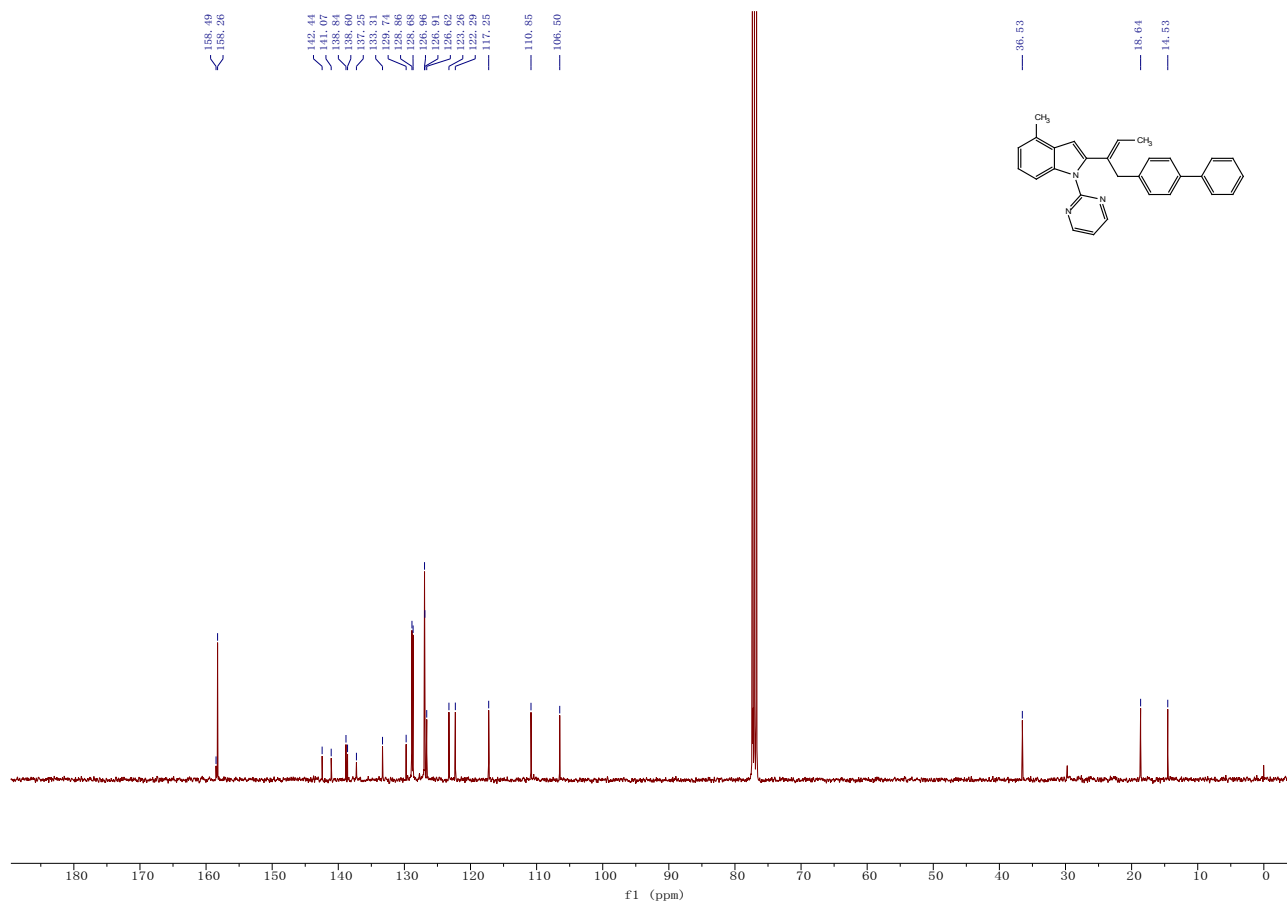

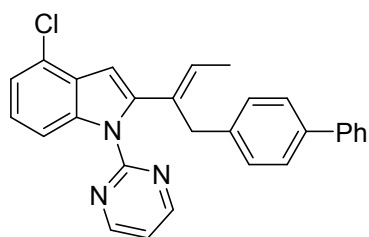

**Compound 3fa:** yellow oil (37.4 mg, 86%).  $^1\text{H}$  NMR (400 MHz, Chloroform-*d*)  $\delta$  1.84 (d,  $J = 7.0$  Hz, 3H), 3.57 (s, 2H), 5.98 (q,  $J = 7.0$  Hz, 1H), 6.60 (s, 1H), 7.13 (dd,  $J = 8.1, 3.6$  Hz, 3H), 7.15 – 7.21 (m, 1H), 7.28 (dd,  $J = 7.3$  Hz, 1H), 7.35 – 7.43 (m, 4H), 7.52 (d,  $J = 7.6$  Hz, 2H), 8.03 (d,  $J = 8.2$  Hz, 1H), 8.79 (d,  $J = 4.8$  Hz, 2H).  $^{13}\text{C}$  NMR (100 MHz, Chloroform-*d*)  $\delta$  14.6, 36.4, 105.8, 111.9, 117.8, 121.7, 123.7, 125.4, 127.0, 127.8, 128.0, 128.7, 128.8, 132.7, 138.0, 138.4, 138.7, 141.0, 143.7, 158.1, 158.4. IR (neat)  $\nu$  2922, 2849, 1561, 1507, 1451, 1380, 1348, 1213, 1173, 1121, 1038  $\text{cm}^{-1}$ . HRMS (ESI) Calcd. for  $\text{C}_{28}\text{H}_{23}\text{ClN}_3$  requires ( $\text{M}^+\text{+H}$ ): 436.1575, Found: 436.1575.

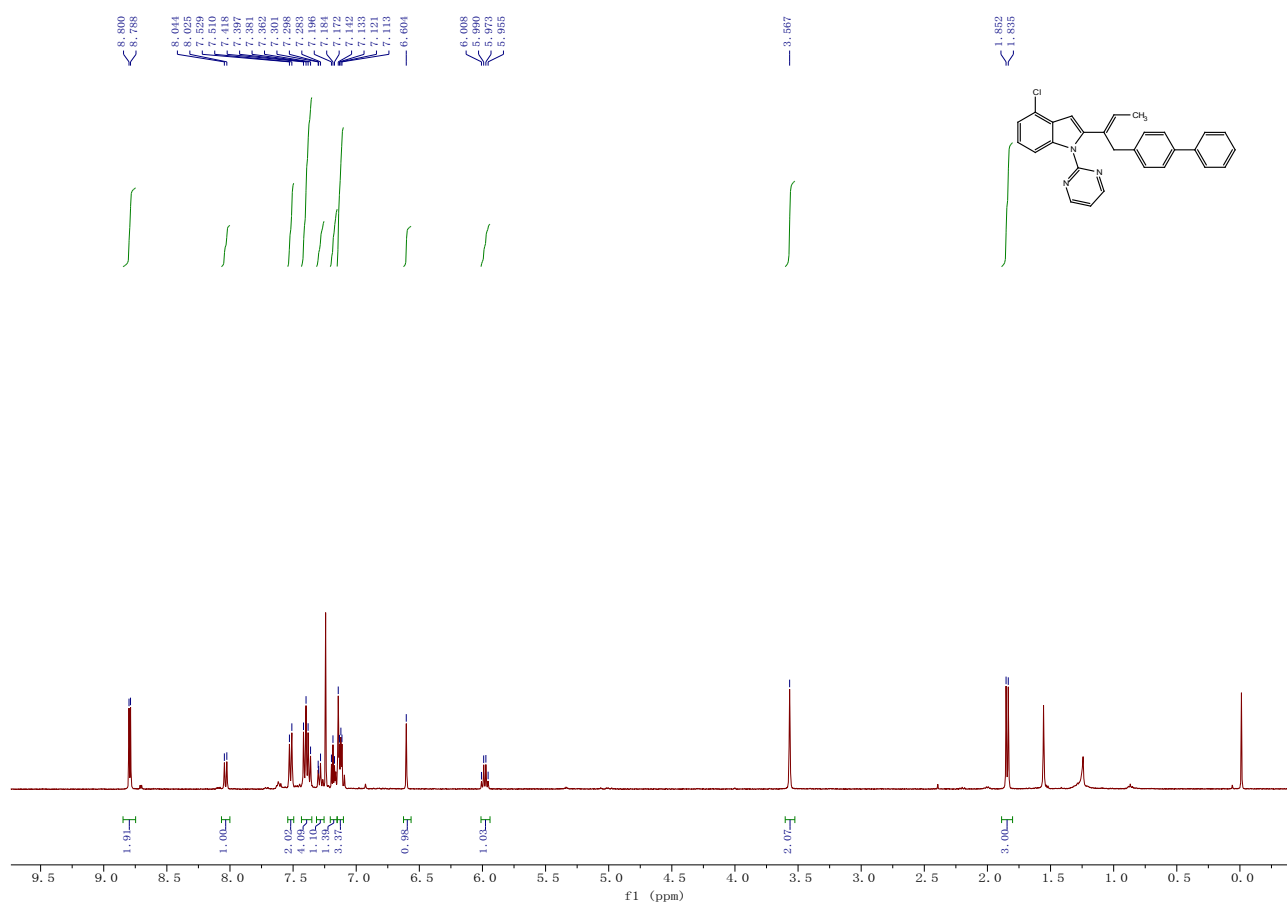

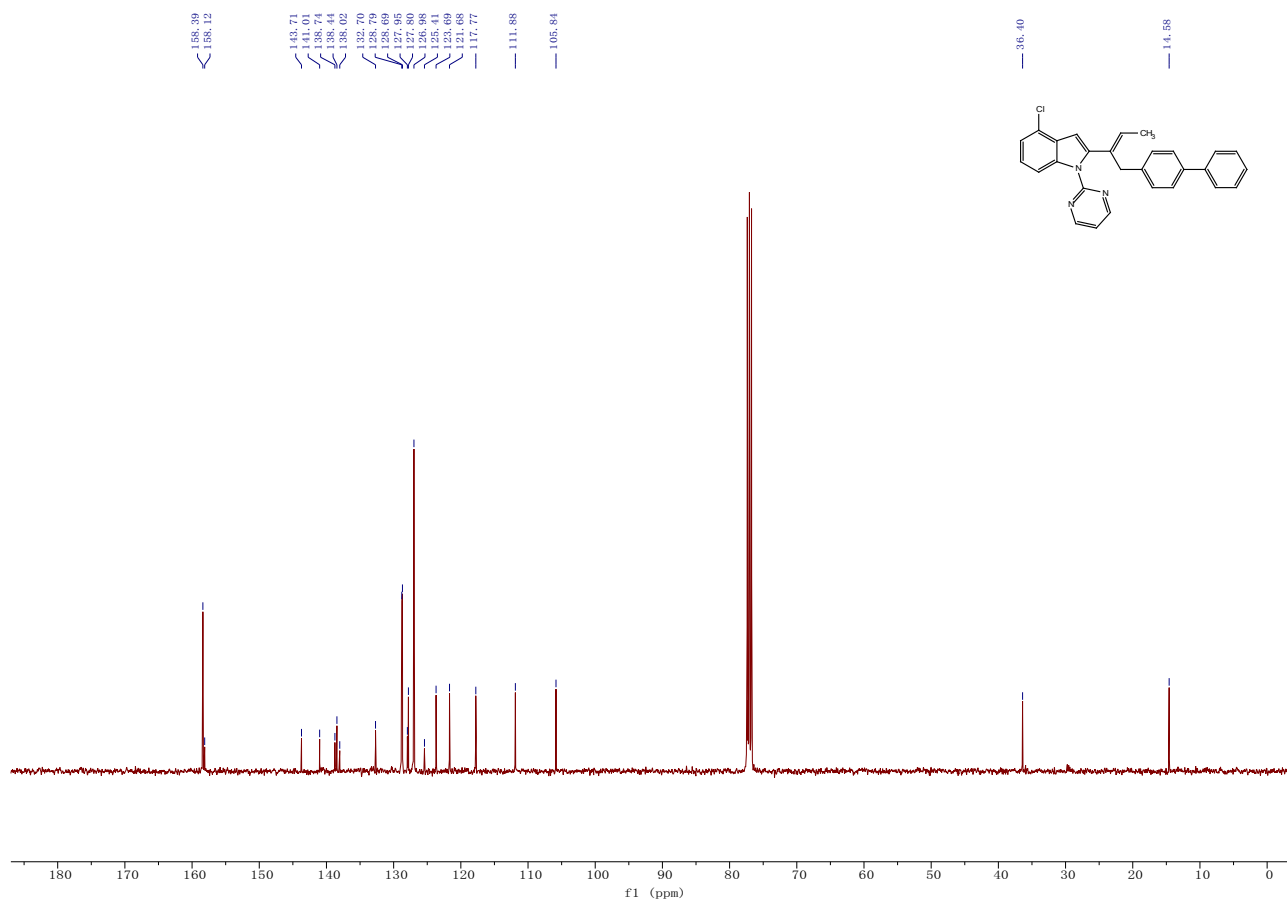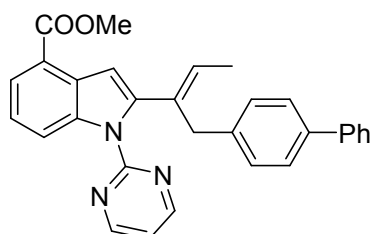

**Compound 3ga:** yellow oil (29.4 mg, 64%).  $^1\text{H}$  NMR (400 MHz, Chloroform-*d*)  $\delta$  1.86 (d,  $J = 7.0$  Hz, 3H), 3.58 (s, 2H), 3.94 (s, 3H), 6.05 (q,  $J = 6.9$  Hz, 1H), 7.11 – 7.24 (m, 5H), 7.26 – 7.31 (m, 2H), 7.35 – 7.43 (m, 4H), 7.52 (d,  $J = 7.8$  Hz, 2H), 7.93 (d,  $J = 7.6$  Hz, 1H), 8.34 (d,  $J = 8.3$  Hz, 1H), 8.80 (d,  $J = 4.8$  Hz, 2H).  $^{13}\text{C}$  NMR (100 MHz, Chloroform-*d*)  $\delta$  14.6, 36.4, 51.8, 108.6, 117.8, 121.1, 122.4, 125.0, 127.0, 127.0, 128.1, 128.7, 128.8, 129.2, 132.7, 138.2, 138.5, 138.7, 141.0, 145.2, 158.1, 158.4, 167.8. IR (neat)  $\nu$  3021, 2922, 2850, 1682, 1562, 1486, 1379, 1353, 1321, 1254, 1222, 1173, 1121, 1038  $\text{cm}^{-1}$ . HRMS (ESI) Calcd. for  $\text{C}_{30}\text{H}_{26}\text{N}_3\text{O}_2$  requires ( $\text{M}^+\text{+H}$ ): 460.2020, Found: 460.2023.

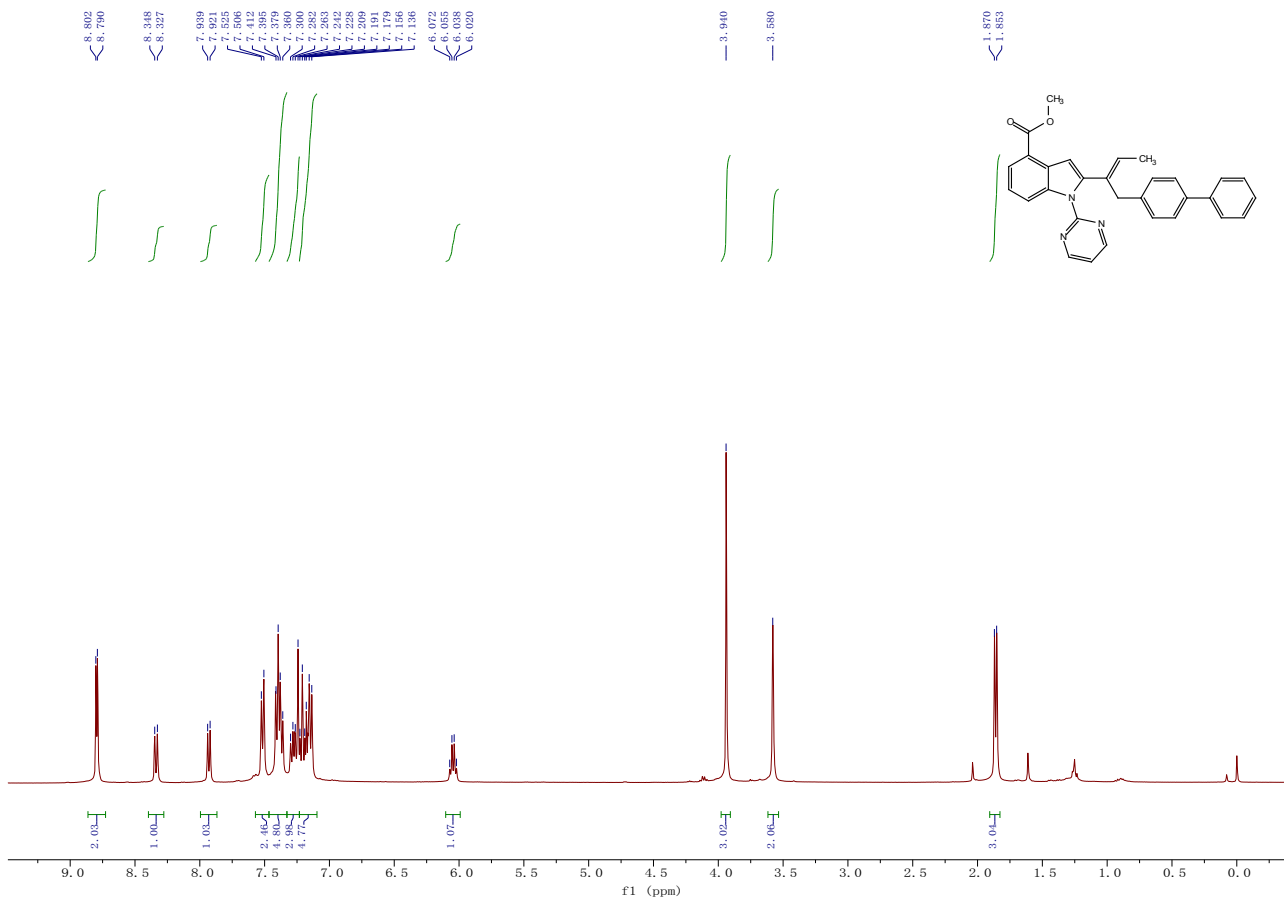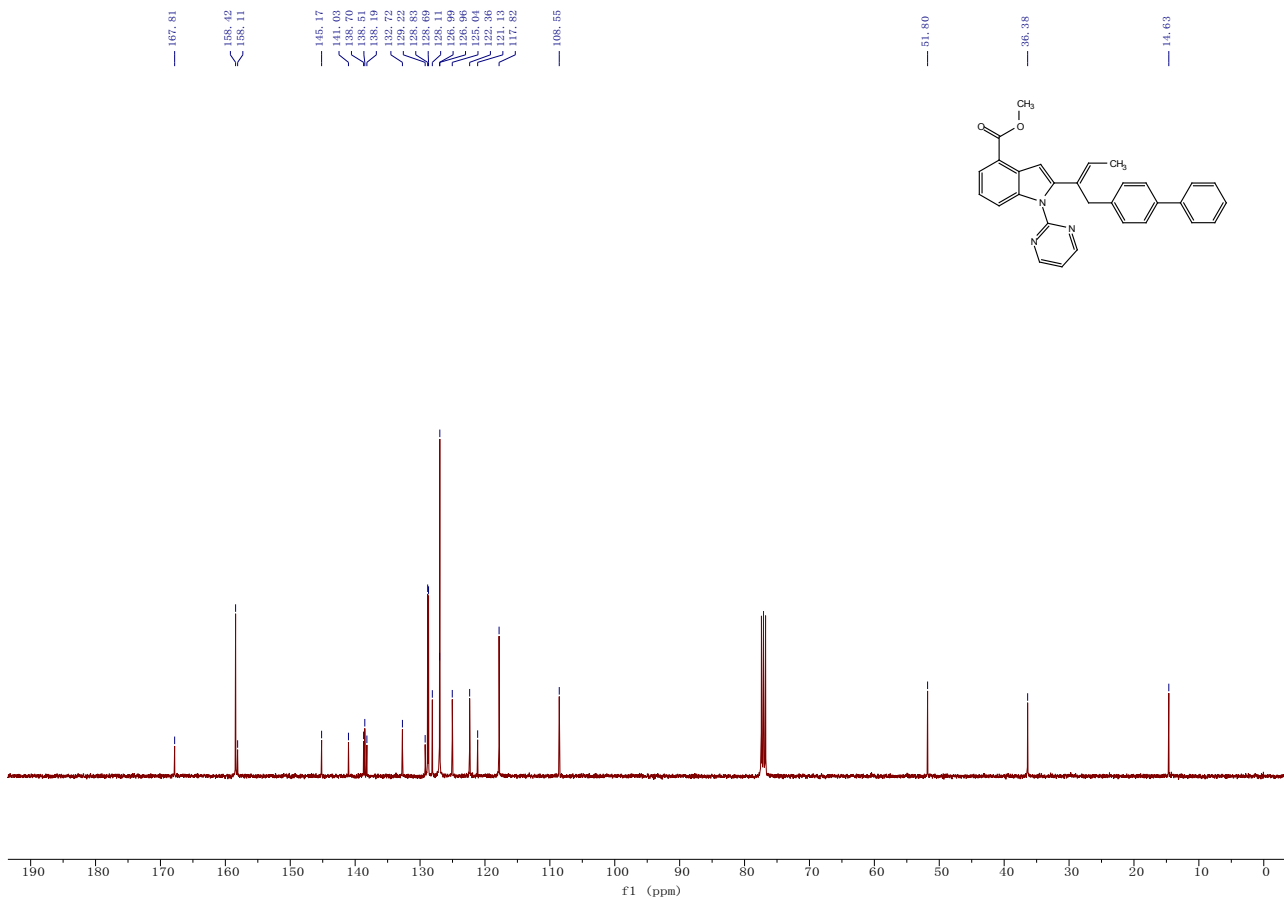

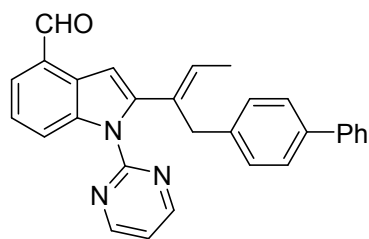

**Compound 3ha:** yellow oil (33.5 mg, 78%).  $^1\text{H}$  NMR (400 MHz, Chloroform-*d*)  $\delta$  1.88 (d,  $J = 6.9$  Hz, 3H), 3.59 (s, 2H), 6.09 (q,  $J = 7.0$  Hz, 1H), 7.14 (d,  $J = 8.0$  Hz, 2H), 7.24 (d,  $J = 4.8$  Hz, 2H), 7.29 – 7.44 (m, 7H), 7.52 (d,  $J = 7.3$  Hz, 2H), 7.68 (d,  $J = 7.3$  Hz, 1H), 8.39 (d,  $J = 8.2$  Hz, 1H), 8.84 (d,  $J = 4.8$  Hz, 2H), 10.23 (s, 1H).  $^{13}\text{C}$  NMR (100 MHz, Chloroform-*d*)  $\delta$  14.7, 36.3, 107.4, 118.1, 119.2, 122.5, 127.0, 127.7, 127.8, 128.5, 128.67, 128.74, 132.5, 138.2, 138.3, 138.7, 141.0, 146.7, 158.0, 158.5, 192.8. IR (neat)  $\nu$  3027, 2921, 2850, 1681, 1563, 1519, 1486, 1354, 1321, 1223, 1163, 1087, 1039  $\text{cm}^{-1}$ . HRMS (ESI) Calcd. for  $\text{C}_{29}\text{H}_{24}\text{N}_3\text{O}$  requires ( $\text{M}^++\text{H}$ ): 430.1914, Found: 430.1921.

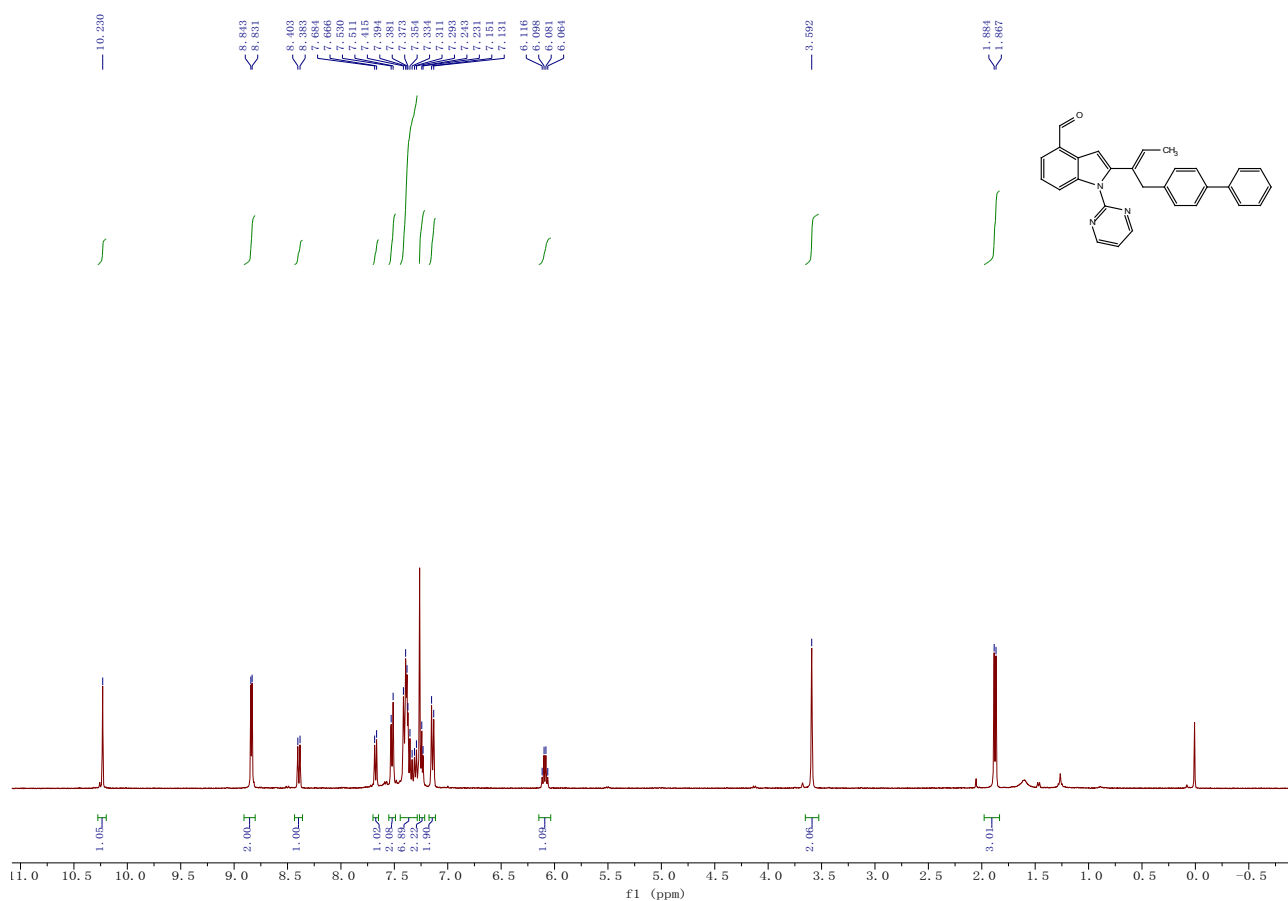



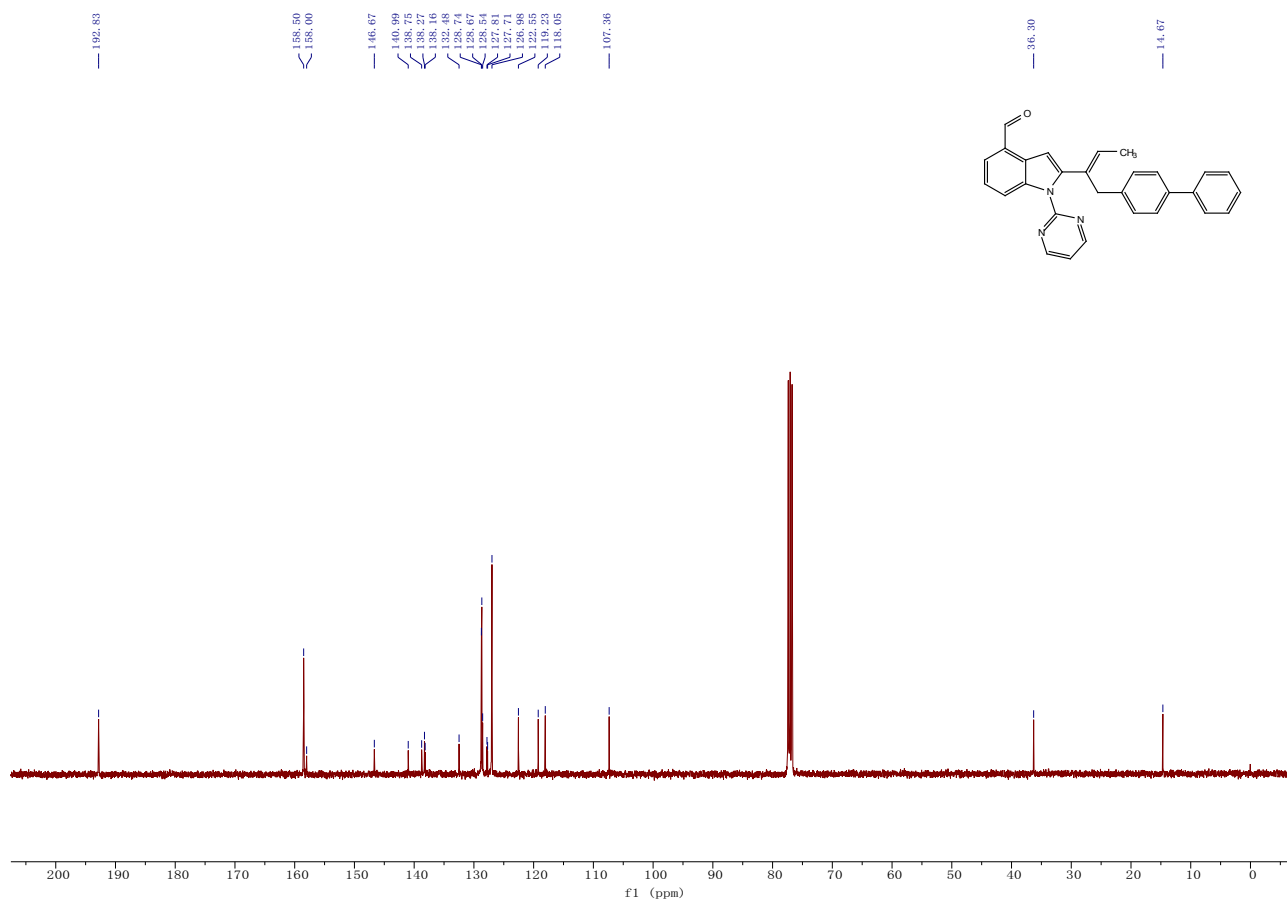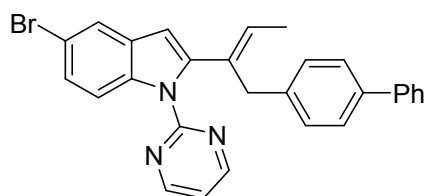

**Compound 3ia:** yellow oil (35.0 mg, 73%).  $^1\text{H}$  NMR (400 MHz, Chloroform-*d*)  $\delta$  1.85 (d,  $J = 7.0$  Hz, 3H), 3.57 (s, 2H), 5.92 (q,  $J = 7.2$  Hz, 1H), 6.37 (s, 1H), 7.05 – 7.14 (m, 2H), 7.17 (dd,  $J = 4.8$  Hz, 1H), 7.24 – 7.33 (m, 1H), 7.34 – 7.49 (m, 4H), 7.49 – 7.55 (m, 2H), 7.61 (d,  $J = 2.0$  Hz, 1H), 8.06 (d,  $J = 8.8$  Hz, 1H), 8.78 (d,  $J = 4.8$  Hz, 2H).  $^{13}\text{C}$  NMR (100 MHz, Chloroform-*d*)  $\delta$  14.5, 36.5, 107.2, 115.0, 115.1, 117.6, 122.8, 125.8, 127.0, 127.02, 127.4, 128.7, 128.8, 131.0, 132.9, 136.0, 138.5, 138.8, 141.0, 144.1, 158.1, 158.3. IR (neat)  $\nu$  3026, 2925, 2844, 1569, 1486, 1465, 1449, 1345, 1337, 1257, 1147, 1110, 1057  $\text{cm}^{-1}$ . HRMS (ESI) Calcd. for  $\text{C}_{28}\text{H}_{23}\text{BrN}_3$  requires ( $\text{M}^+\text{+H}$ ): 480.1070, Found: 480.1063.

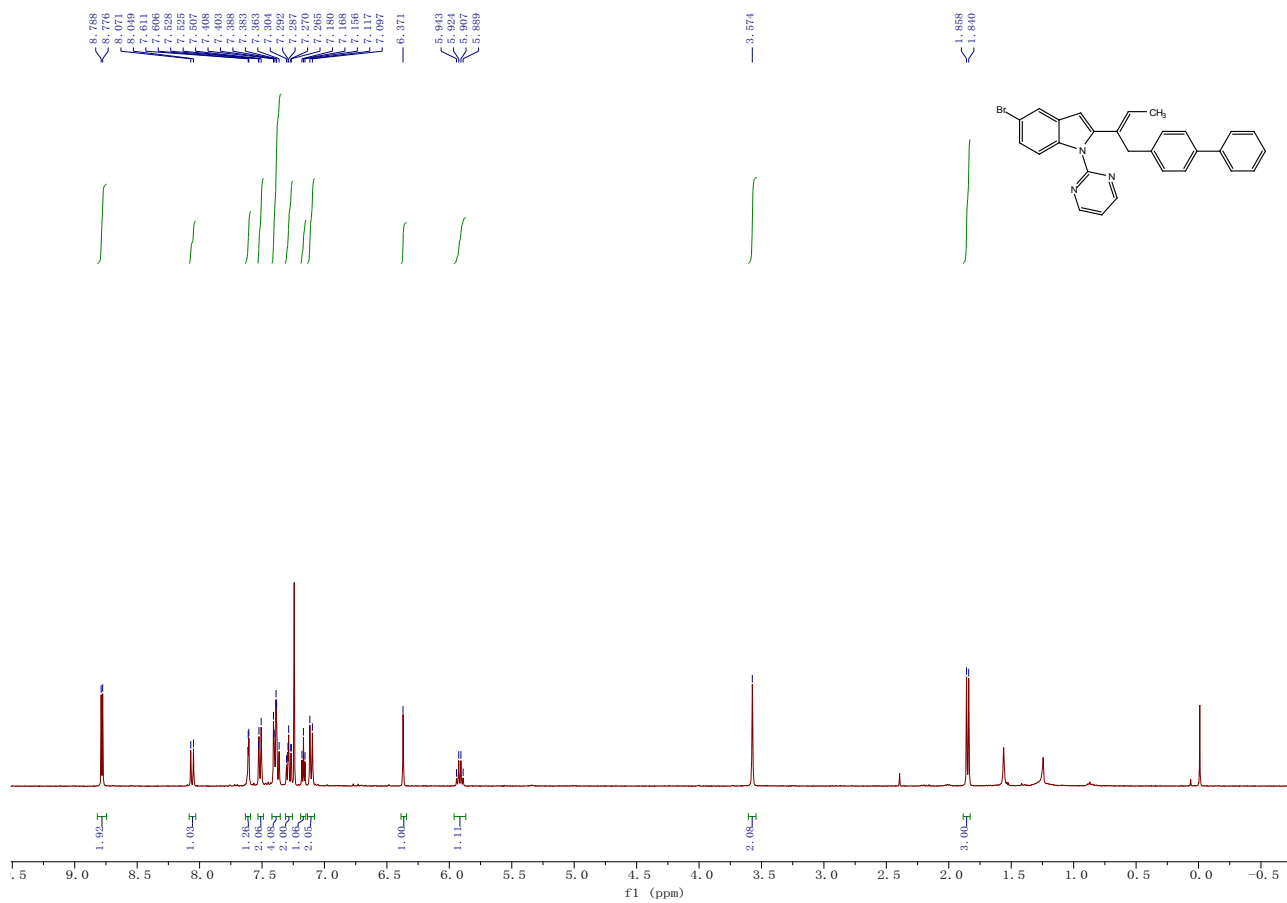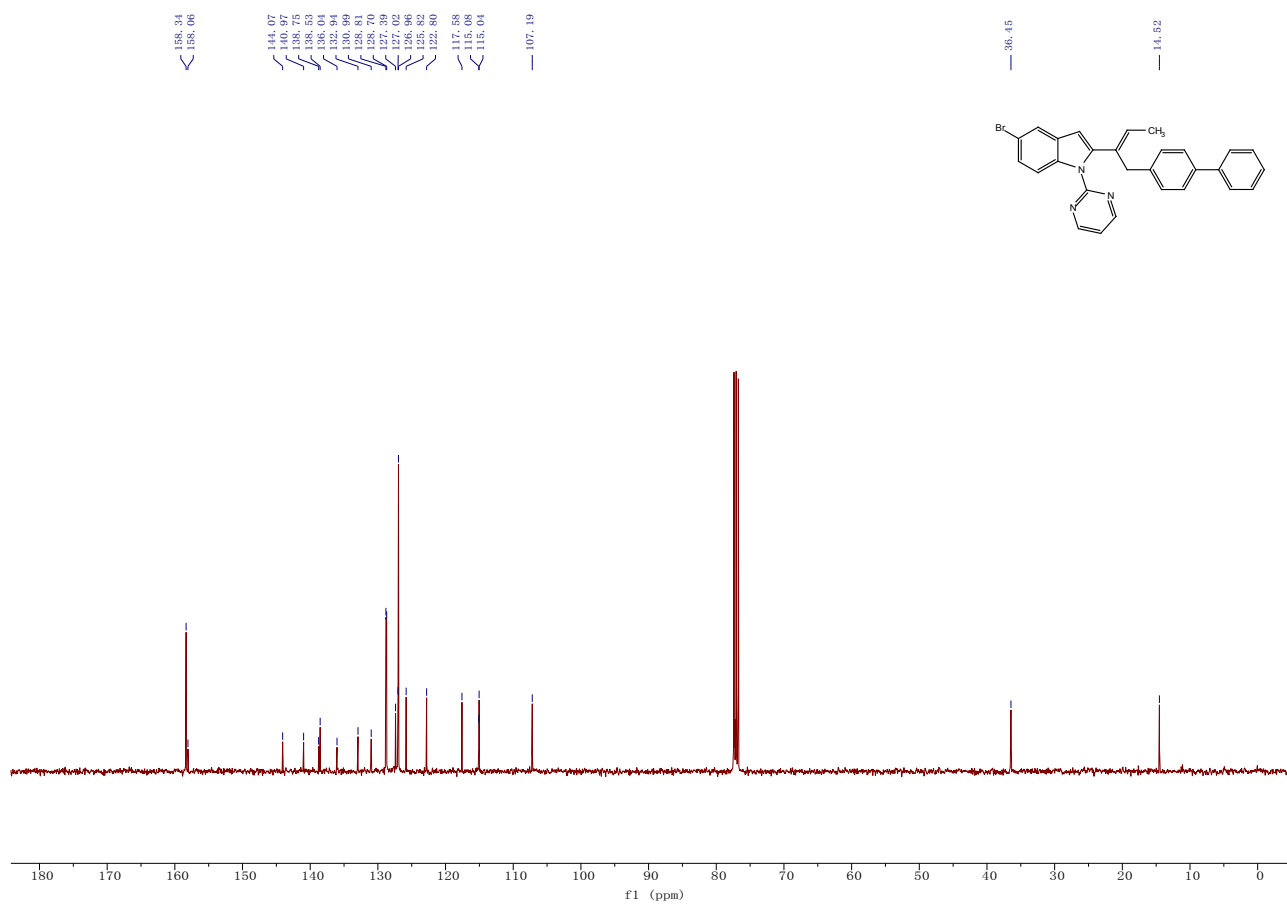

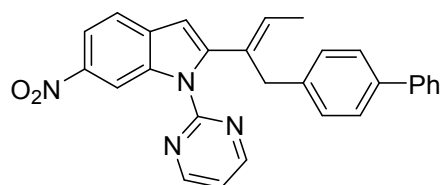

**Compound 3ka:** yellow oil (34.3 mg, 77%).  $^1\text{H}$  NMR (400 MHz, Chloroform-*d*)  $\delta$  1.89 (d,  $J = 7.0$  Hz, 3H), 3.64 (s, 2H), 5.98 (q,  $J = 6.9$  Hz, 1H), 6.51 (s, 1H), 7.14 (d,  $J = 8.0$  Hz, 2H), 7.25 (dd,  $J = 4.3$  Hz, 1H), 7.30 (dd,  $J = 7.3$  Hz, 1H), 7.37 – 7.46 (m, 4H), 7.49 – 7.57 (m, 3H), 8.07 (dd,  $J = 8.7$ , 2.0 Hz, 1H), 8.85 (d,  $J = 4.9$  Hz, 2H), 9.09 (s, 1H).  $^{13}\text{C}$  NMR (100 MHz, Chloroform-*d*)  $\delta$  14.6, 36.3, 107.7, 110.5, 117.5, 118.5, 120.1, 126.9, 127.1, 127.15, 128.77, 128.81, 129.0, 129.8, 132.5, 134.2, 136.0, 138.1, 138.9, 140.8, 143.9, 148.5, 157.5, 158.5, 158.7. IR (neat)  $\nu$  3057, 3016, 1763, 1693, 1654, 1593, 1572, 1489, 1444, 1419, 1348, 1276, 1211, 1075  $\text{cm}^{-1}$ . HRMS (ESI) Calcd. for  $\text{C}_{28}\text{H}_{23}\text{N}_4\text{O}_2$  requires ( $\text{M}^++\text{H}$ ): 447.1816, Found: 447.1817.

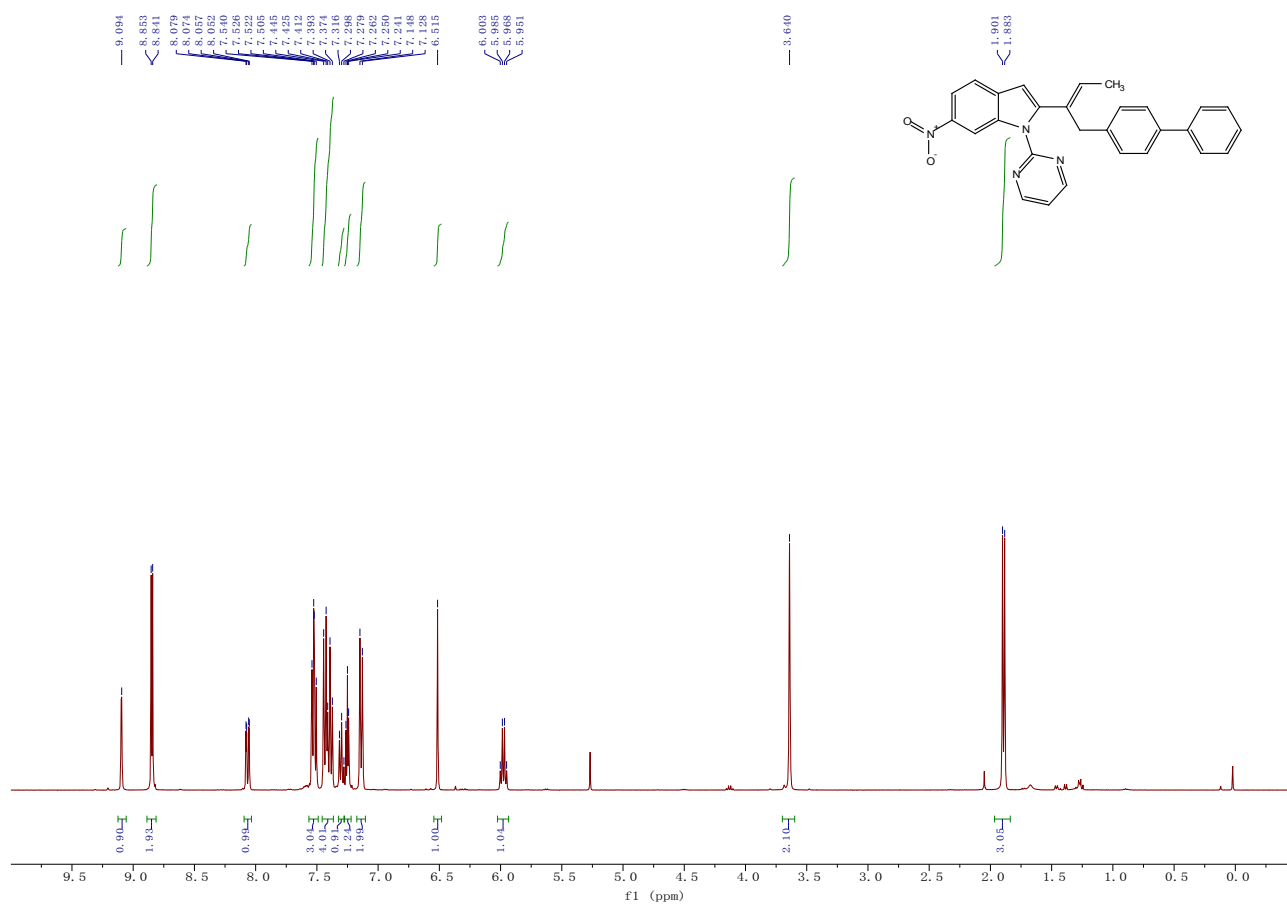

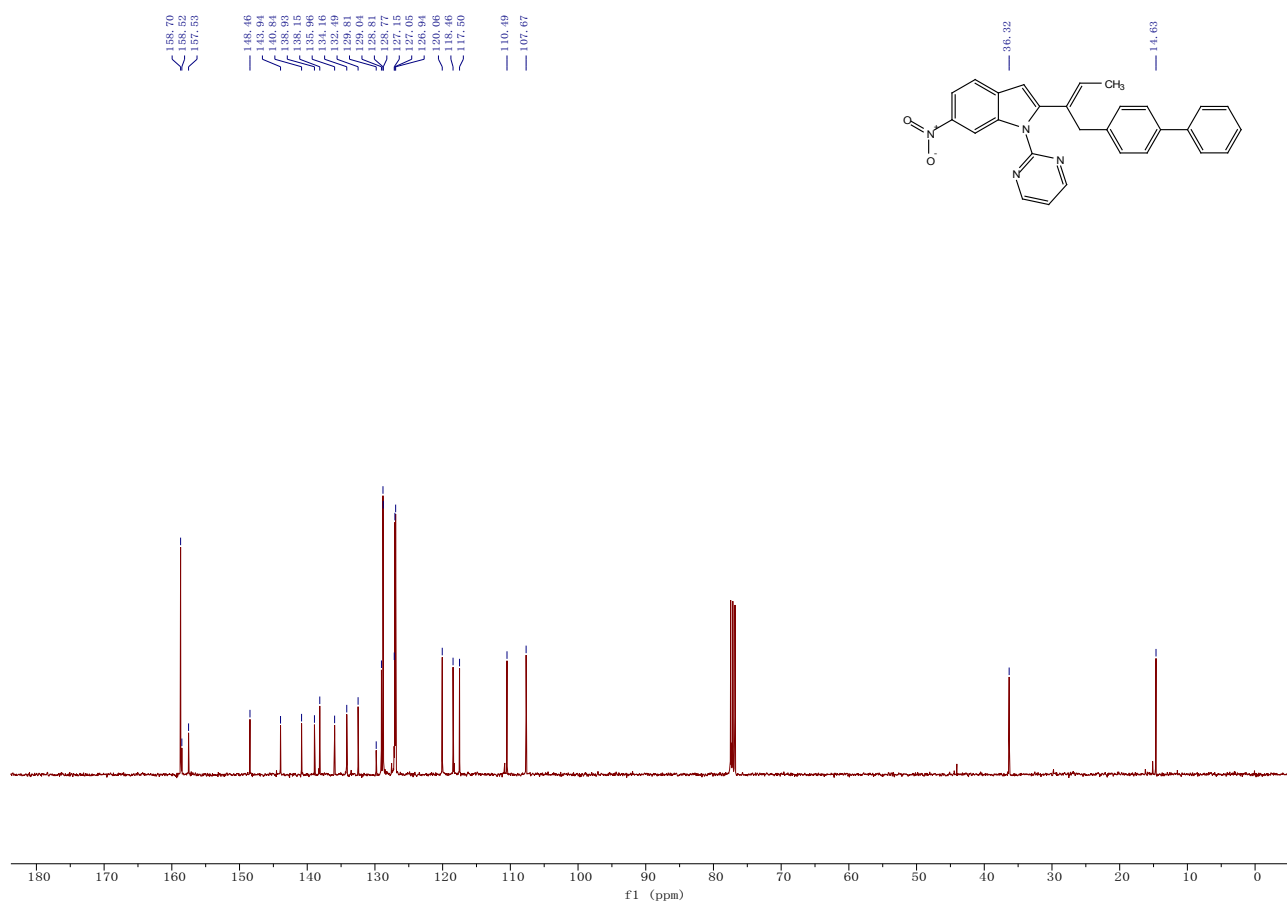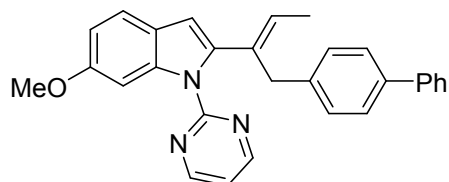

**Compound 31a:** yellow oil (29.7 mg, 69%).  $^1\text{H}$  NMR (400 MHz, Chloroform-*d*)  $\delta$  1.83 (d,  $J = 7.0$  Hz, 3H), 3.57 (s, 2H), 3.85 (s, 3H), 5.88 (q,  $J = 7.0$  Hz, 1H), 6.40 (s, 1H), 6.83 (dd,  $J = 8.5, 2.3$  Hz, 1H), 7.10 – 7.18 (m, 3H), 7.29 (dd,  $J = 6.8$  Hz, 1H), 7.35 – 7.45 (m, 5H), 7.49 – 7.56 (m, 2H), 7.81 (d,  $J = 2.3$  Hz, 1H), 8.78 (d,  $J = 4.8$  Hz, 2H).  $^{13}\text{C}$  NMR (100 MHz, Chloroform-*d*)  $\delta$  14.5, 36.5, 55.8, 98.1, 108.0, 110.8, 117.2, 120.7, 123.4, 126.0, 126.9, 127.0, 128.7, 128.9, 133.2, 138.4, 138.6, 138.9, 141.1, 142.0, 157.2, 158.2, 158.5. IR (neat)  $\nu$  2919, 2850, 1556, 1507, 1485, 1342, 1312, 1225, 1180, 1056, 1038  $\text{cm}^{-1}$ . HRMS (ESI) Calcd. for  $\text{C}_{29}\text{H}_{26}\text{N}_3\text{O}$  requires ( $\text{M}^++\text{H}$ ): 432.2076, Found: 432.2070.

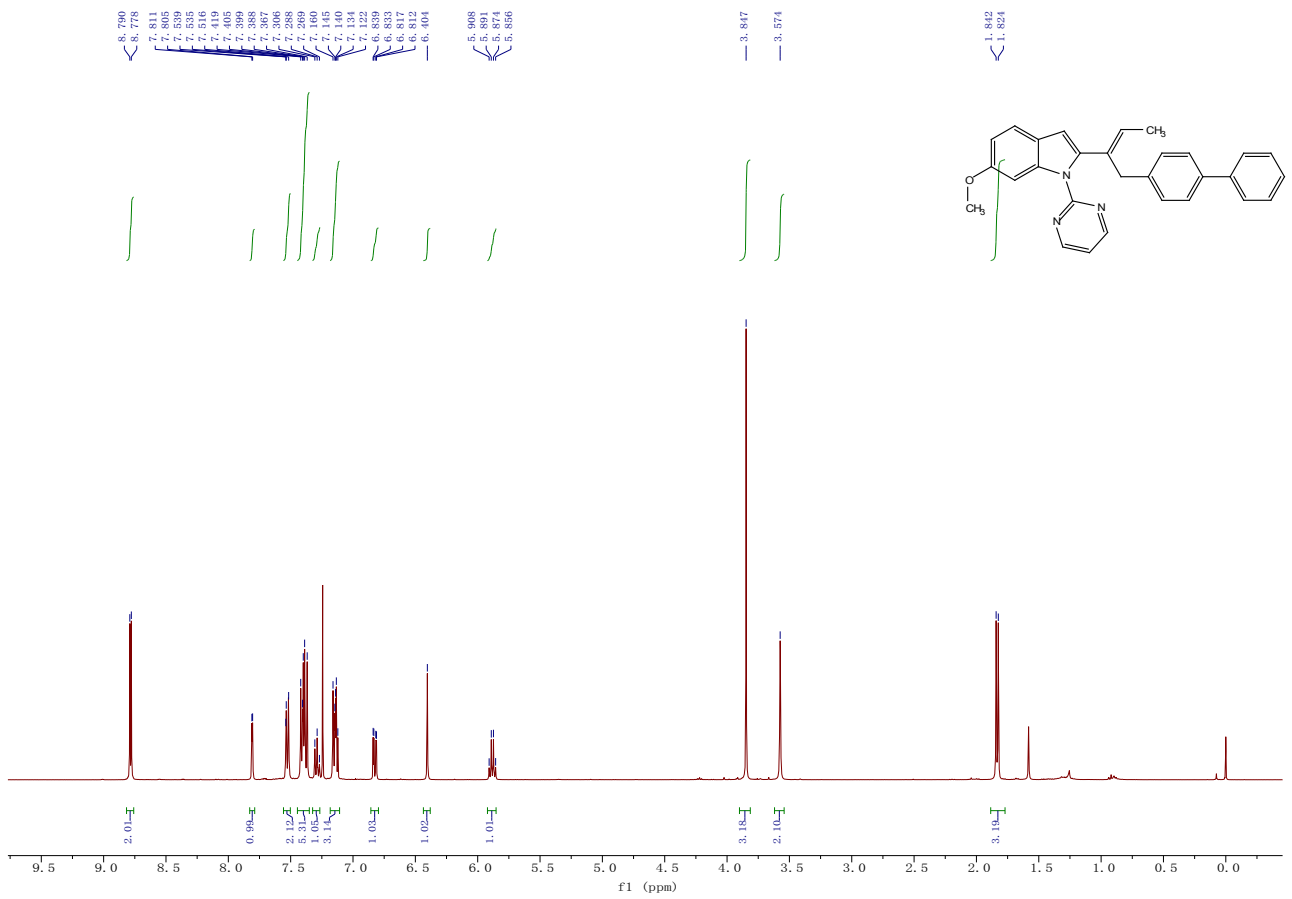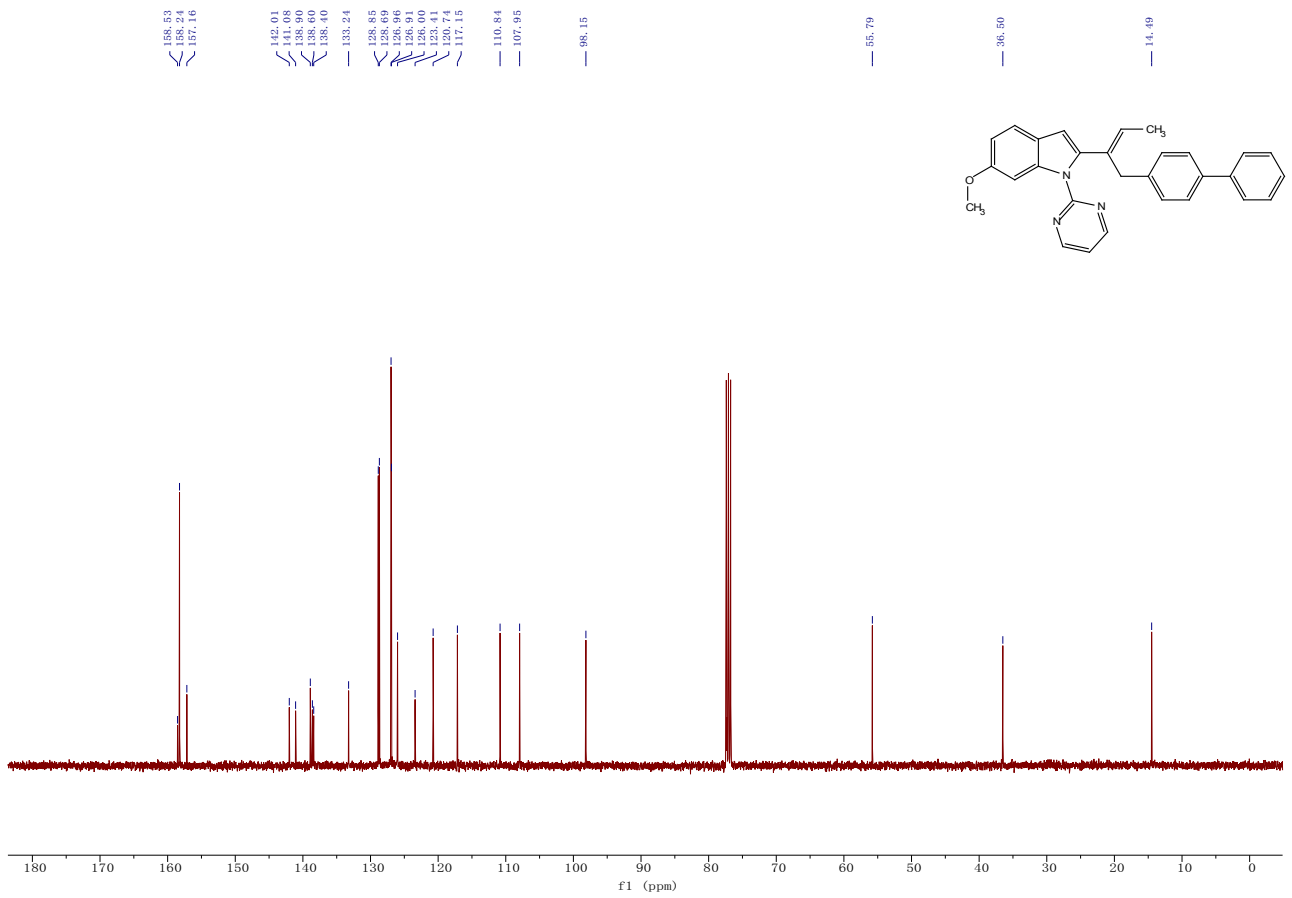

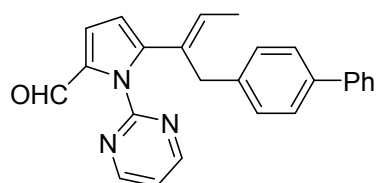

**Compound 3ma:** yellow oil (16.3 mg, 43%).  $^1\text{H}$  NMR (400 MHz, Chloroform-*d*)  $\delta$  1.70 (d,  $J = 7.0$  Hz, 3H), 3.57 (s, 2H), 5.74 (q,  $J = 7.0$  Hz, 1H), 6.13 (d,  $J = 4.0$  Hz, 1H), 7.00 (d,  $J = 4.0$  Hz, 1H), 7.15 (d,  $J = 8.4$  Hz, 2H), 7.29 – 7.37 (m, 2H), 7.37 – 7.47 (m, 4H), 7.56 (d,  $J = 7.2$  Hz, 2H), 8.81 (d,  $J = 4.8$  Hz, 2H), 9.50 (s, 1H).  $^{13}\text{C}$  NMR (100 MHz, Chloroform-*d*)  $\delta$  14.5, 35.8, 111.4, 120.2, 123.0, 126.9, 127.0, 127.1, 128.66, 128.73, 129.7, 130.4, 133.5, 137.8, 138.9, 140.9, 144.9, 158.1, 158.5, 178.5. IR (neat)  $\nu$  3047, 2912, 2846, 1682, 1559, 1486, 1342, 1312, 1225, 1180, 1059, 1007  $\text{cm}^{-1}$ . HRMS (ESI) Calcd. for  $\text{C}_{25}\text{H}_{22}\text{N}_3\text{O}$  requires ( $\text{M}^++\text{H}$ ): 380.1757, Found: 380.1764.

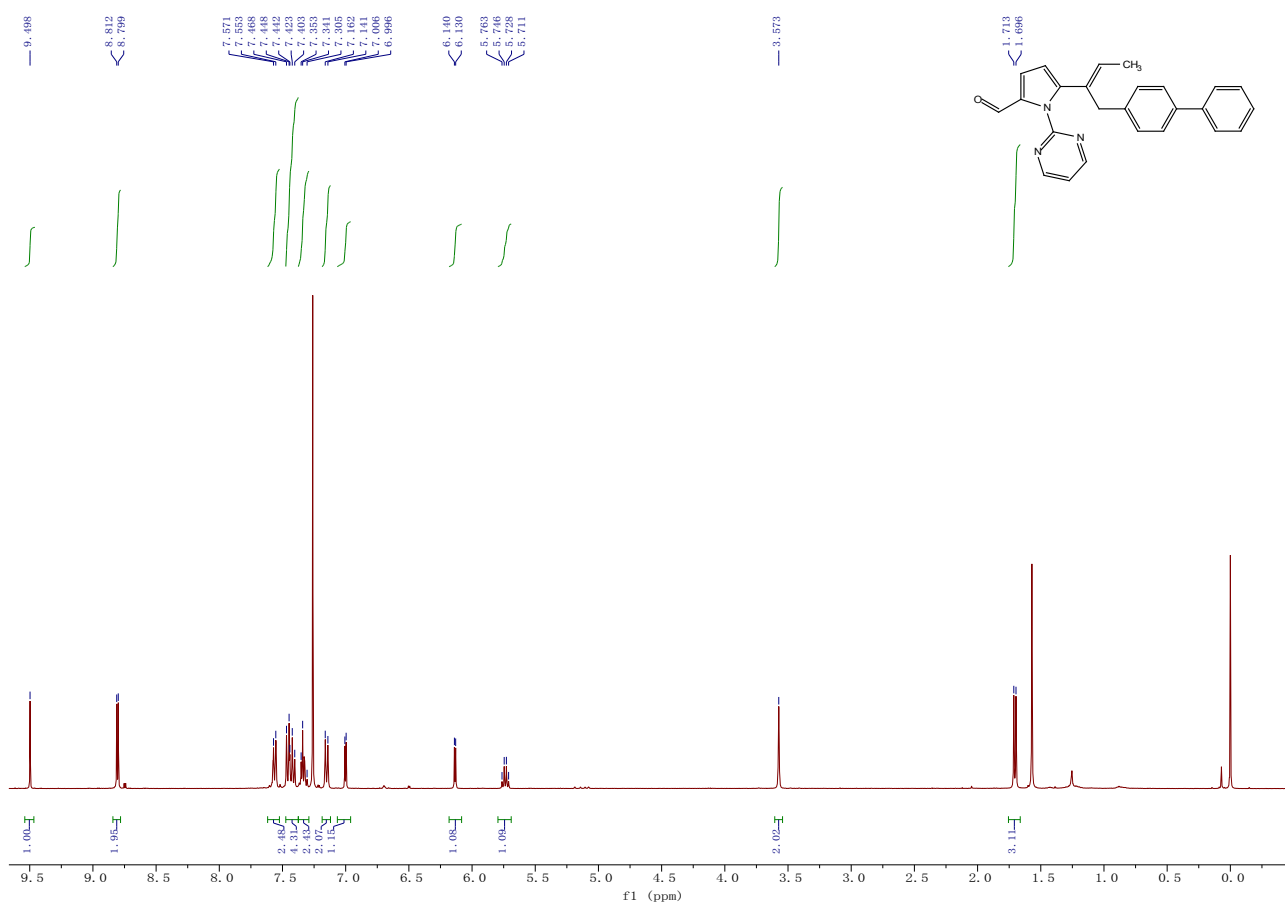

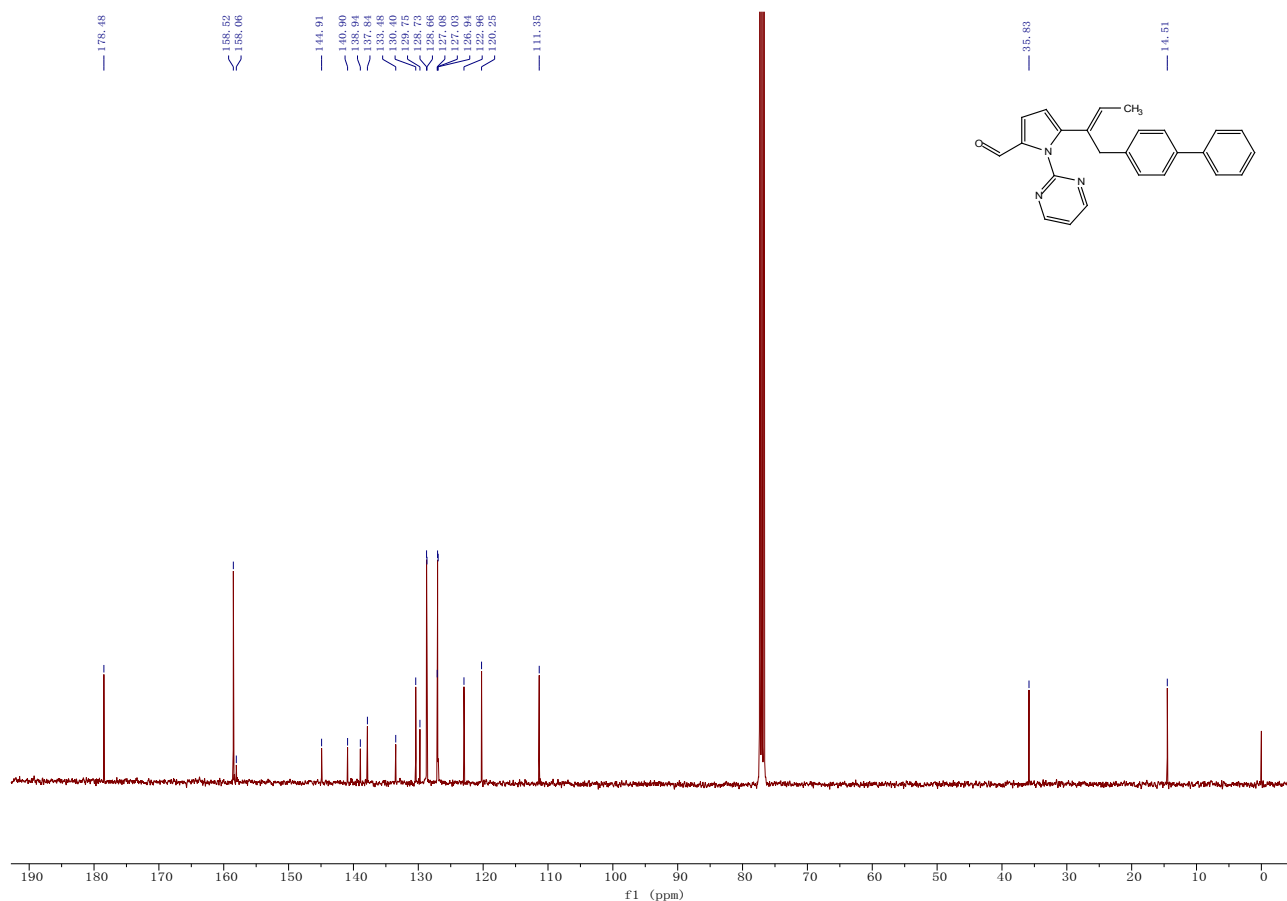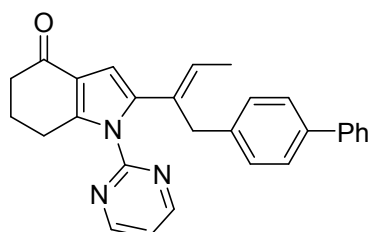

**Compound 3na:** yellow oil (15.9 mg, 38%).  $^1\text{H}$  NMR (400 MHz, Chloroform-*d*)  $^1\text{H}$  NMR (400 MHz, Chloroform-*d*)  $\delta$  1.71 (d,  $J = 6.9$  Hz, 3H), 2.09 (q,  $J = 6.3$  Hz, 2H), 2.17 (q,  $J = 6.3$  Hz, 2H), 2.47 (t,  $J = 6.4$  Hz, 2H), 2.56 (t,  $J = 6.4$  Hz, 2H), 2.85 (t,  $J = 6.2$  Hz, 2H), 3.00 (t,  $J = 6.2$  Hz, 2H), 3.45 (s, 2H), 4.91 – 5.08 (m, 2H), 5.61 (q,  $J = 6.9$  Hz, 1H), 6.48 (s, 1H), 6.61 – 6.72 (m, 1H), 6.77 (d,  $J = 15.5$  Hz, 2H), 7.14 (d,  $J = 8.0$  Hz, 2H), 7.15 – 7.22 (m, 2H), 7.26 – 7.48 (m, 13H), 7.51 – 7.63 (m, 7H), 8.70 (d,  $J = 4.8$  Hz, 2H), 8.79 (d,  $J = 4.8$  Hz, 2H).  $^{13}\text{C}$  NMR (100 MHz, Chloroform-*d*)  $\delta$  14.5, 35.8, 111.4, 120.2, 123.0, 126.9, 127.0, 127.1, 128.66, 128.73, 129.7, 130.4, 133.5, 137.8, 138.9, 140.9, 144.9, 158.1, 158.5, 178.5. IR (neat)  $\nu$  3063, 3021, 1693, 1593, 1573, 1486, 1342, 1312, 1276, 1225, 1150, 1069, 1018  $\text{cm}^{-1}$ . HRMS (ESI) Calcd. for  $\text{C}_{28}\text{H}_{25}\text{N}_3\text{O}$  requires ( $\text{M}^+\text{H}$ ): 419.1998, Found: 419.1995.

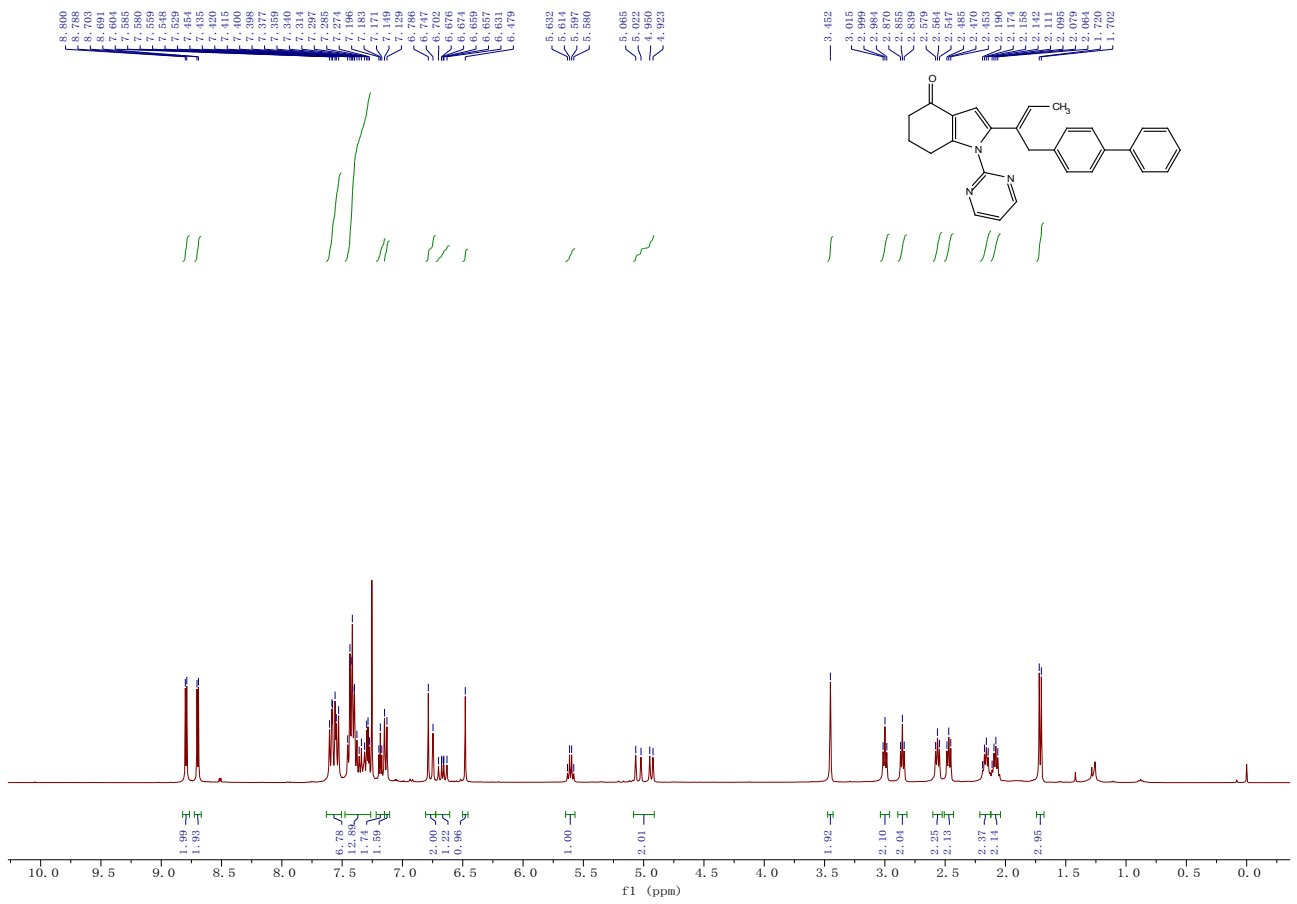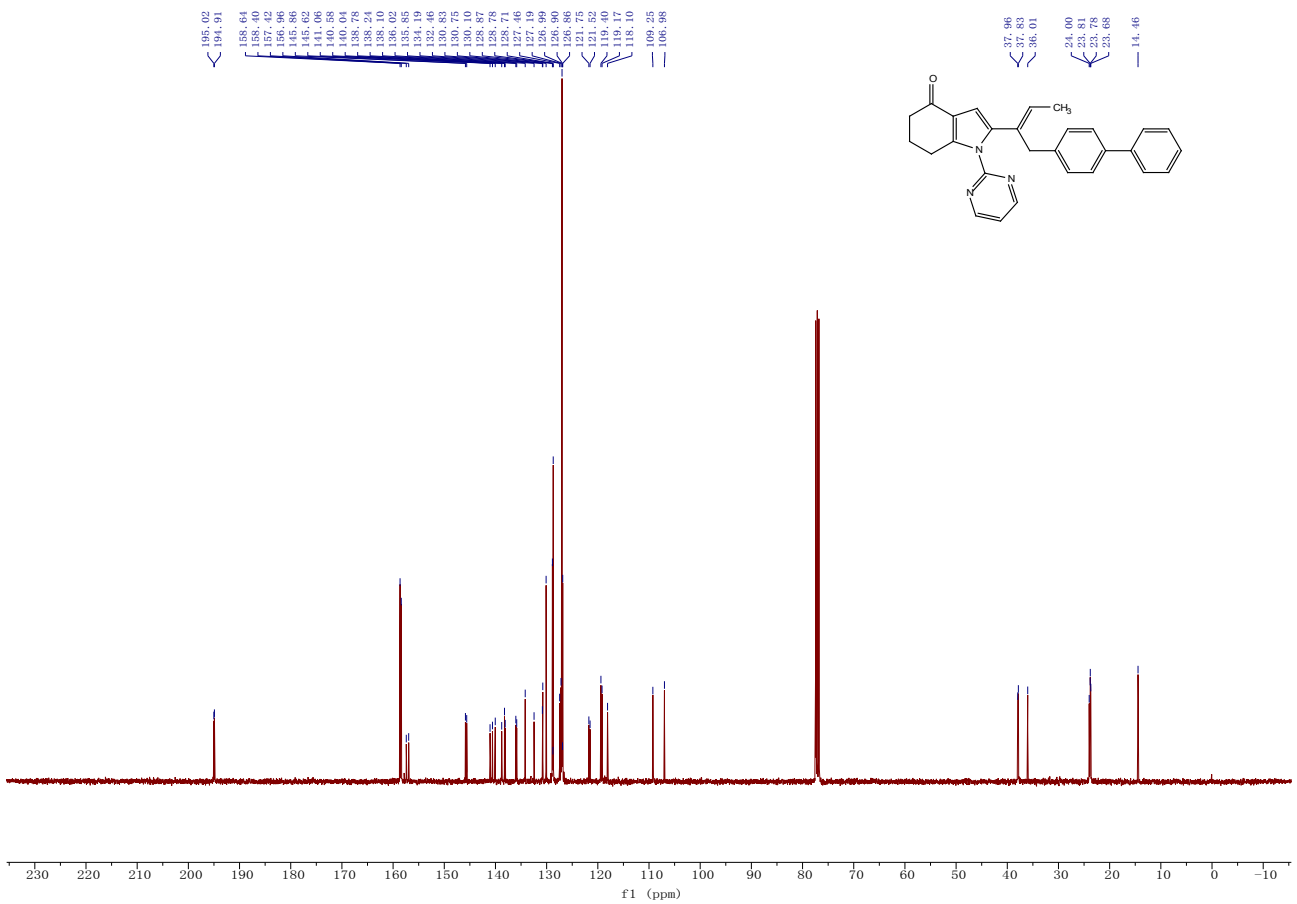



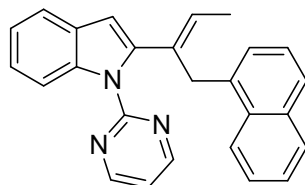

**Compound 3ab:** yellow oil (33.4 mg, 89%).  $^1\text{H}$  NMR (400 MHz, Chloroform-*d*)  $\delta$  1.86 (d,  $J = 7.0$  Hz, 3H), 3.76 (s, 2H), 5.94 (q,  $J = 7.1$  Hz, 1H), 6.46 (s, 1H), 7.11 – 7.26 (m, 4H), 7.34 – 7.45 (m, 2H), 7.49 (d,  $J = 7.6$  Hz, 1H), 7.57 (s, 1H), 7.64 – 7.79 (m, 3H), 8.18 (d,  $J = 7.7$  Hz, 1H), 8.80 (s, 2H).  $^{13}\text{C}$  NMR (100 MHz, Chloroform-*d*)  $\delta$  14.5, 23.7, 23.8, 23.8, 24.0, 36.0, 37.8, 107.0, 109.2, 118.1, 119.2, 119.4, 121.5, 121.8, 126.9, 127.0, 127.2, 127.5, 128.7, 128.9, 130.1, 130.8, 130.8, 132.5, 134.2, 135.8, 136.0, 138.1, 138.2, 138.8, 140.0, 140.6, 141.1, 145.6, 145.9, 157.0, 157.4, 158.4, 158.6, 194.9, 195.0. IR (neat)  $\nu$  3042, 2917, 2852, 1561, 1486, 1342, 1312, 1225, 1180, 1059, 1007  $\text{cm}^{-1}$ . HRMS (ESI) Calcd. for  $\text{C}_{26}\text{H}_{22}\text{N}_3$  requires ( $\text{M}^+\text{+H}$ ): 376.1808, Found: 376.1823.

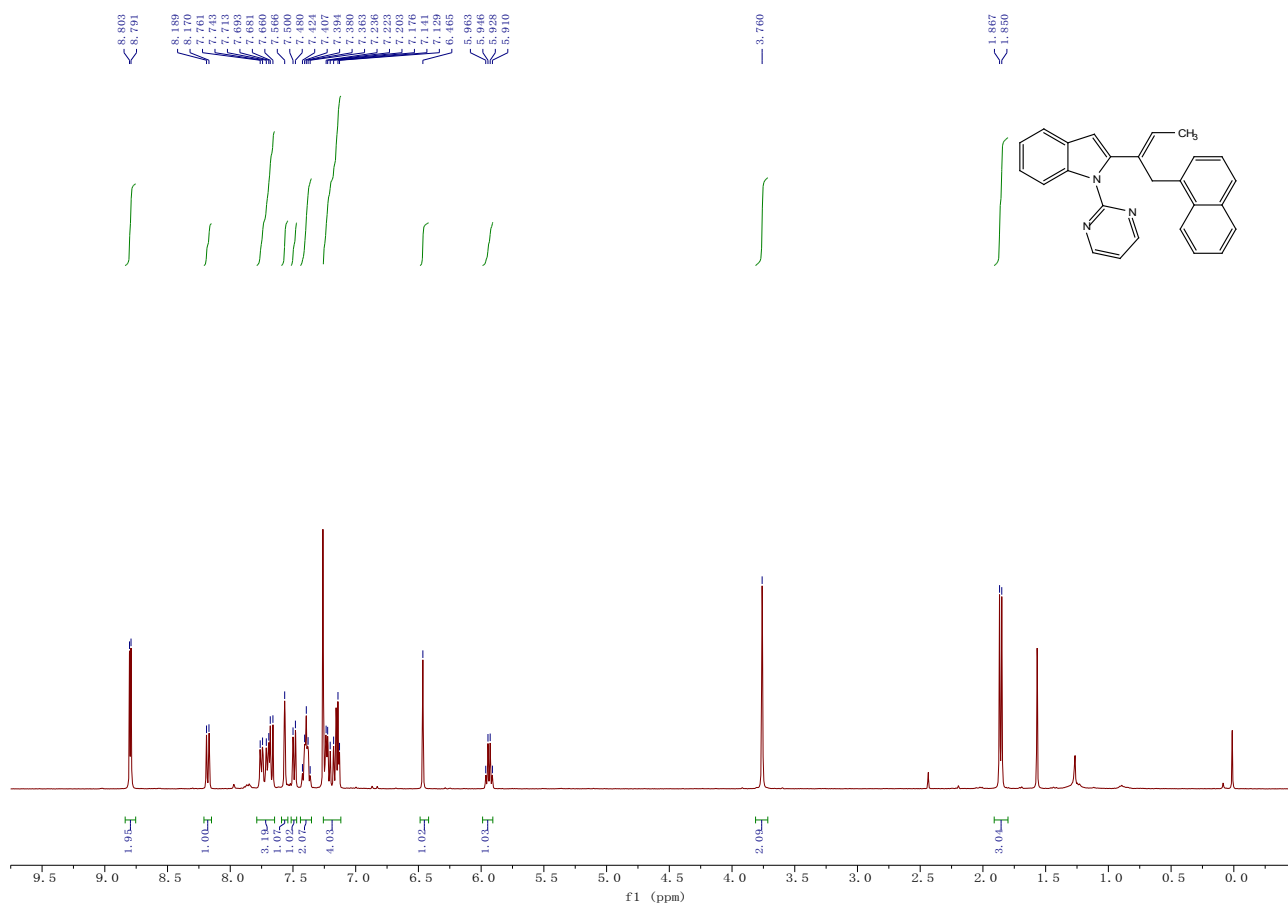

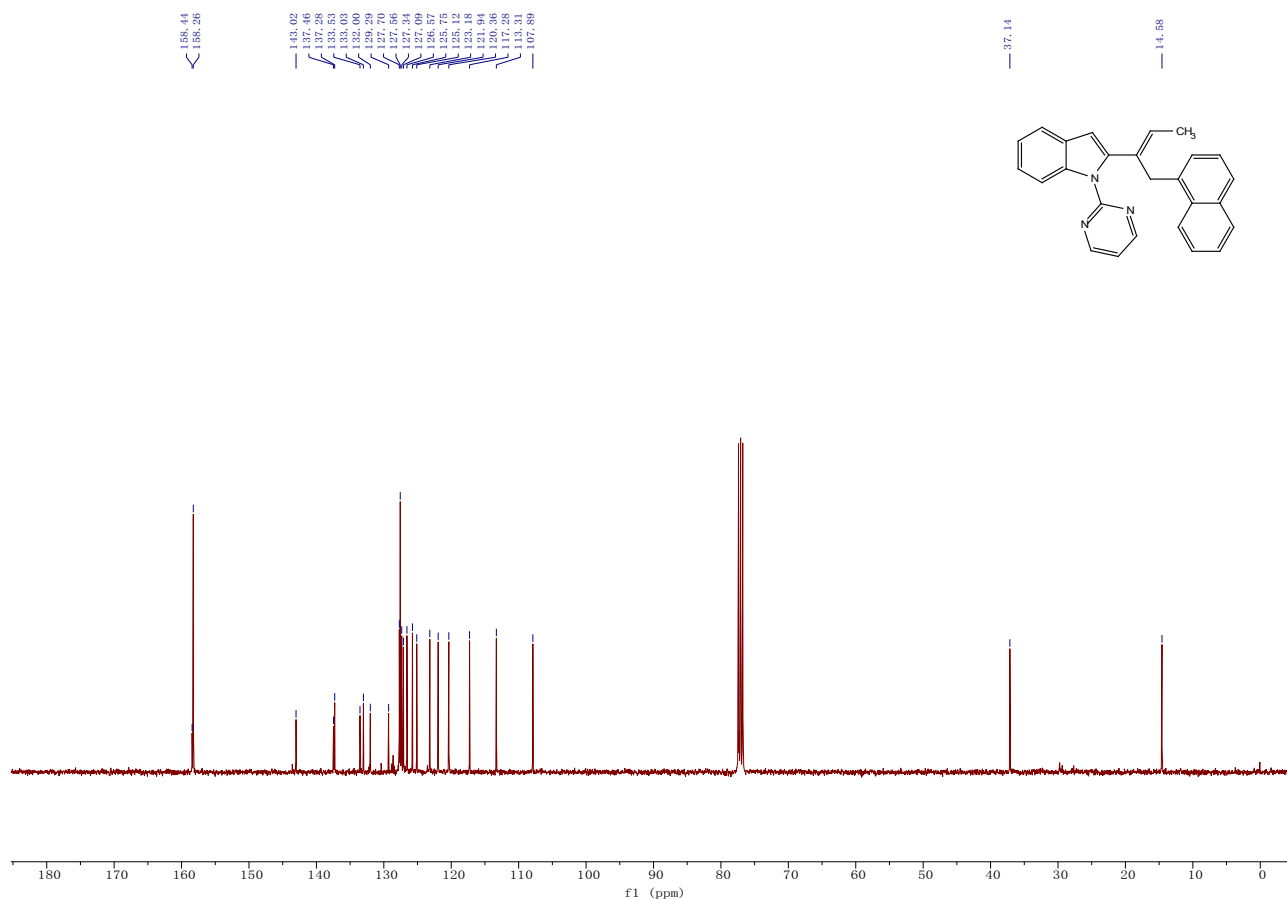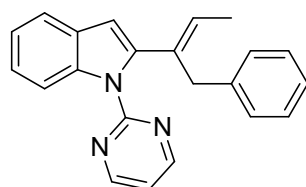

**Compound 3ac:** yellow oil (28.0 mg, 86%). <sup>1</sup>H NMR (400 MHz, Chloroform-*d*) δ 1.80 (d, *J* = 7.0 Hz, 3H), 3.57 (s, 2H), 5.87 (q, *J* = 7.0 Hz, 1H), 6.44 (s, 1H), 6.74 – 6.90 (m, 3H), 7.14 – 7.24 (m, 3H), 7.52 (d, *J* = 7.3 Hz, 1H), 8.16 (d, *J* = 8.3 Hz, 1H), 8.79 (d, *J* = 4.8 Hz, 2H). <sup>13</sup>C NMR (100 MHz, Chloroform-*d*) δ 14.4, 36.4, 108.0, 108.9, 109.6, 113.4, 117.4, 120.4, 122.1, 123.3, 123.4, 127.2, 129.1, 131.6, 132.6, 135.8, 137.5, 141.9, 142.3, 143.7, 158.27, 158.34. IR (neat) ν 3039, 2917, 2846, 1561, 1507, 1451, 1420, 1380, 1348, 1320, 1225, 1180, 1120, 1038 cm<sup>-1</sup>. HRMS (ESI) Calcd. for C<sub>22</sub>H<sub>20</sub>N<sub>3</sub> requires (M<sup>+</sup>+H): 326.1652, Found: 326.1652.

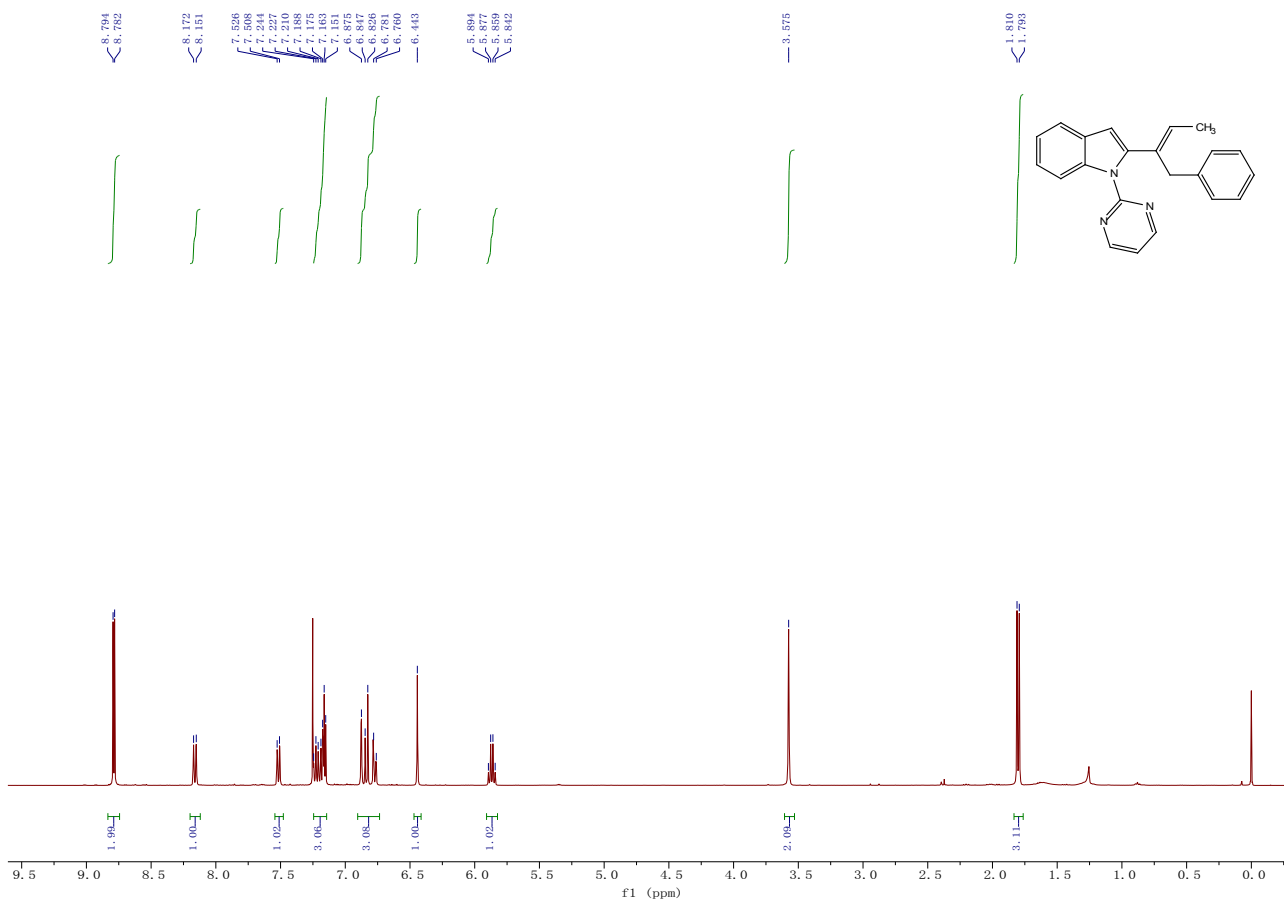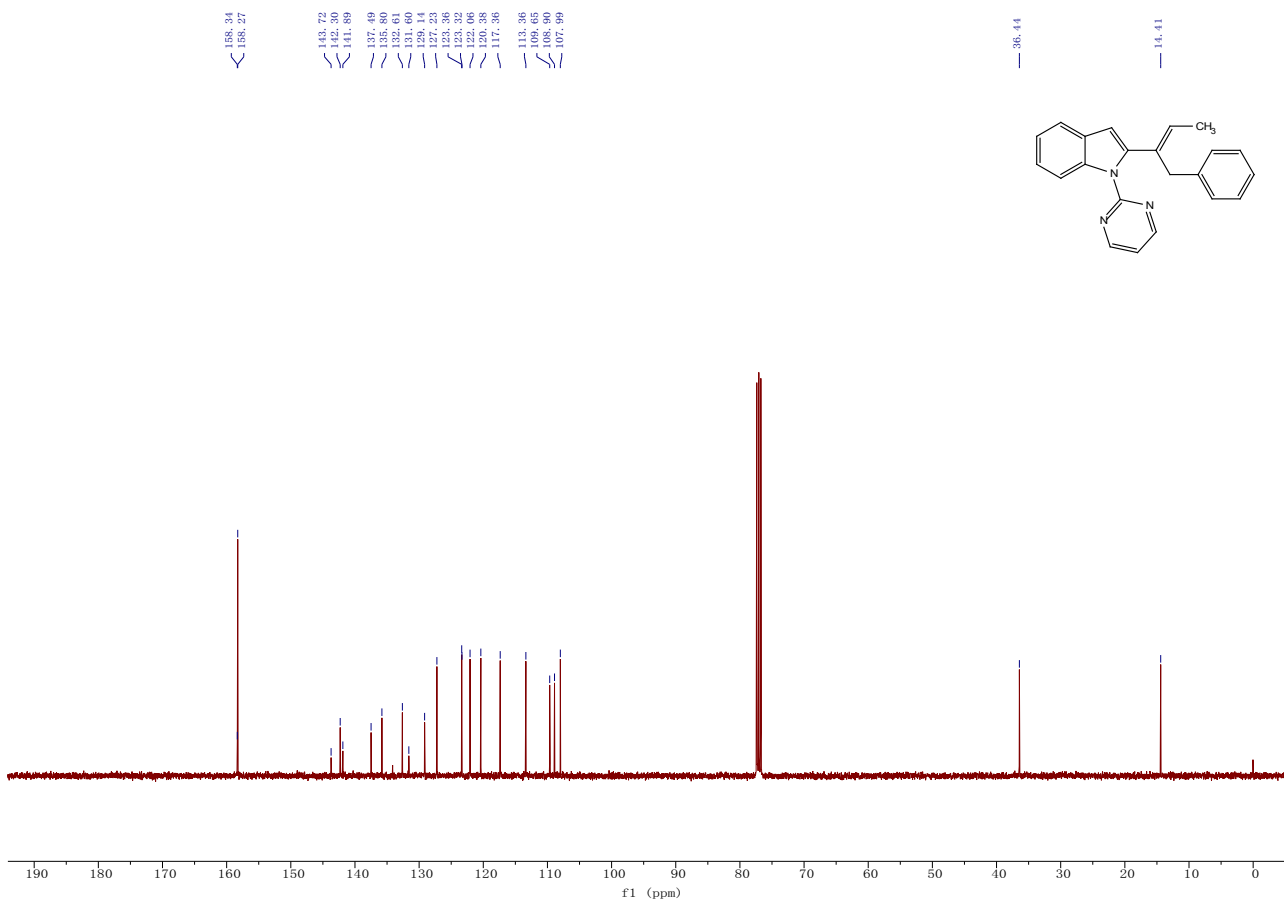

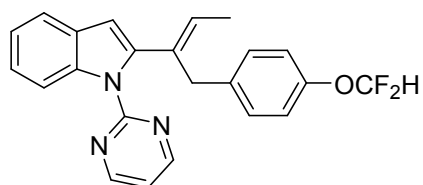

**Compound 3ad:** yellow oil (37.1 mg, 95%).  $^1\text{H}$  NMR (400 MHz, Chloroform-*d*)  $\delta$  1.82 (d,  $J = 6.9$  Hz, 3H), 3.55 (s, 2H), 5.91 (q,  $J = 7.0$  Hz, 1H), 6.427 (t,  $J = 74.4$  Hz, 1H), 6.438 (s, 1H), 6.93 (d,  $J = 8.6$  Hz, 2H), 7.07 (d,  $J = 8.6$  Hz, 2H), 7.13 – 7.25 (m, 3H), 7.26 (s, 1H), 7.52 (d,  $J = 7.4$  Hz, 1H), 8.18 (d,  $J = 8.2$  Hz, 1H), 8.79 (d,  $J = 4.7$  Hz, 2H).  $^{13}\text{C}$  NMR (100 MHz, Chloroform-*d*)  $\delta$  14.4, 36.1, 108.0, 113.4, 116.1 (t,  $J = 257$  Hz), 117.3, 119.3, 120.3, 122.0, 123.3, 126.8, 129.2, 129.7, 133.0, 136.9, 137.4, 142.6, 149.3, 158.27, 158.34.  $^{19}\text{F}$  NMR (376 MHz, Chloroform-*d*)  $\delta$  -80.4, -80.2. IR (neat)  $\nu$  3039, 2912, 2846, 1561, 1507, 1452, 1425, 1384, 1352, 1307, 1255, 1182, 1120, 1038  $\text{cm}^{-1}$ . HRMS (ESI) Calcd. for  $\text{C}_{23}\text{H}_{20}\text{F}_2\text{N}_3\text{O}$  requires ( $\text{M}^+ + \text{H}$ ): 392.1569, Found: 392.1575.

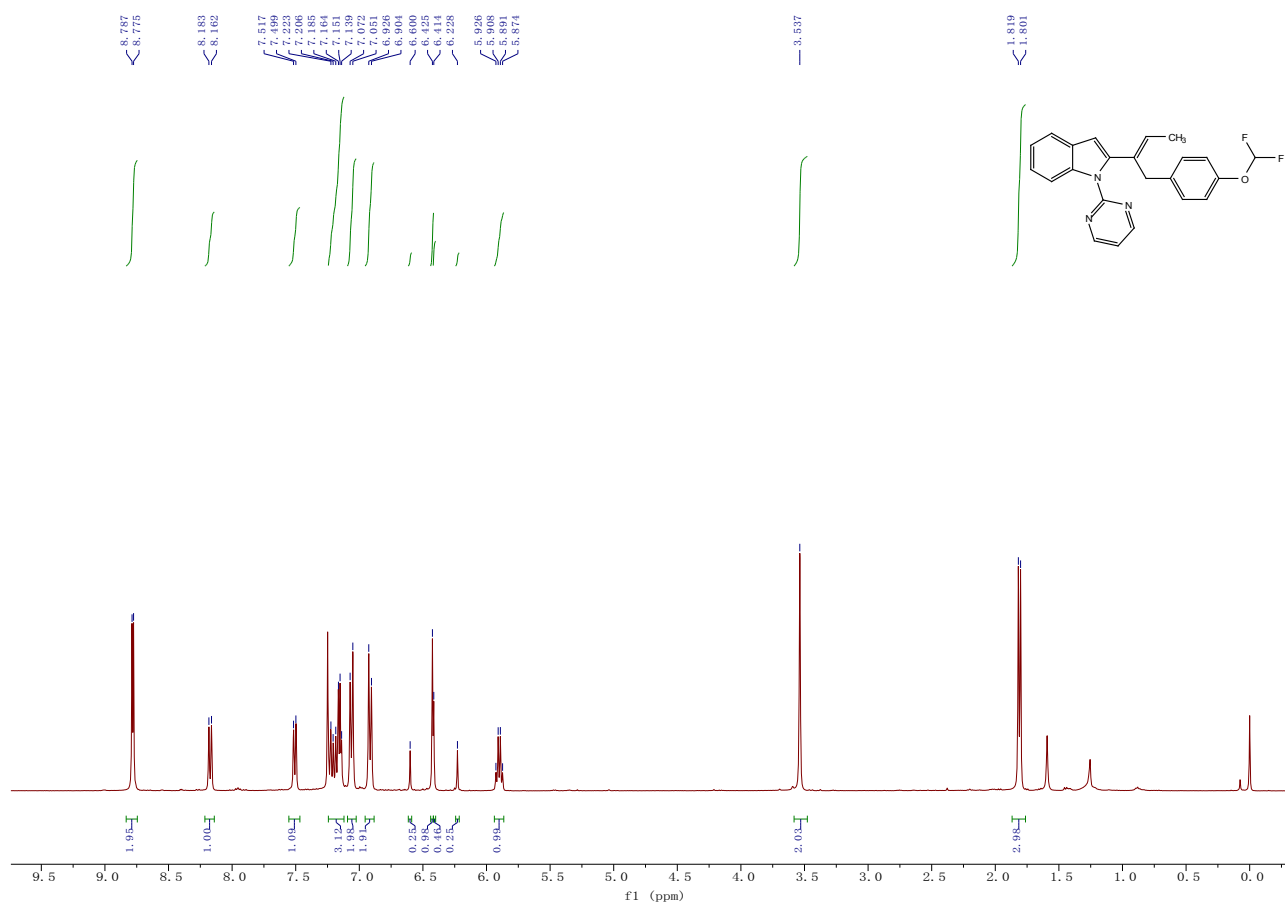

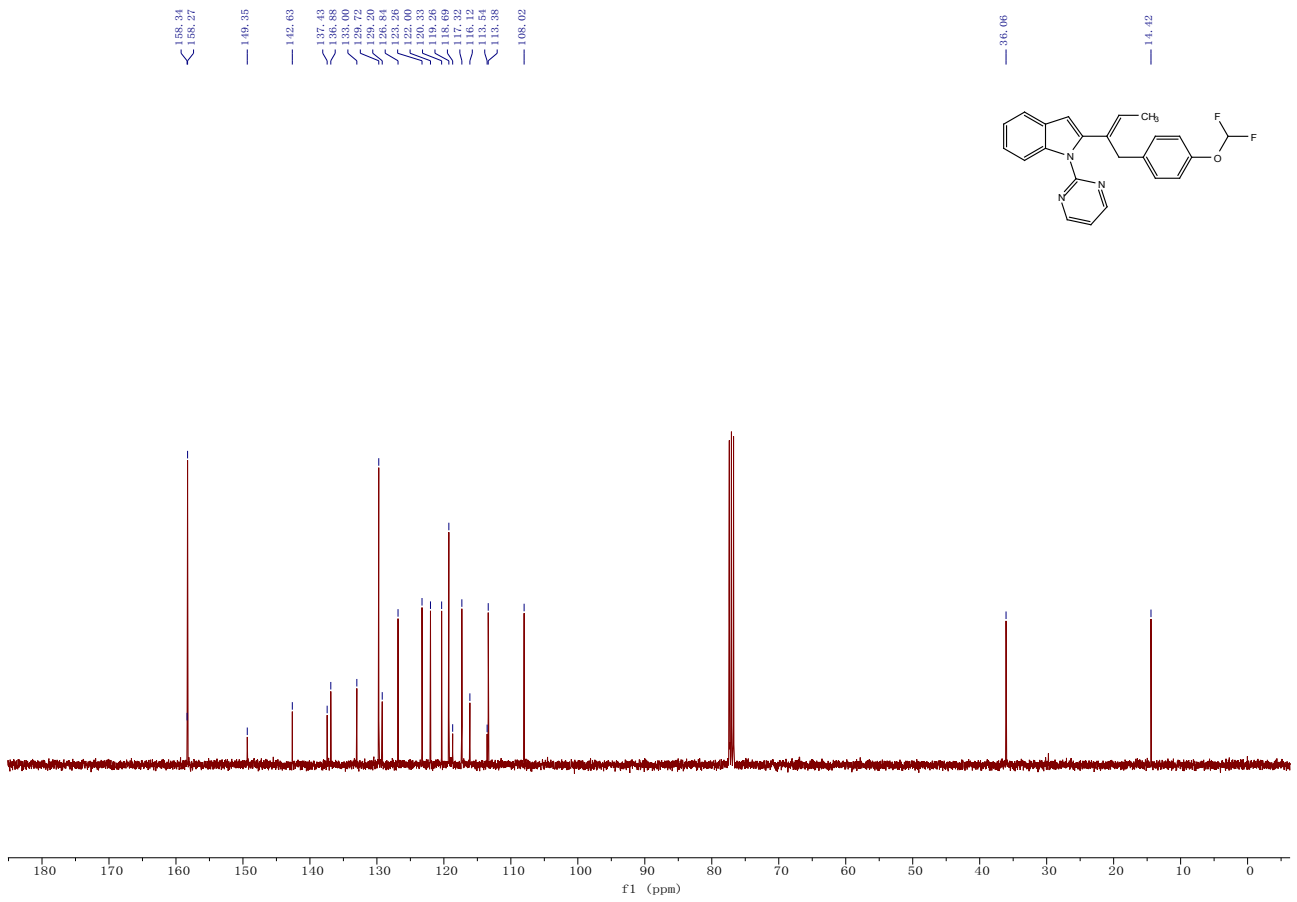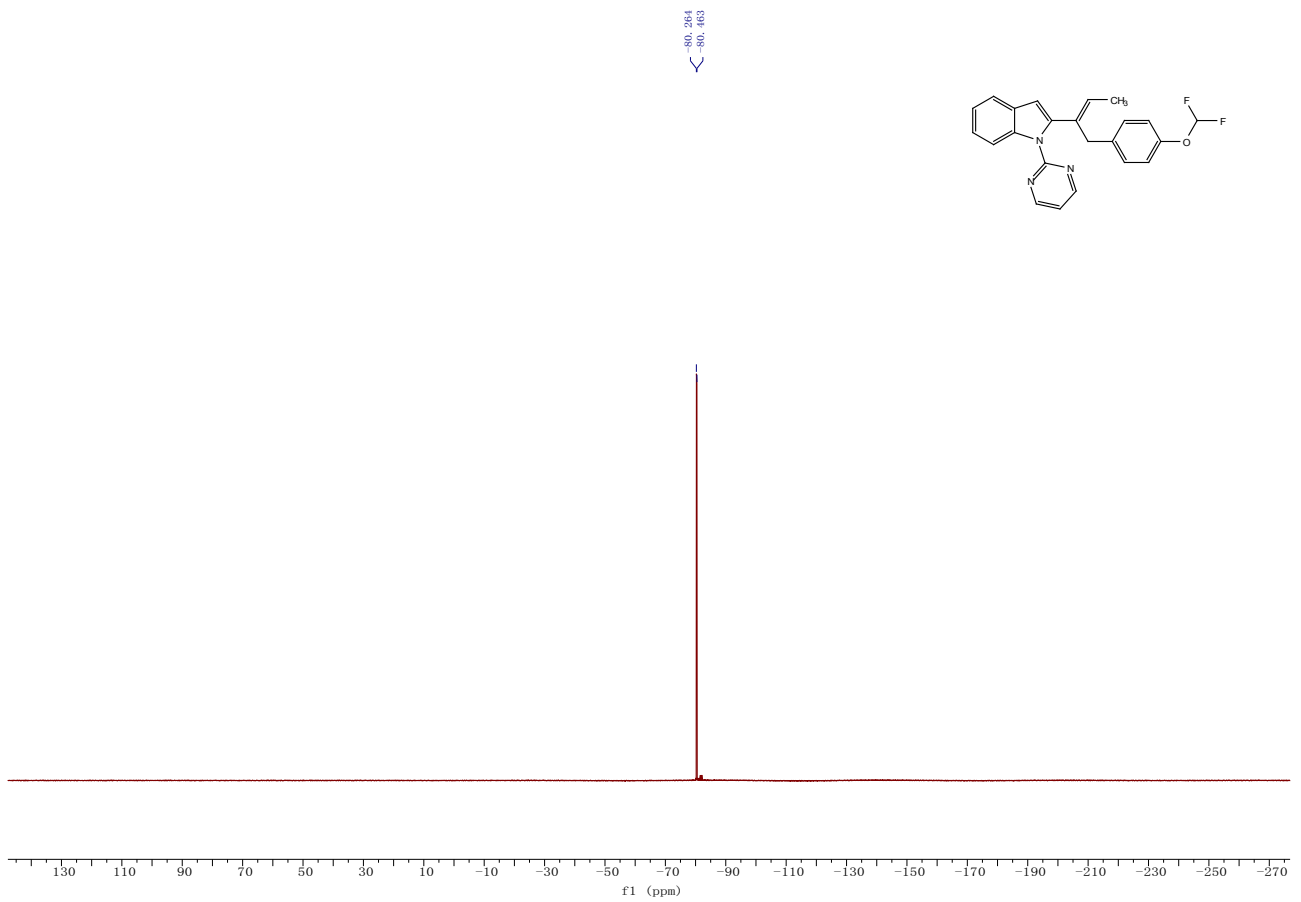

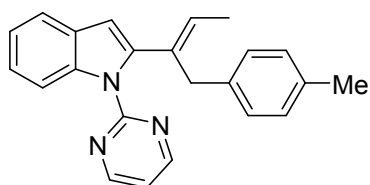

**Compound 3ae:** yellow oil (26.4 mg, 78%).  $^1\text{H}$  NMR (400 MHz, Chloroform-*d*)  $\delta$  1.81 (d,  $J = 7.0$  Hz, 3H), 2.24 (s, 3H), 3.50 (s, 2H), 5.89 (q,  $J = 7.0$  Hz, 1H), 6.43 (s, 1H), 6.97 (s, 4H), 7.10 – 7.22 (m, 3H), 7.49 (d,  $J = 7.6$  Hz, 1H), 8.17 (d,  $J = 8.3$  Hz, 1H), 8.78 (d,  $J = 4.8$  Hz, 2H).  $^{13}\text{C}$  NMR (100 MHz, Chloroform-*d*)  $\delta$  14.5, 21.0, 36.4, 107.9, 113.3, 117.3, 120.3, 121.9, 123.1, 126.5, 128.3, 128.9, 129.3, 133.5, 135.2, 136.5, 137.4, 143.1, 158.3, 158.4. IR (neat)  $\nu$  3034, 2923, 2845, 1561, 1508, 1450, 1421, 1375, 1345, 1318, 1213, 1178, 1120, 1038  $\text{cm}^{-1}$ . HRMS (ESI) Calcd. for  $\text{C}_{23}\text{H}_{22}\text{N}_3$  requires ( $\text{M}^++\text{H}$ ): 340.1808, Found: 340.1808.

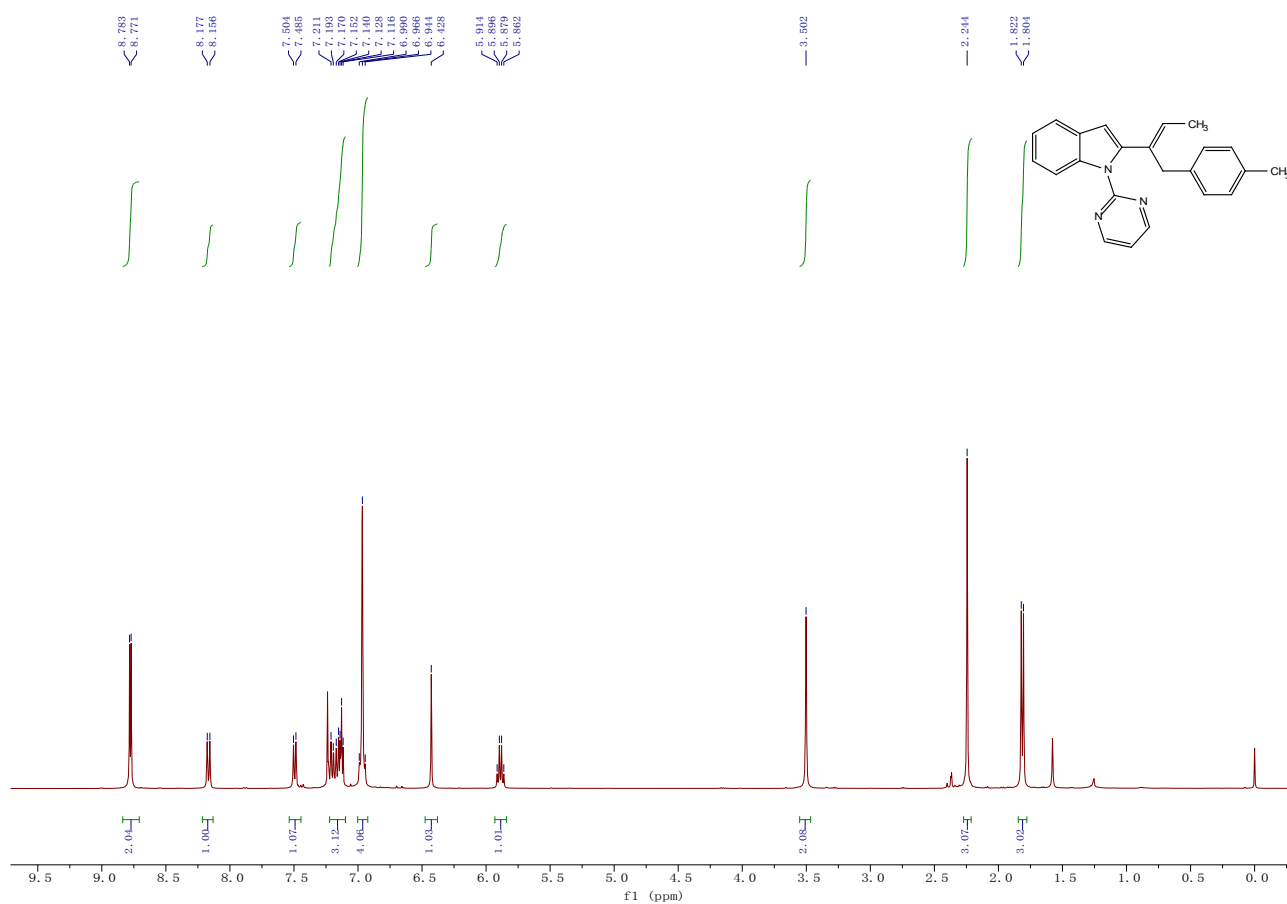

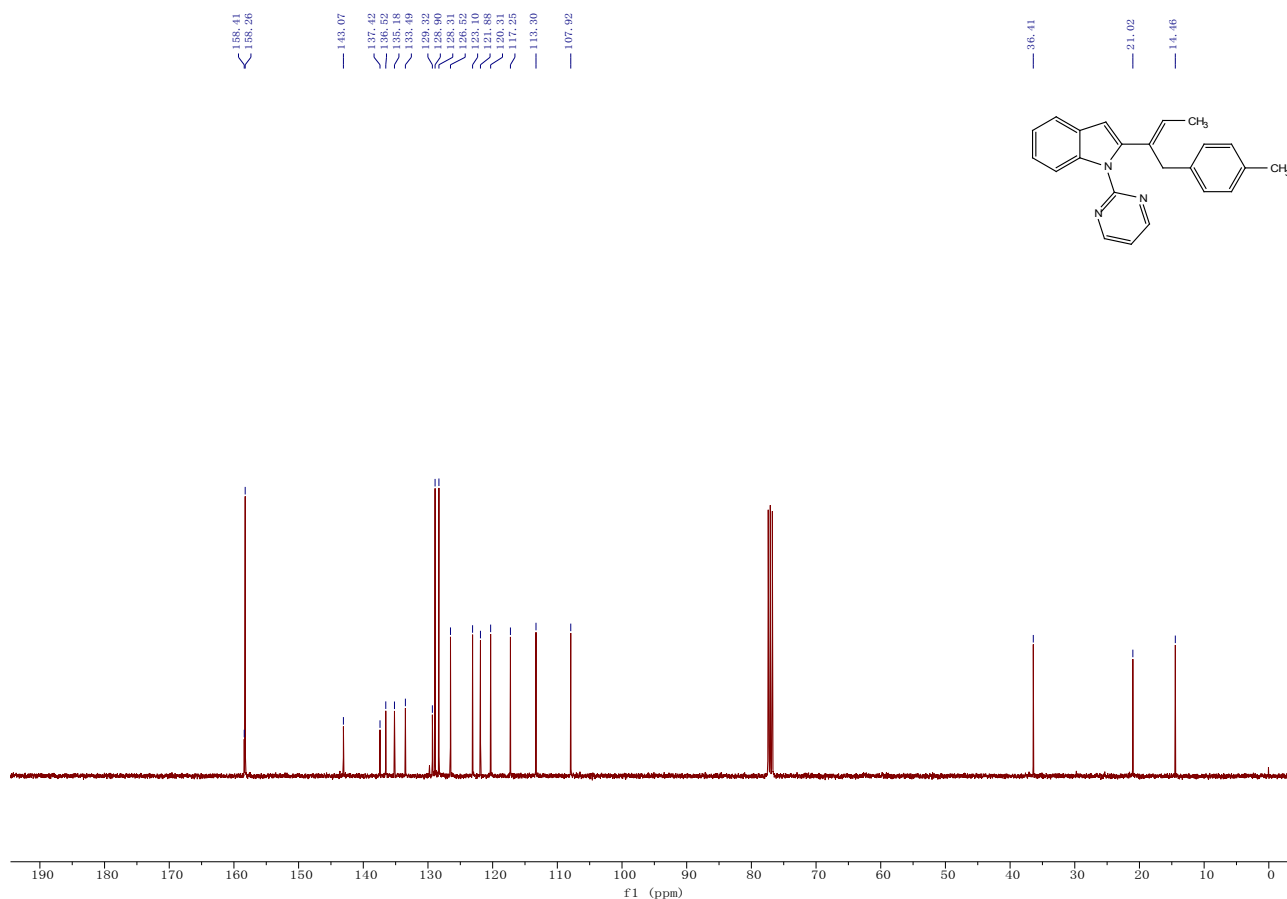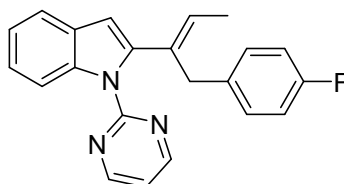

**Compound 3af:** yellow oil (27.1 mg, 79%).  $^1\text{H}$  NMR (400 MHz, Chloroform-*d*)  $\delta$  1.81 (d,  $J = 7.0$  Hz, 3H), 3.52 (s, 2H), 5.88 (q,  $J = 6.9$  Hz, 1H), 6.41 (s, 1H), 6.85 (dd,  $J = 8.7$  Hz, 2H), 6.99 – 7.05 (m, 2H), 7.12 – 7.25 (m, 3H), 7.50 (d,  $J = 7.2$  Hz, 1H), 8.17 (d,  $J = 8.3$  Hz, 1H), 8.78 (d,  $J = 4.8$  Hz, 2H).  $^{13}\text{C}$  NMR (100 MHz, Chloroform-*d*)  $\delta$  14.4, 36.0, 108.0, 113.4, 114.8, 115.0, 117.3, 120.3, 122.0, 123.2, 126.6, 129.2, 129.8 (d,  $J = 7.7$  Hz), 133.3, 135.3 (d,  $J = 4.0$  Hz), 137.4, 142.7, 158.26, 158.34, 161.2 (d,  $J = 243.0$  Hz).  $^{19}\text{F}$  NMR (376 MHz, Chloroform-*d*)  $\delta$  -117.8. IR (neat)  $\nu$  2920, 2846, 1580, 1560, 1495, 1449, 1379, 1348, 1317, 1225, 1156, 1064, 1007  $\text{cm}^{-1}$ . HRMS (ESI) Calcd. for  $\text{C}_{22}\text{H}_{19}\text{FN}_3$  requires ( $\text{M}^+\text{+H}$ ): 344.1558, Found: 344.1562.

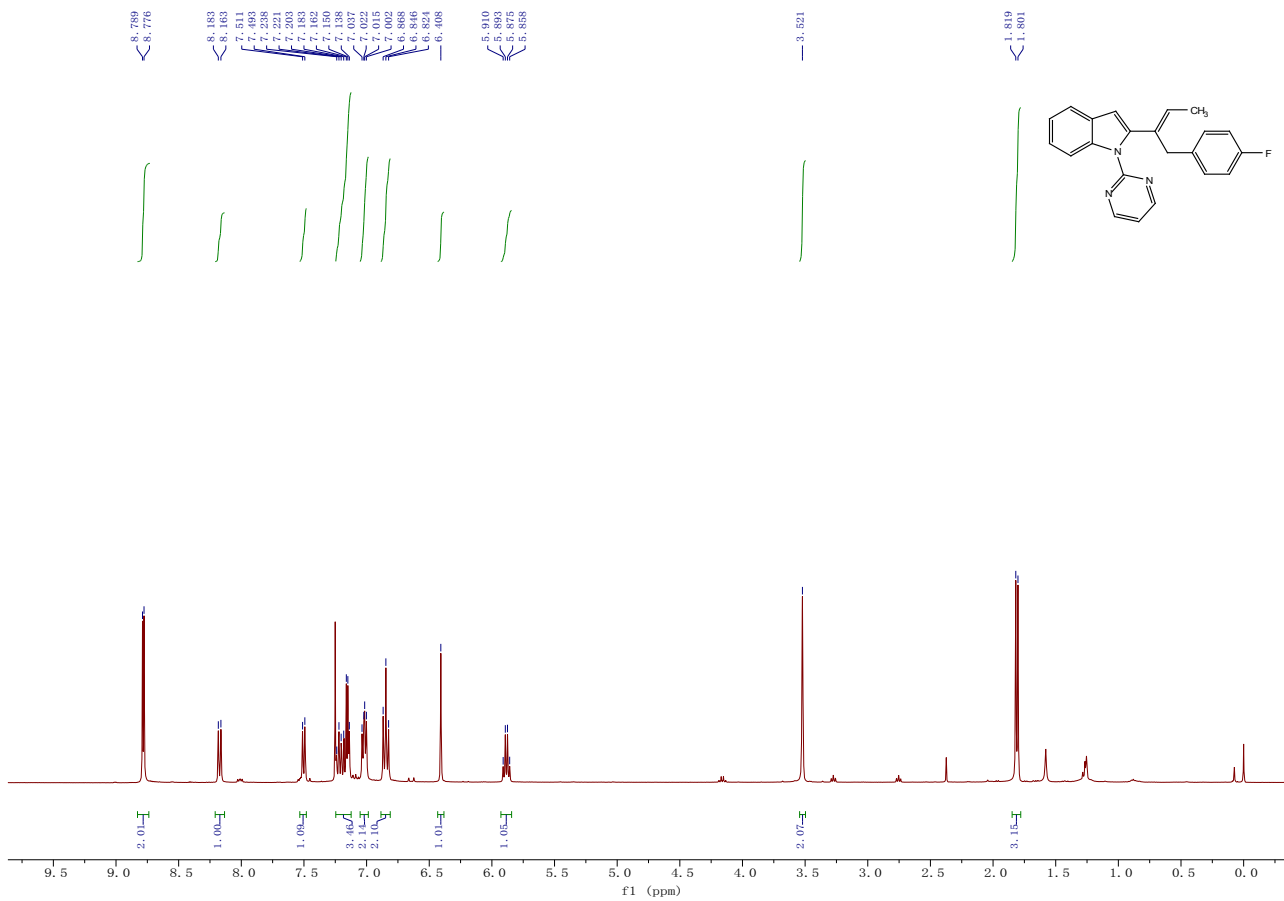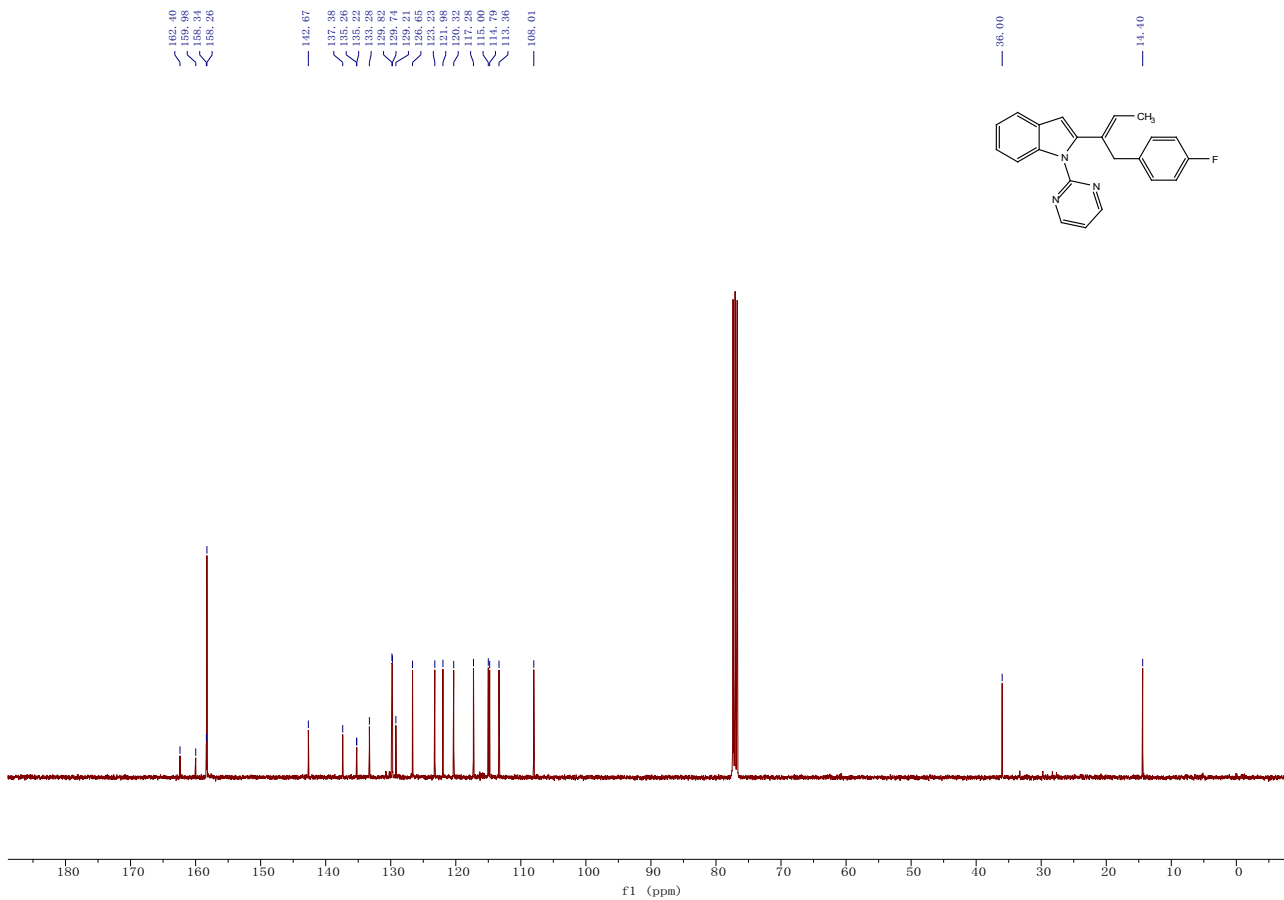



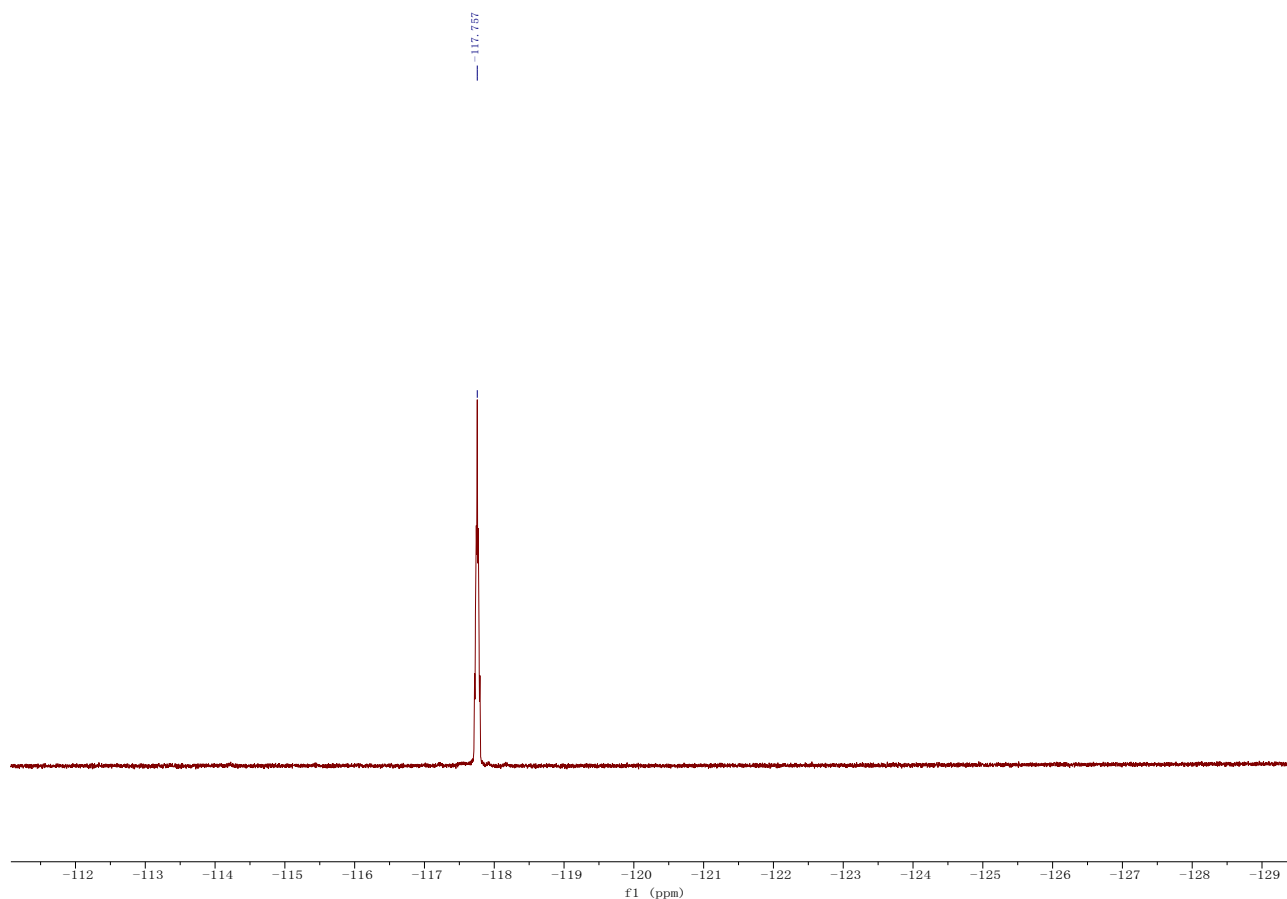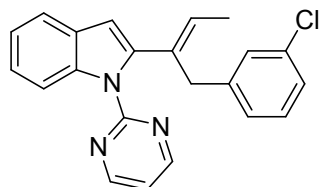

**Compound 3ah:** yellow oil (30.9 mg, 86%).  $^1\text{H}$  NMR (400 MHz, Chloroform-*d*)  $\delta$  1.81 (d,  $J = 6.9$  Hz, 3H), 3.60 (s, 2H), 5.89 (q,  $J = 6.9$  Hz, 1H), 6.48 (s, 1H), 6.96 – 7.01 (m, 1H), 7.08 – 7.12 (m, 2H), 7.14 – 7.26 (m, 4H), 7.53 (d,  $J = 7.5$  Hz, 1H), 8.17 (d,  $J = 8.2$  Hz, 1H), 8.80 (d,  $J = 4.7$  Hz, 2H).  $^{13}\text{C}$  NMR (100 MHz, Chloroform-*d*)  $\delta$  14.5, 36.5, 107.9, 113.3, 117.4, 120.4, 122.0, 123.3, 126.0, 126.7, 127.3, 128.6, 129.2, 129.4, 132.3, 133.9, 137.5, 141.7, 142.5, 158.3, 158.4. IR (neat)  $\nu$  3035, 2918, 2849, 1570, 1559, 1507, 1486, 1420, 1380, 1348, 1320, 1256, 1184, 1058, 1007  $\text{cm}^{-1}$ . HRMS (ESI) Calcd. for  $\text{C}_{22}\text{H}_{19}\text{ClN}_3$  requires ( $\text{M}^+ + \text{H}$ ): 360.1262, Found: 360.1279.

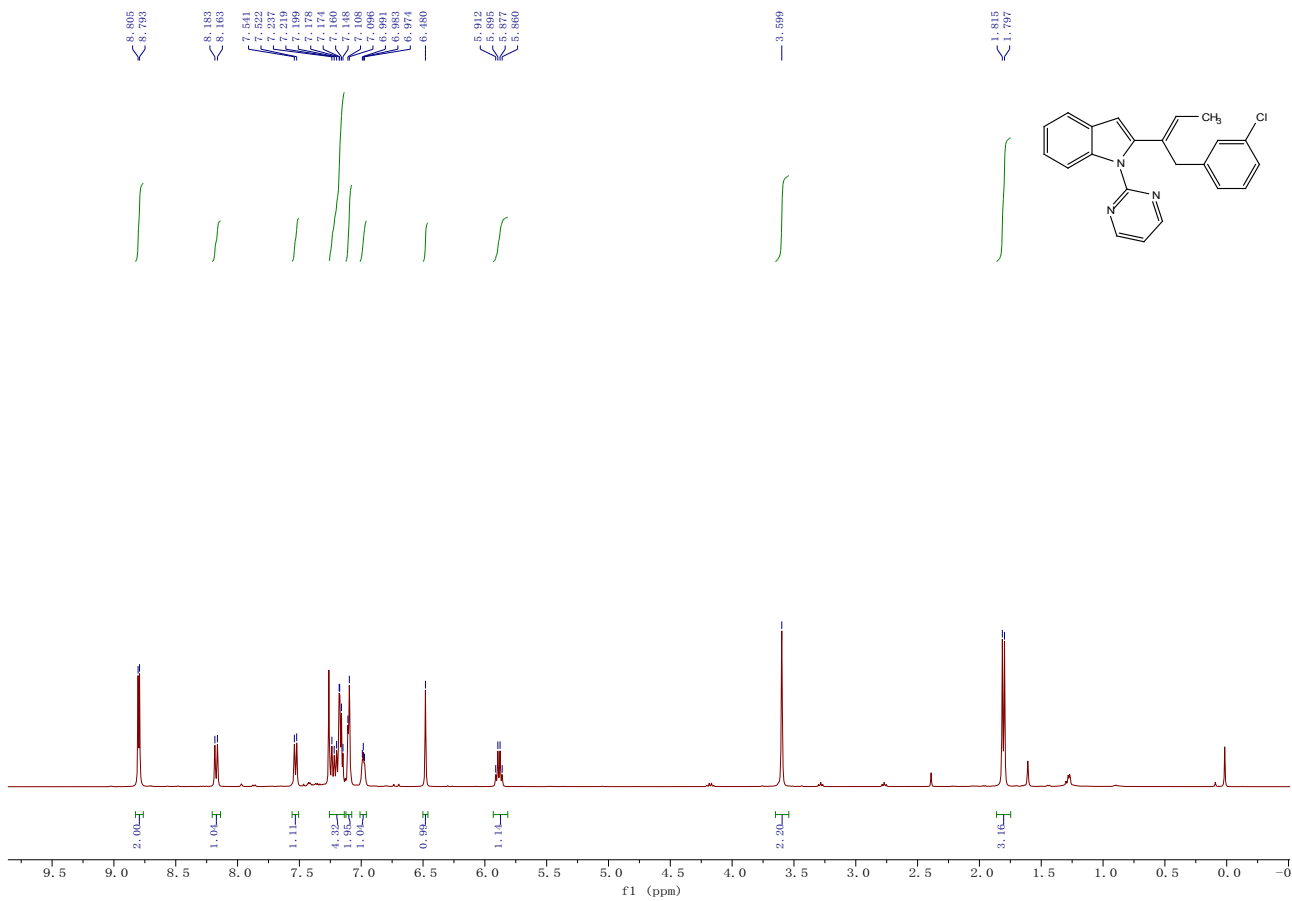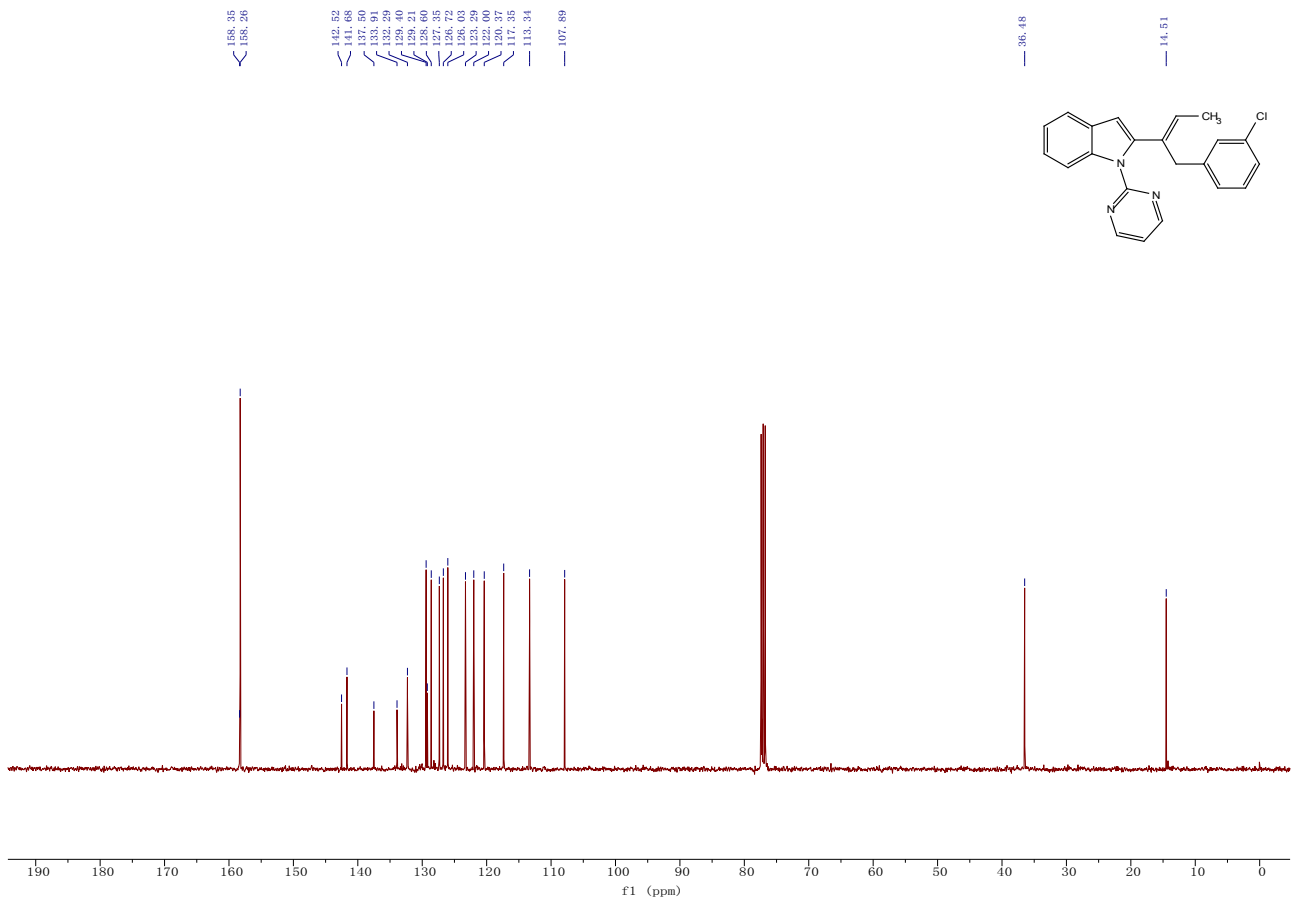

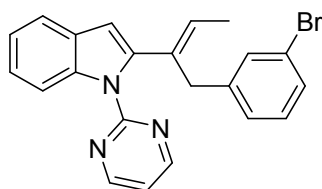

**Compound 3ai:** yellow oil (38.4 mg, 95%).  $^1\text{H}$  NMR (400 MHz, Chloroform-*d*)  $\delta$  1.79 (d,  $J = 7.0$  Hz, 3H), 3.59 (s, 2H), 5.87 (q,  $J = 6.9$  Hz, 1H), 6.46 (s, 1H), 6.94 – 7.01 (m, 1H), 7.05 – 7.10 (m, 2H), 7.11 – 7.24 (m, 4H), 7.51 (d,  $J = 7.3$  Hz, 1H), 8.16 (d,  $J = 8.3$  Hz, 1H), 8.78 (d,  $J = 4.8$  Hz, 2H).  $^{13}\text{C}$  NMR (100 MHz, Chloroform-*d*)  $\delta$  14.5, 36.5, 107.9, 113.3, 117.4, 120.4, 122.0, 123.3, 126.0, 126.7, 127.3, 128.6, 129.2, 129.4, 132.3, 133.9, 137.5, 141.7, 142.5, 158.26, 158.35. IR (neat)  $\nu$  3039, 2919, 2846, 1559, 1507, 1451, 1422, 1380, 1348, 1321, 1226, 1146, 1127, 1052  $\text{cm}^{-1}$ . HRMS (ESI) Calcd. for  $\text{C}_{22}\text{H}_{19}\text{BrN}_3$  requires ( $\text{M}^+ + \text{H}$ ): 404.0757, Found: 404.0757.

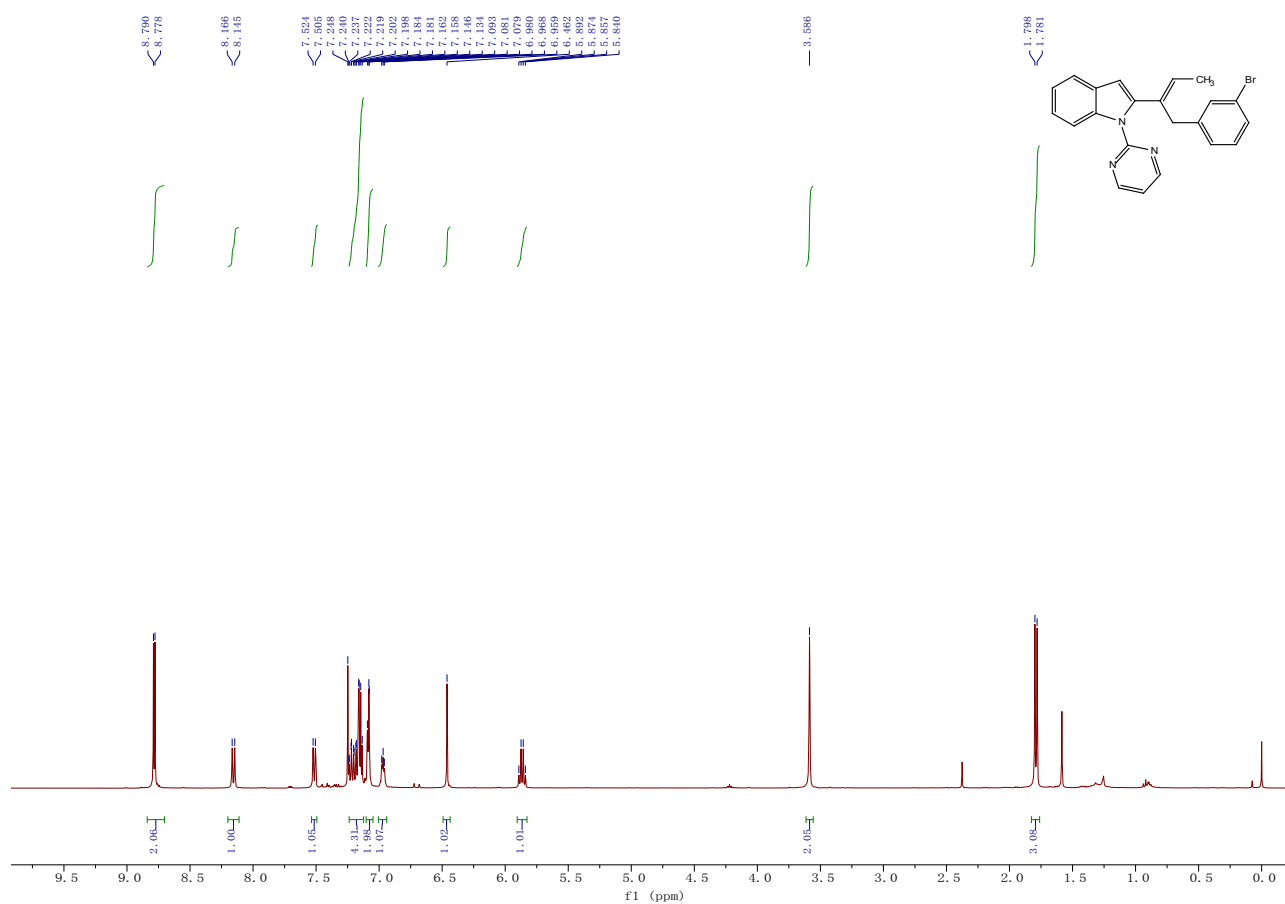

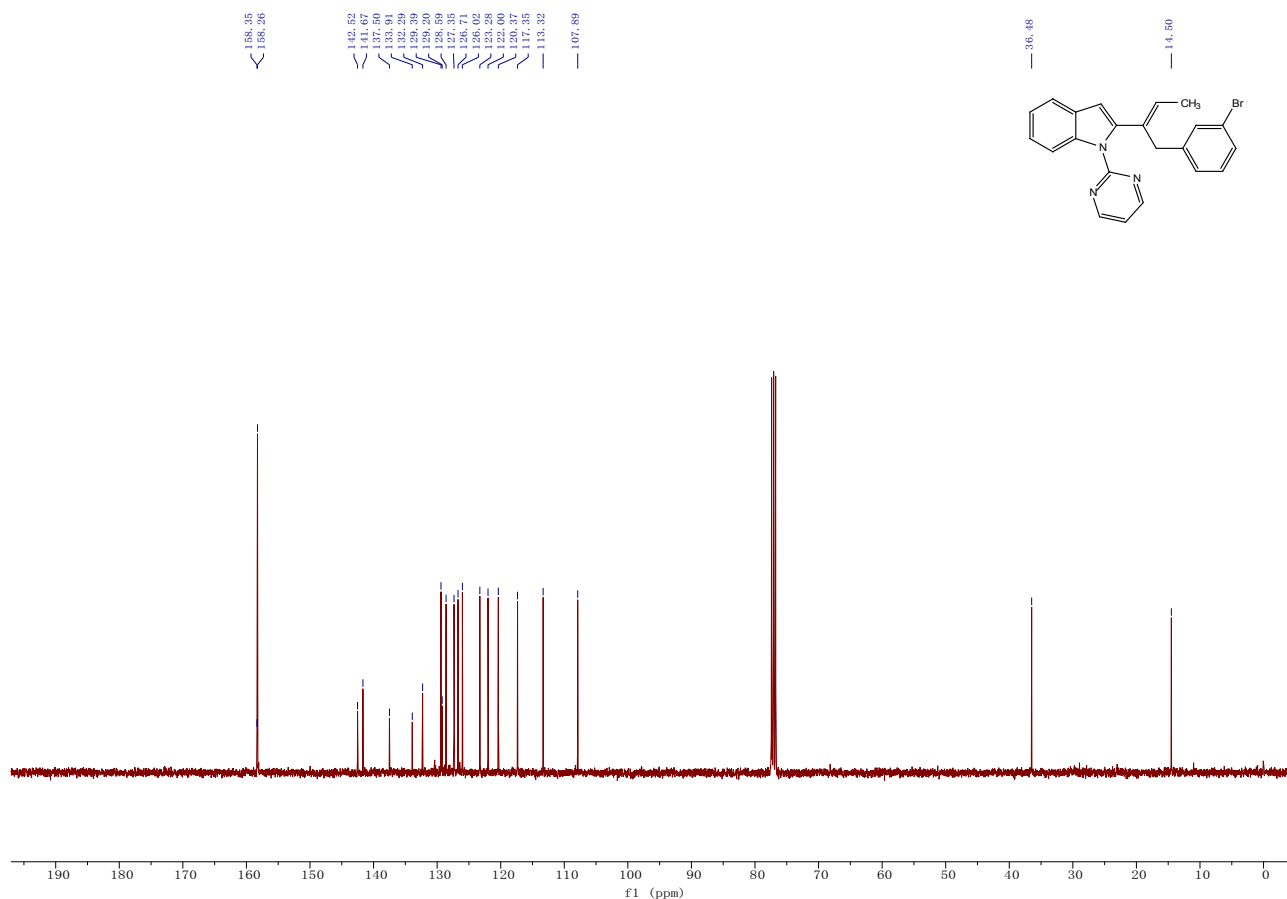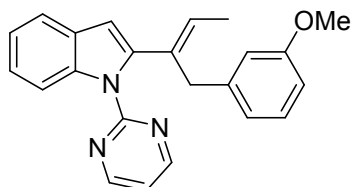

**Compound 3aj:** yellow oil (25.6 mg, 72%). <sup>1</sup>H NMR (400 MHz, Chloroform-*d*) δ 1.81 (d, *J* = 6.9 Hz, 3H), 3.54 (s, 2H), 3.67 (s, 3H), 5.90 (q, *J* = 6.8 Hz, 1H), 6.46 (s, 1H), 6.61 – 6.71 (m, 3H), 7.05 – 7.24 (m, 4H), 7.50 (d, *J* = 7.7 Hz, 1H), 8.17 (d, *J* = 8.2 Hz, 1H), 8.78 (d, *J* = 4.7 Hz, 2H). <sup>13</sup>C NMR (100 MHz, Chloroform-*d*) δ 14.5, 36.8, 55.1, 108.0, 111.2, 113.3, 114.1, 117.3, 120.3, 120.9, 121.9, 123.2, 126.8, 129.07, 129.09, 129.3, 133.0, 137.4, 141.2, 142.9, 158.1, 158.3, 158.4, 159.5. IR (neat) ν 3039, 2917, 2850, 1559, 1507, 1451, 1422, 1385, 1345, 1323, 1228, 1164, 1120, 1055 cm<sup>-1</sup>. HRMS (ESI) Calcd. for C<sub>23</sub>H<sub>22</sub>N<sub>3</sub>O requires (M<sup>+</sup>+H): 356.1757, Found: 356.1766.

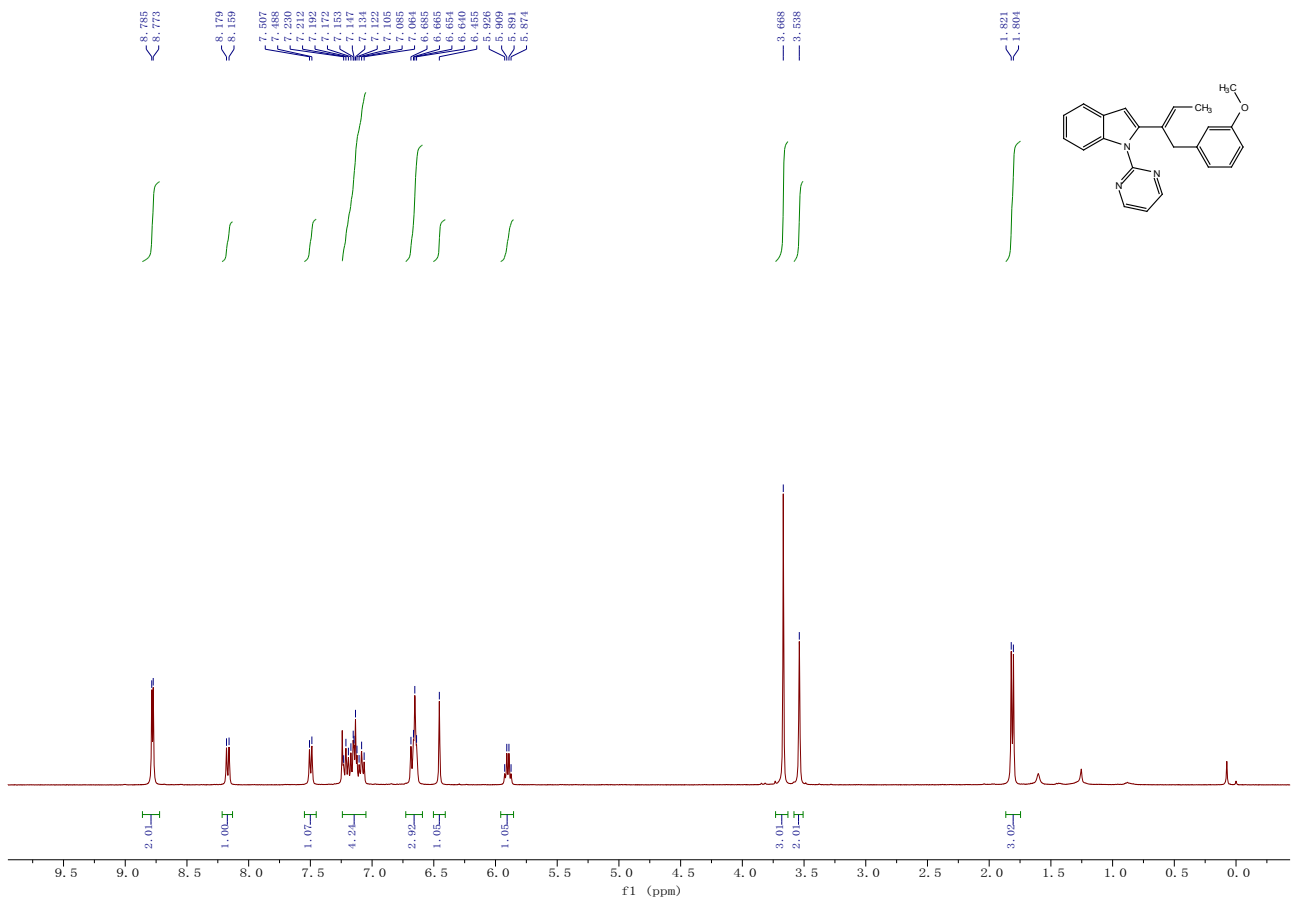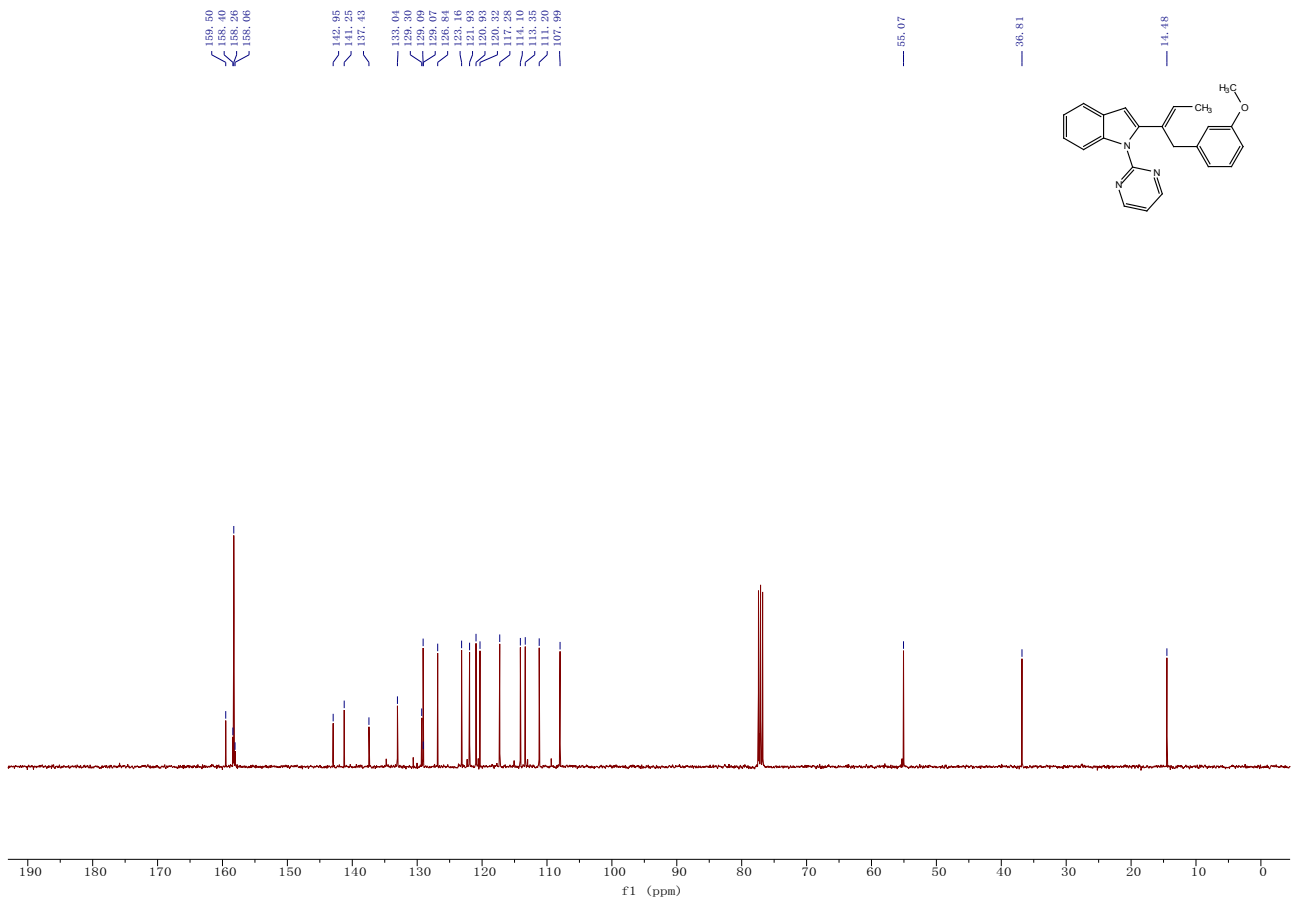

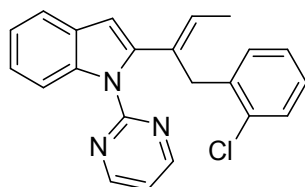

**Compound 3ak:** yellow oil (24.5 mg, 68%).  $^1\text{H}$  NMR (400 MHz, Chloroform-*d*)  $\delta$  1.84 (d,  $J = 7.0$  Hz, 3H), 3.57 (s, 2H), 5.98 (q,  $J = 7.0$  Hz, 1H), 6.60 (s, 1H), 7.13 (dd,  $J = 8.1, 3.6$  Hz, 3H), 7.15 – 7.21 (m, 1H), 7.28 (dd,  $J = 7.3$  Hz, 1H), 7.35 – 7.43 (m, 4H), 7.52 (d,  $J = 7.6$  Hz, 2H), 8.03 (d,  $J = 8.2$  Hz, 1H), 8.79 (d,  $J = 4.8$  Hz, 2H).  $^{13}\text{C}$  NMR (100 MHz, Chloroform-*d*)  $\delta$  14.5, 33.9, 107.9, 113.3, 117.3, 120.3, 121.9, 123.2, 126.6, 127.2, 128.0, 129.1, 129.8, 131.5, 134.0, 136.8, 137.5, 139.5, 142.6, 158.2, 158.3. IR (neat)  $\nu$  3021, 2922, 2850, 1570, 1559, 1486, 1440, 1336, 1310, 1256, 1225, 1184, 1058  $\text{cm}^{-1}$ . HRMS (ESI) Calcd. for  $\text{C}_{22}\text{H}_{19}\text{ClN}_3$  requires ( $\text{M}^+\text{H}$ ): 360.1262, Found: 360.1267.

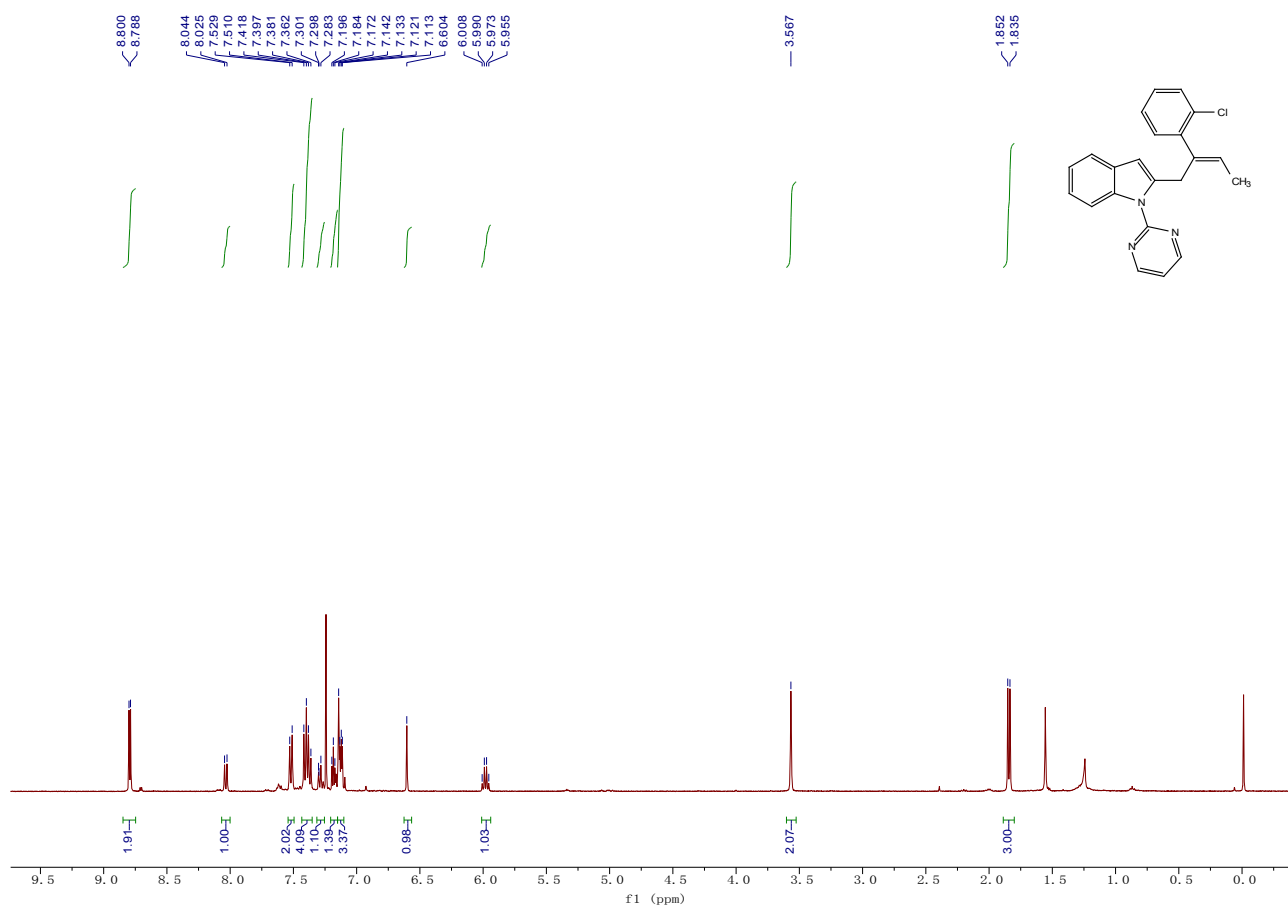

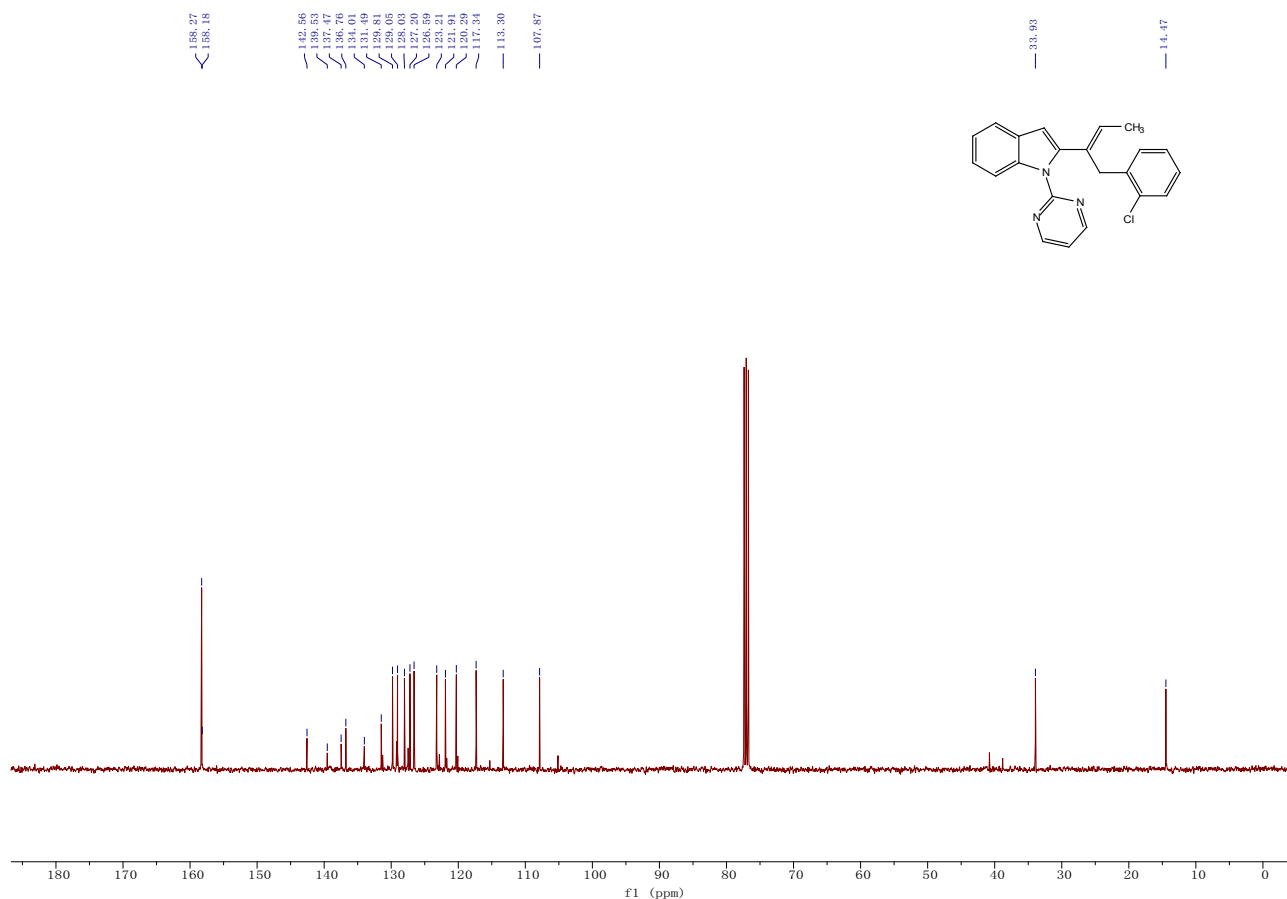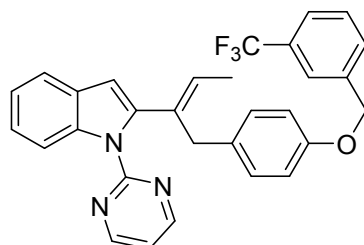

**Compound 3al:** yellow oil (37.5 mg, 75%).  $^1\text{H}$  NMR (400 MHz, Chloroform-*d*)  $\delta$  1.79 (d,  $J$  = 6.9 Hz, 3H), 3.65 (s, 2H), 4.97 (s, 2H), 5.95 (q,  $J$  = 7.3 Hz, 1H), 6.42 (s, 1H), 6.73 (d,  $J$  = 8.6 Hz, 1H), 6.85 (dd,  $J$  = 7.4 Hz, 1H), 7.05 – 7.23 (m, 5H), 7.36 (d,  $J$  = 8.0 Hz, 2H), 7.48 (d,  $J$  = 7.4 Hz, 1H), 7.54 (d,  $J$  = 8.1 Hz, 2H), 8.14 (d,  $J$  = 8.2 Hz, 1H), 8.75 (d,  $J$  = 4.9 Hz, 2H).  $^{13}\text{C}$  NMR (100 MHz, Chloroform-*d*)  $\delta$  14.4, 30.3, 68.9, 107.8, 111.2, 113.3, 117.1, 120.2, 121.0, 121.8, 123.1, 124.2 (q,  $J$  = 270 Hz), 125.3 (q,  $J$  = 3.9 Hz), 126.97, 127.05, 127.2, 127.9, 129.2, 129.5, 129.7 (q,  $J$  = 32.0 Hz), 132.6, 137.3, 141.5, 143.0, 156.0, 158.1, 158.4.  $^{19}\text{F}$  NMR (376 MHz, Chloroform-*d*)  $\delta$  -62.5. IR (neat)  $\nu$  3035, 2914, 2849, 1561, 1557, 1507, 1447, 1423, 1355, 1321, 1253, 1182, 1129, 1038  $\text{cm}^{-1}$ . HRMS (ESI) Calcd. for  $\text{C}_{30}\text{H}_{25}\text{F}_3\text{N}_3\text{O}$  requires ( $\text{M}^+\text{+H}$ ): 500.1944, Found: 500.1946.

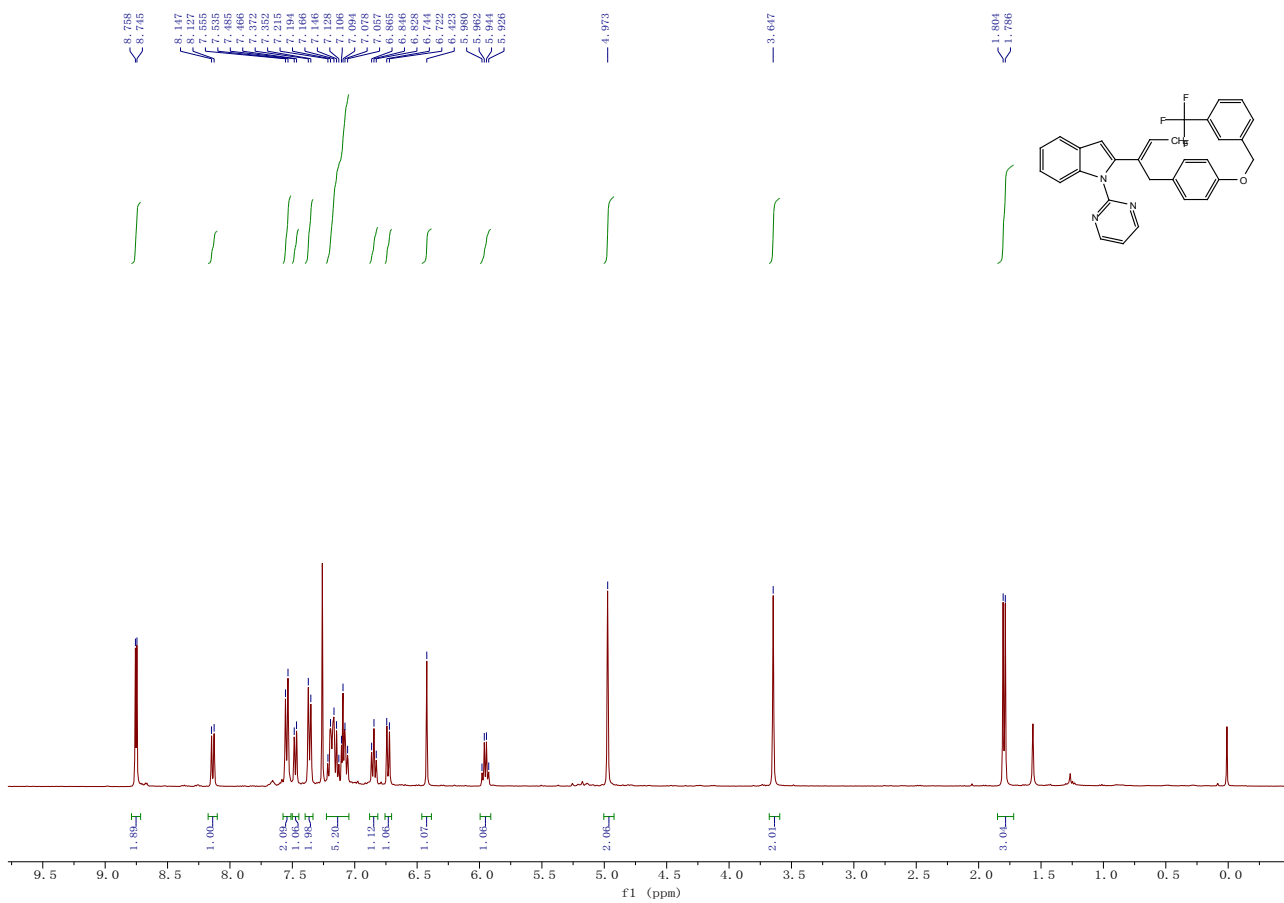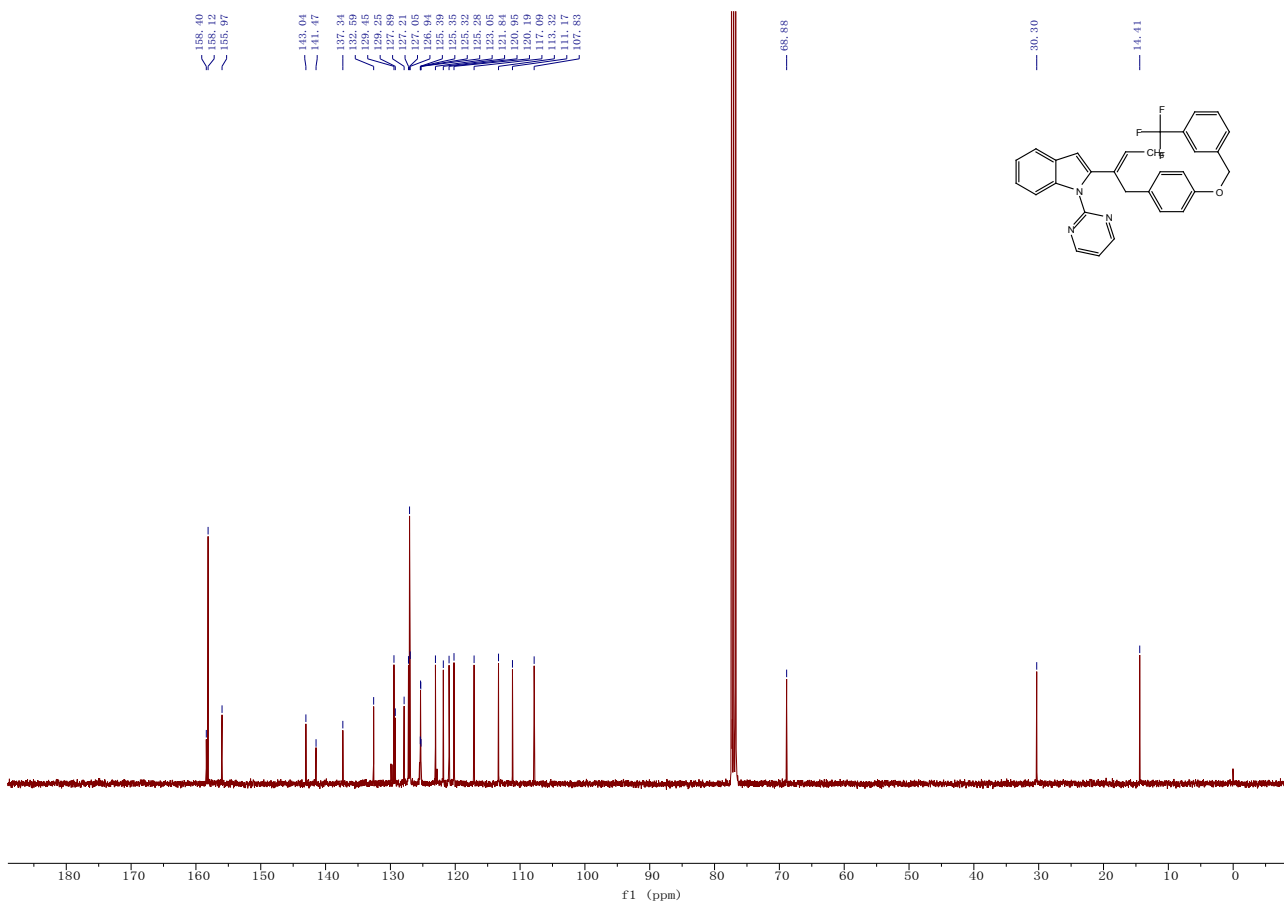



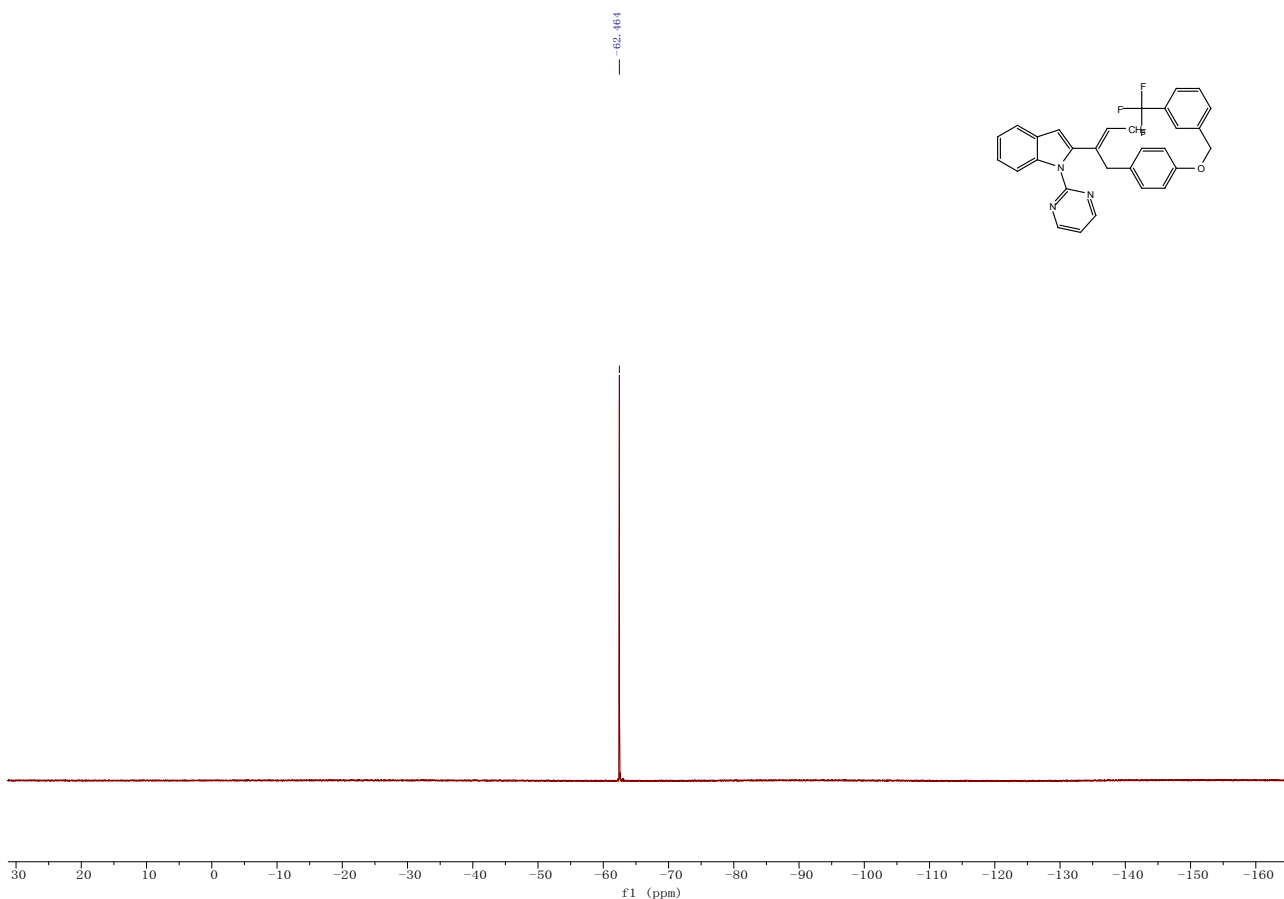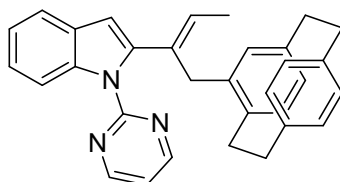

**Compound 3am** yellow oil (18.7 mg, 41%).  $^1\text{H}$  NMR (400 MHz, Chloroform-*d*)  $\delta$  1.74 (d,  $J = 7.0$  Hz, 3H), 2.56 – 2.65 (m, 1H), 2.66 – 2.75 (m, 1H), 2.79 – 2.88 (m, 1H), 2.91 – 3.04 (m, 6H), 3.31 (dd,  $J = 119.5, 15.7$  Hz, 3H), 5.90 (q,  $J = 6.8$  Hz, 1H), 6.05 – 6.11 (m, 2H), 6.28 (d,  $J = 7.7$  Hz, 1H), 6.33 – 6.40 (m, 3H), 6.43 – 6.47 (m, 2H), 7.12 – 7.23 (m, 4H), 7.47 – 7.53 (m, 1H), 8.12 – 8.17 (m, 1H), 8.86 (d,  $J = 4.8$  Hz, 2H).  $^{13}\text{C}$  NMR (100 MHz, Chloroform-*d*)  $\delta$  14.5, 33.4, 34.0, 34.9, 35.1, 35.3, 107.8, 113.2, 117.3, 120.3, 121.9, 123.1, 127.2, 128.0, 129.2, 130.2, 131.8, 132.6, 133.0, 133.2, 133.6, 134.4, 137.2, 137.9, 138.2, 139.1, 139.3, 139.4, 143.3, 158.3, 158.4. IR (neat)  $\nu$  3027, 2918, 2845, 1561, 1543, 1507, 1450, 1423, 1379, 1355, 1325, 1253, 1151, 1133, 1052  $\text{cm}^{-1}$ . HRMS (ESI) Calcd. for  $\text{C}_{32}\text{H}_{30}\text{N}_3$  requires ( $\text{M}^+ + \text{H}$ ): 456.2434, Found: 456.2438.

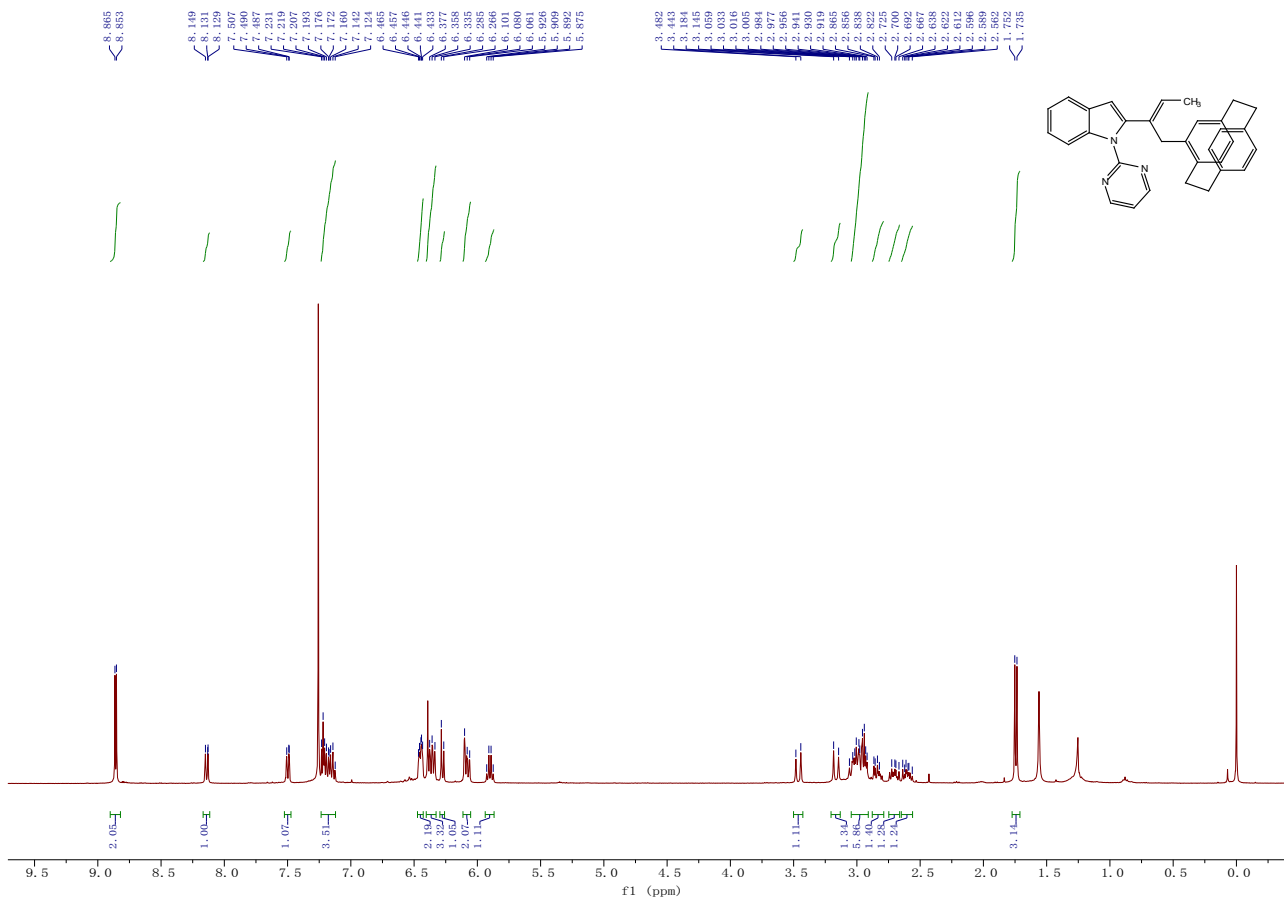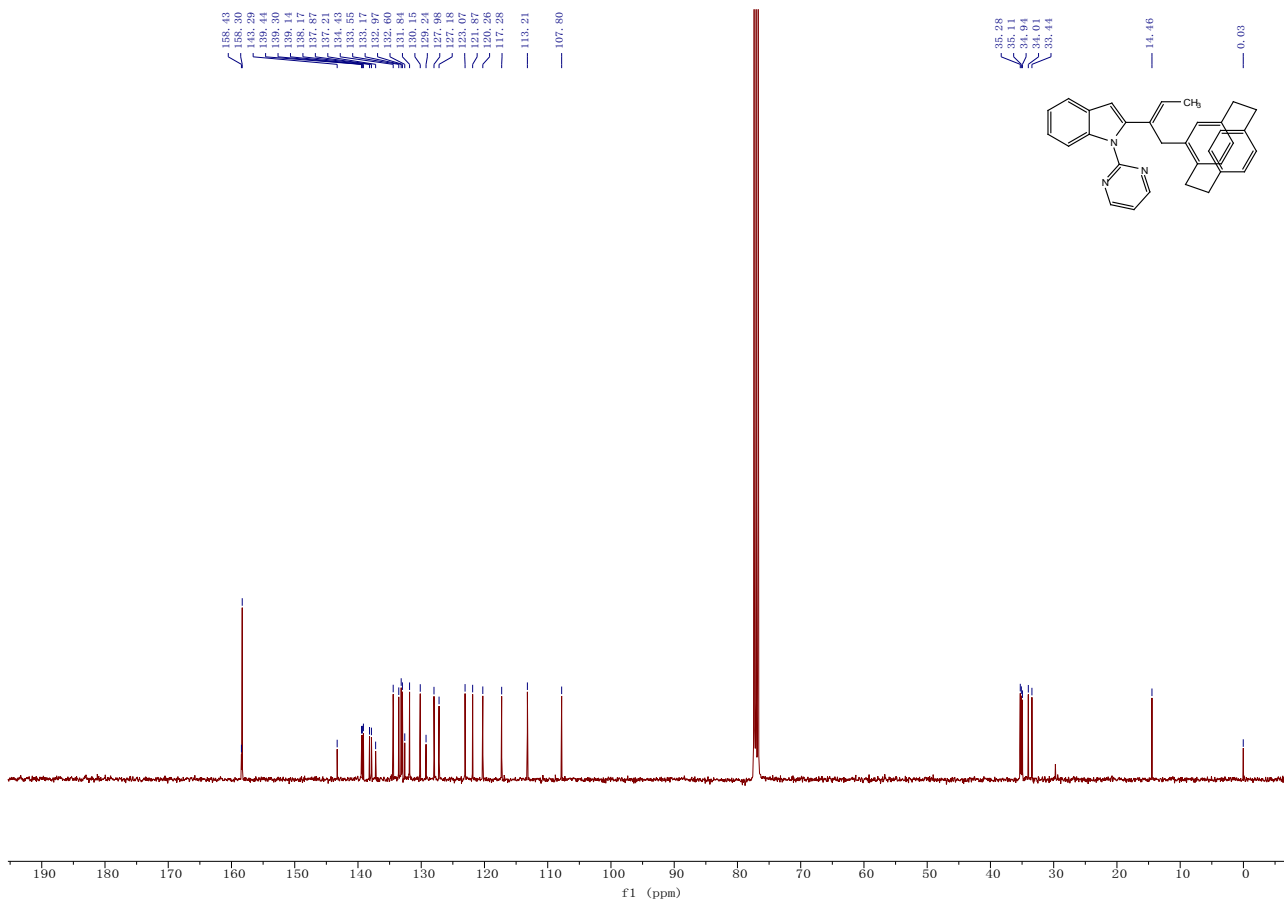

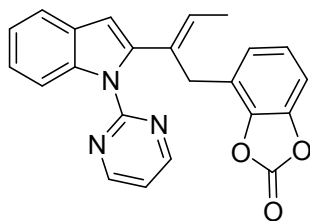

**Compound 3ao:** yellow oil (34.5 mg, 90%).  $^1\text{H}$  NMR (400 MHz, Chloroform-*d*)  $\delta$  1.84 (d,  $J = 6.9$  Hz, 3H), 3.58 (s, 2H), 5.30 (s, 1H), 5.93 (q,  $J = 6.9$  Hz, 1H), 6.45 (s, 1H), 7.06 – 7.28 (m, 6H), 7.52 (d,  $J = 7.6$  Hz, 1H), 8.19 (d,  $J = 8.1$  Hz, 1H), 8.80 (d,  $J = 4.8$  Hz, 2H).  $^{13}\text{C}$  NMR (100 MHz, Chloroform-*d*)  $\delta$  14.5, 36.9, 108.0, 113.3, 117.3, 120.3, 121.9, 123.2, 125.8, 126.7, 128.2, 128.5, 129.3, 133.3, 137.4, 139.7, 143.0, 158.3, 158.4. IR (neat)  $\nu$  3033, 2923, 2850, 1653, 1561, 1507, 1451, 1427, 1383, 1347, 1321, 1226, 1182, 1123, 1038  $\text{cm}^{-1}$ . HRMS (ESI) Calcd. for  $\text{C}_{23}\text{H}_{18}\text{N}_3\text{O}_3$  requires ( $\text{M}^++\text{H}$ ): 384.1343, Found: 384.1342.

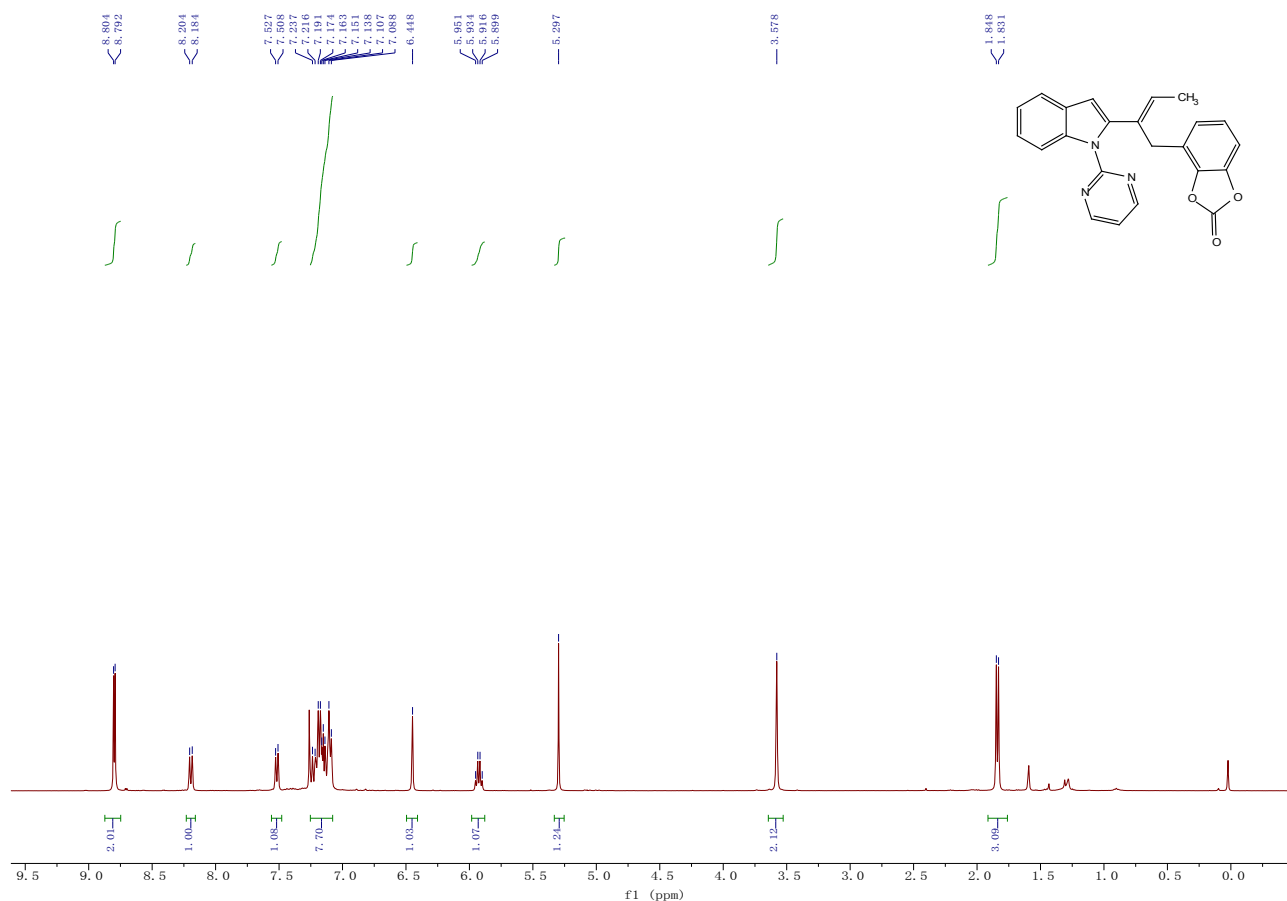

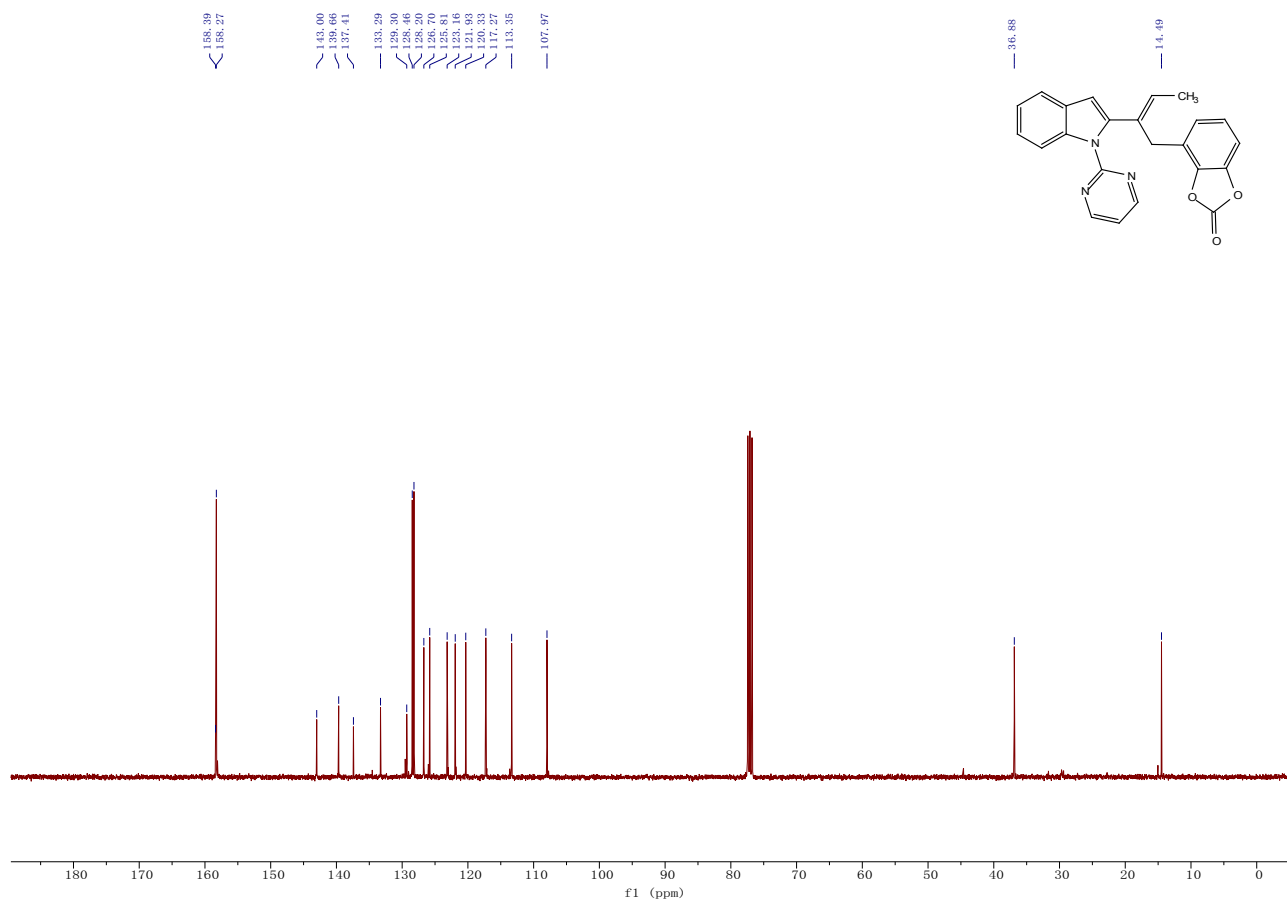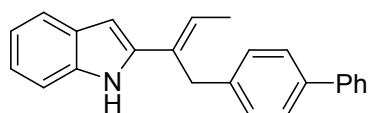

**Compound 5:** yellow oil (27.8 mg, 86%).  $^1\text{H}$  NMR (400 MHz, Chloroform-*d*)  $\delta$  1.84 (d,  $J = 6.9$  Hz, 3H), 3.58 (s, 2H), 5.30 (s, 1H), 5.93 (q,  $J = 6.9$  Hz, 1H), 6.45 (s, 1H), 7.06 – 7.28 (m, 5H), 7.52 (d,  $J = 7.6$  Hz, 1H), 8.19 (d,  $J = 8.1$  Hz, 1H), 8.80 (d,  $J = 4.8$  Hz, 2H).  $^{13}\text{C}$  NMR (100 MHz, Chloroform-*d*)  $\delta$  14.5, 36.9, 108.0, 113.3, 117.3, 120.3, 121.9, 123.2, 125.8, 126.7, 128.2, 128.5, 129.3, 133.3, 137.4, 139.7, 143.0, 158.3, 158.4. IR (neat)  $\nu$  3035, 2918, 2849, 1570, 1559, 1507, 1486, 1420, 1380, 1348, 1320, 1256, 1184, 1058, 1007  $\text{cm}^{-1}$ . HRMS (ESI) Calcd. for  $\text{C}_{18}\text{H}_{17}\text{N}$  requires ( $\text{M}^++\text{H}$ ): 247.1361, Found: 247.1361.

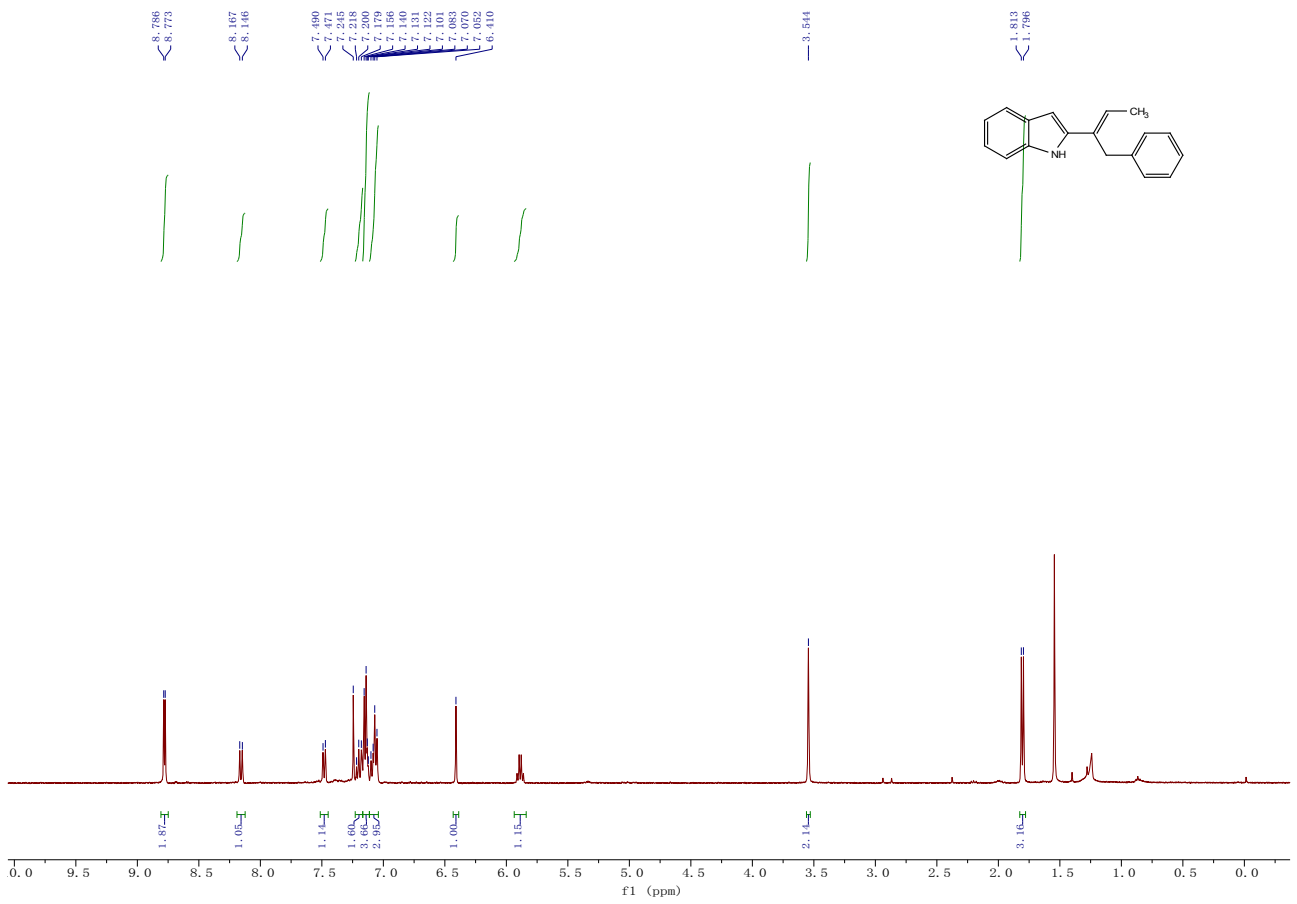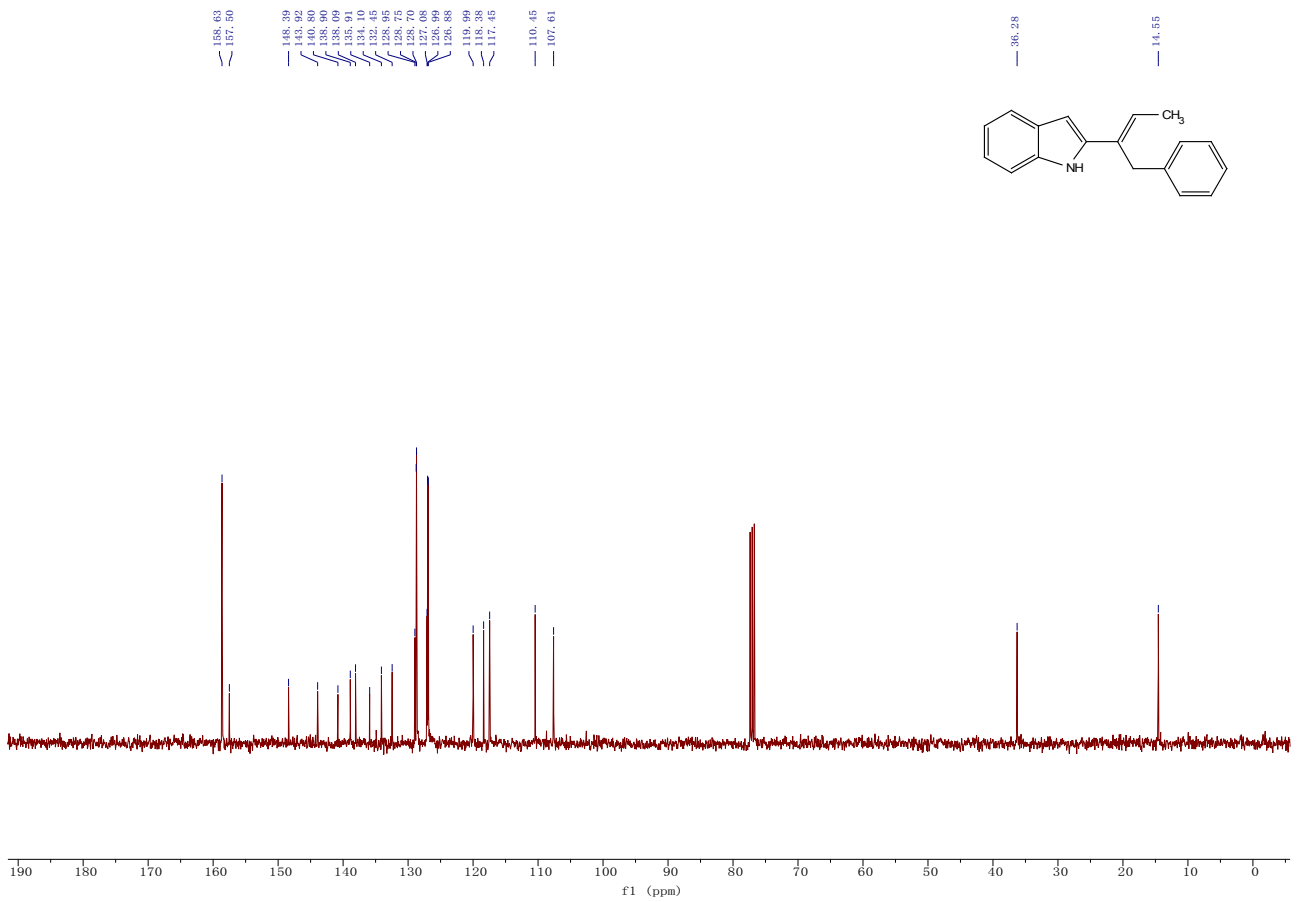

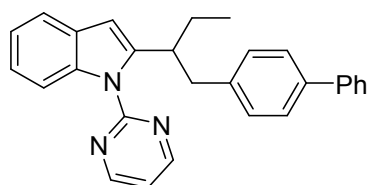

**Compound 6:** yellow oil (36.7 mg, 91%).  $^1\text{H}$  NMR (400 MHz, Chloroform-*d*)  $\delta$  0.88 (t,  $J = 7.3$  Hz, 3H), 1.64 – 1.79 (m, 2H), 2.83 (dd,  $J = 13.6, 8.0$  Hz, 1H), 3.16 (dd,  $J = 13.6, 6.0$  Hz, 1H), 4.07 – 4.18 (m, 1H), 6.55 (s, 1H), 7.09 – 7.16 (m, 3H), 7.16 – 7.25 (m, 3H), 7.26 – 7.35 (m, 1H), 7.36 – 7.45 (m, 4H), 7.50 – 7.60 (m, 3H), 8.09 (dd,  $J = 7.0, 2.3$  Hz, 1H), 8.78 (d,  $J = 4.8$  Hz, 2H).  $^{13}\text{C}$  NMR (100 MHz, Chloroform-*d*)  $\delta$  14.5, 36.9, 108.0, 113.3, 117.3, 120.3, 121.9, 123.2, 125.8, 126.7, 128.2, 128.5, 129.3, 133.3, 137.4, 139.7, 143.0, 158.3, 158.4. IR (neat)  $\nu$  3039, 2917, 2850, 1559, 1507, 1451, 1422, 1385, 1345, 1323, 1228, 1164, 1120, 1055  $\text{cm}^{-1}$ . HRMS (ESI) Calcd. for  $\text{C}_{28}\text{H}_{25}\text{N}_3$  requires ( $\text{M}^++\text{H}$ ): 403.2048, Found: 403.2049.

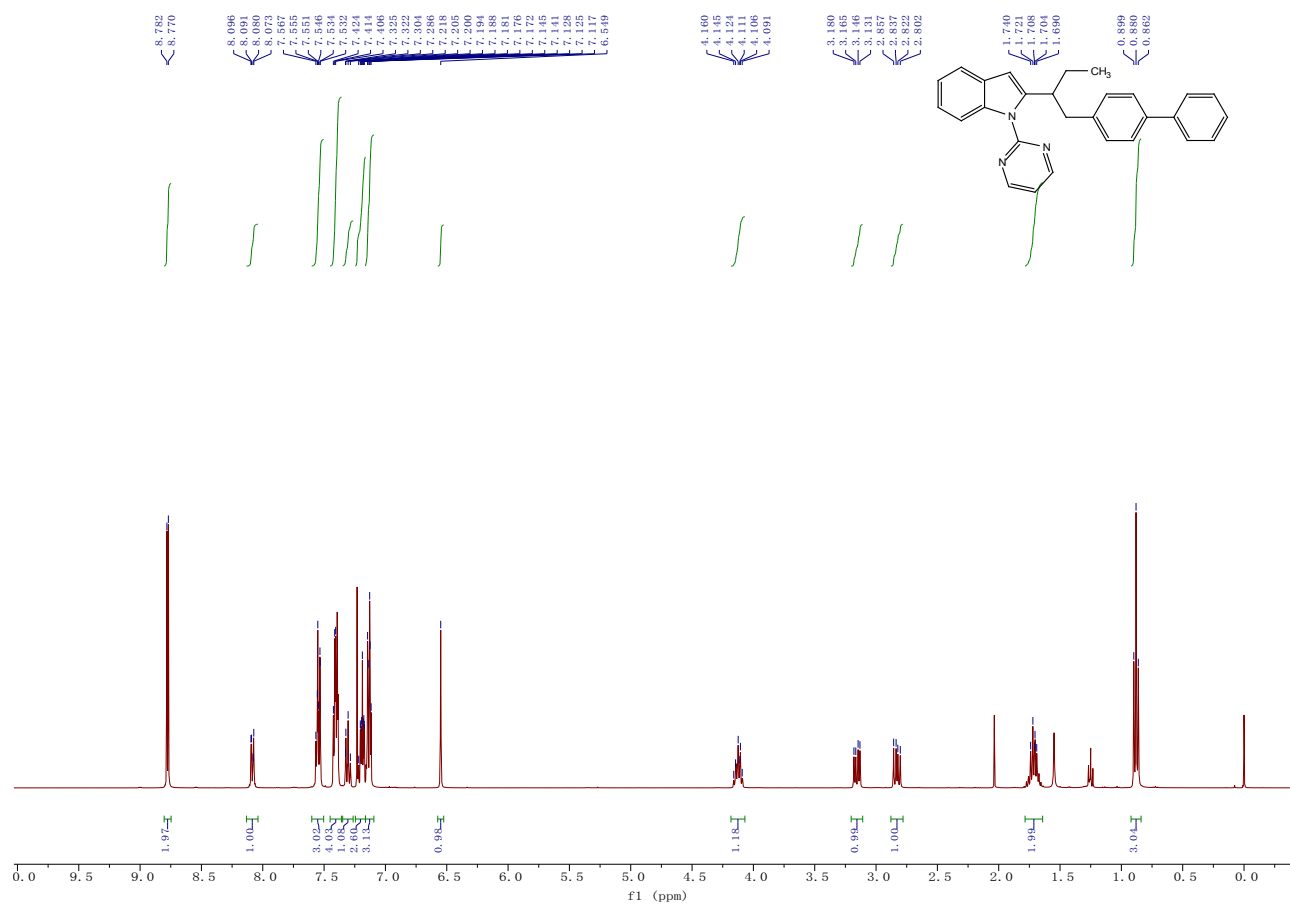

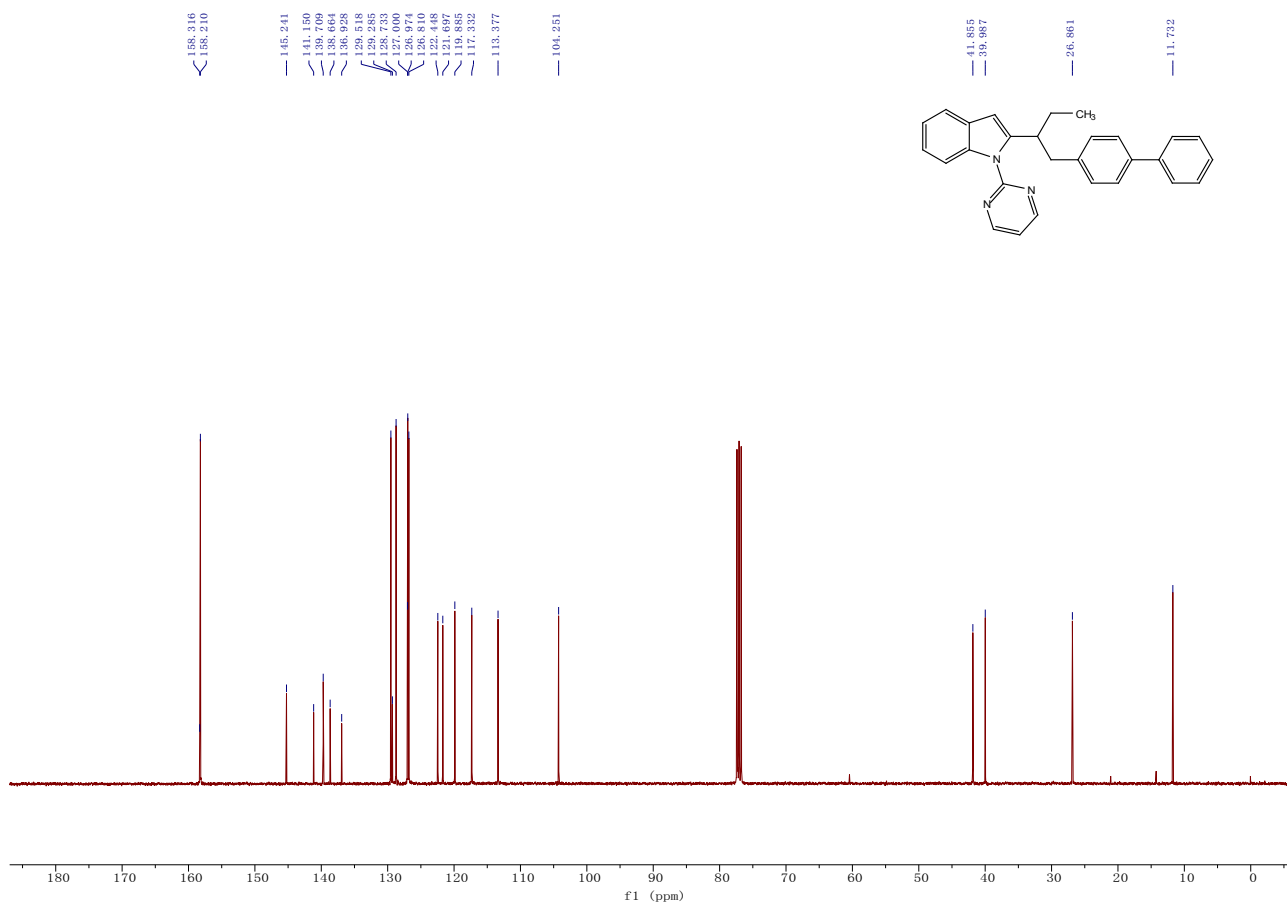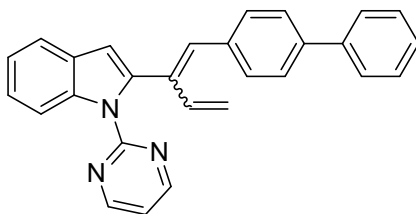

**Compound 4aa:** yellow oil (31.2 mg, 78%).  $^1\text{H}$  NMR (400 MHz, Chloroform-*d*)  $\delta$  4.97 – 5.10 (m, 2H), 6.61 (s, 1H), 6.75 (d,  $J = 4.4$  Hz, 1H), 7.05 (dd,  $J = 4.8$  Hz, 1H), 7.14 (d,  $J = 8.1$  Hz, 2H), 7.30 – 7.43 (m, 6H), 7.53 (d,  $J = 7.0$  Hz, 2H), 7.64 (d,  $J = 7.7$  Hz, 1H), 8.39 (d,  $J = 8.3$  Hz, 1H), 8.66 (d,  $J = 4.8$  Hz, 2H).  $^{13}\text{C}$  NMR (125 MHz,  $\text{CDCl}_3$ )  $\delta$  108.5, 114.2, 115.6, 117.0, 120.7, 121.9, 123.3, 126.6, 126.8, 127.2, 128.7, 129.5, 129.5, 132.6, 134.1, 135.4, 135.7, 136.6, 139.6, 140.6, 157.4, 157.9. IR (neat)  $\nu$  3026, 2957, 2851, 1579, 1547, 1484, 1434, 1386, 1317, 1244, 1221, 1179, 1111, 1076, 1023, 1007  $\text{cm}^{-1}$ . HRMS (ESI) Calcd. for  $\text{C}_{28}\text{H}_{22}\text{N}_3$  requires ( $\text{M}^+\text{+H}$ ): 400.1808, Found: 400.1807.

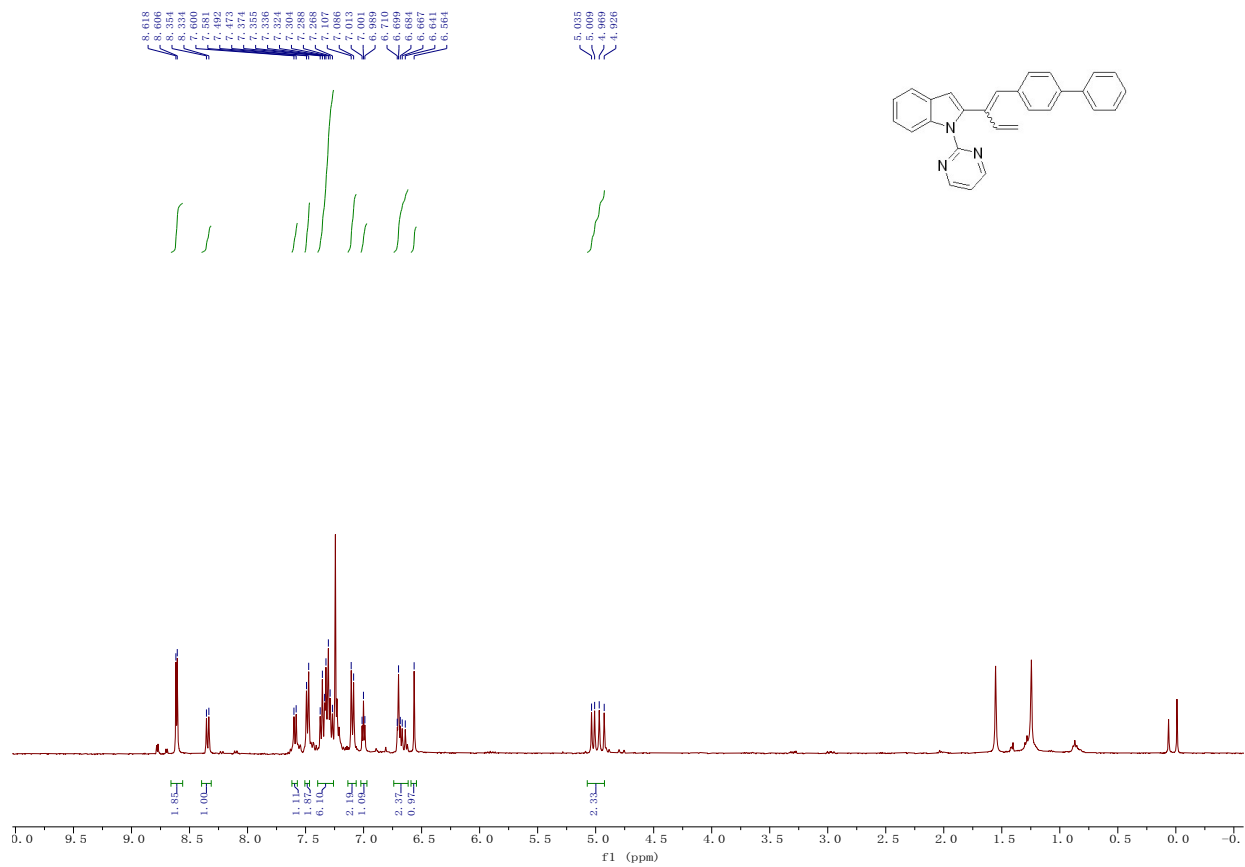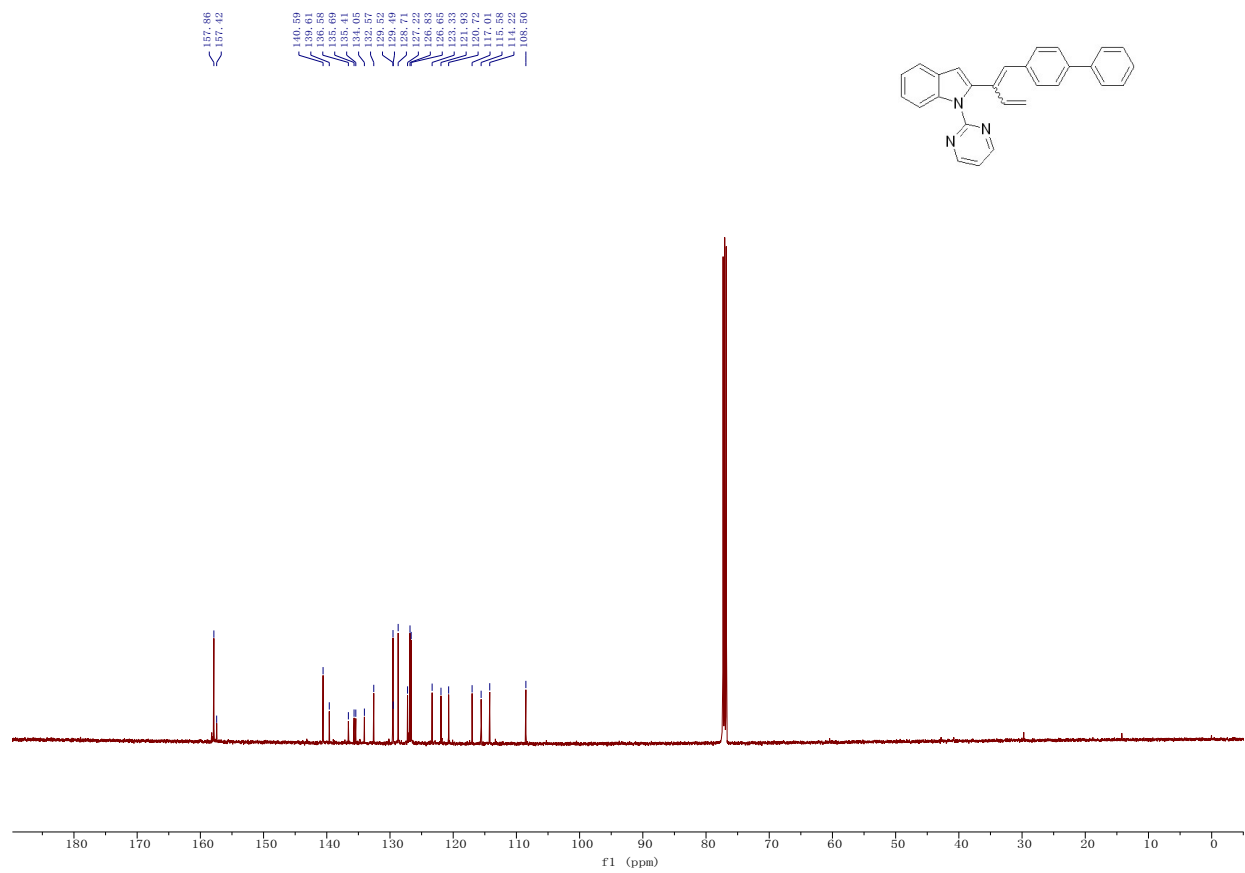



### (E) X-ray Crystal Data

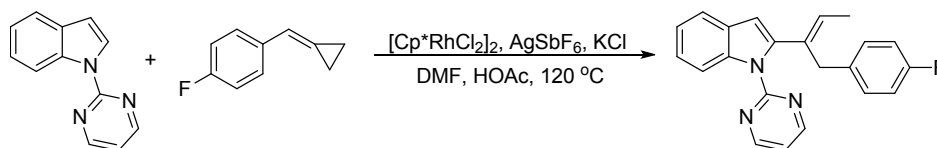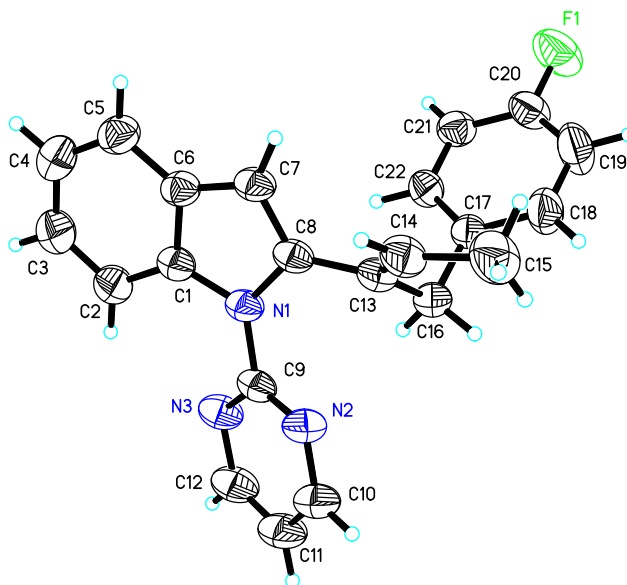

The crystal data of **3af** have been deposited in CCDC with number 1899061. Empirical formula:  $\text{C}_{22}\text{H}_{18}\text{FN}_3$ , Formula weight: 343.39, Crystal system: Monoclinic, Space group: P 21/c, Unit cell dimensions:  $a = 10.944(3)\text{ \AA}$ ,  $\alpha = 90^\circ$ ;  $b = 15.225(4)\text{ \AA}$ ,  $\beta = 102.963(8)^\circ$ ;  $c = 22.273(7)\text{ \AA}$ ,  $\gamma = 90^\circ$ . Volume:  $3616.6(17)\text{ \AA}^3$ ,  $Z = 8$ , Density (calculated):  $1.261\text{ Mg/m}^3$ ,  $F(000) = 1440$ , Crystal size:  $0.200 \times 0.130 \times 0.080\text{ mm}^3$ , Final R indices [ $I > 2\sigma(I)$ ]:  $R1 = 0.0591$ ,  $wR2 = 0.1286$ .

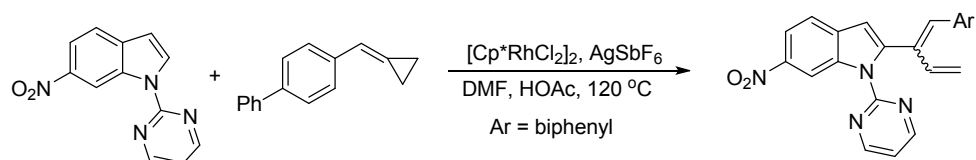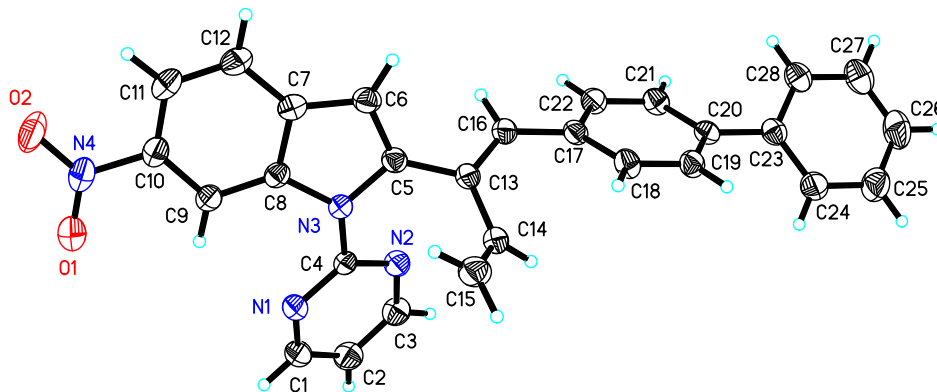

The crystal data of **4aa-NO<sub>2</sub> derivatives** have been deposited in CCDC with number 1878405. Empirical formula: C<sub>28</sub>H<sub>20</sub>N<sub>4</sub>O<sub>2</sub>, Formula weight: 444.48, Crystal system: Triclinic, Space group: P -1, Unit cell dimensions: a = 7.8352(4) Å, α = 86.602(2)°; b = 11.9524(7) Å, β = 78.708(2)°; c = 12.5240(7) Å, γ = 75.444(2)°. Volume: 1113.18(11) Å<sup>3</sup>, Z = 2, Density (calculated): 1.326 Mg/m<sup>3</sup>, F(000) = 464, Crystal size: 0.180 x 0.150 x 0.120 mm<sup>3</sup>, Final R indices [I > 2σ(I)]: R1 = 0.0414, wR2 = 0.1021.
